# Supplementary material for: Differential Impacts of COVID-19 Lockdowns on PM2.5 across the United States
Source: bioRxiv or medRxiv preprint supplement (doi:10.1101/2021.03.10.21253284), 2021-03-12
Supplement: Supplementary file [file media-1.pdf]

## Supplemental Information

### Michigan

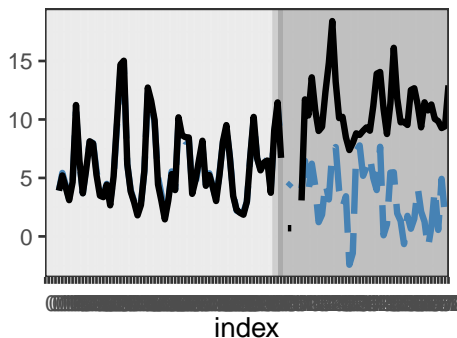

— Treated — Estimated Y(0)

### California

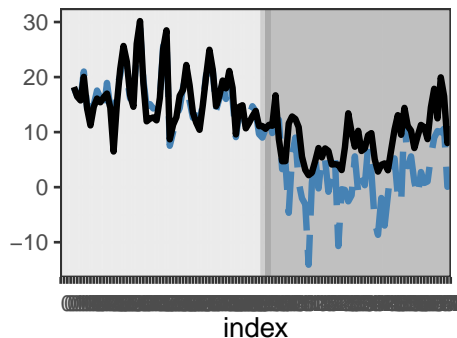

— Treated — Estimated Y(0)

### California

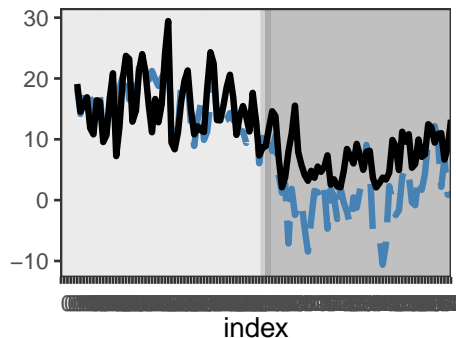

— Treated — Estimated Y(0)

### Idaho

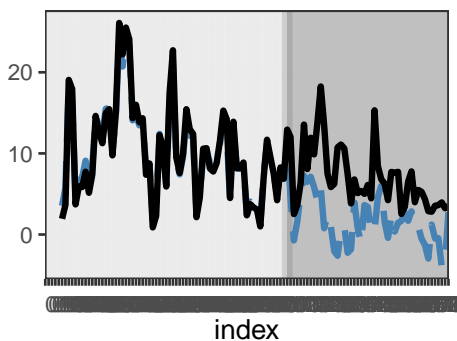

— Treated — Estimated Y(0)

### Iowa

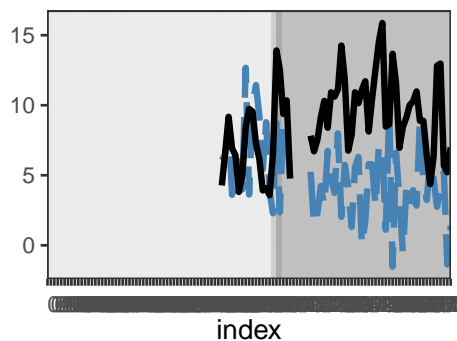

— Treated — Estimated Y(0)

### Georgia

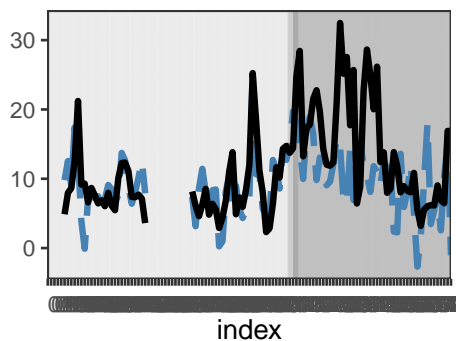

— Treated — Estimated Y(0)

### Wisconsin

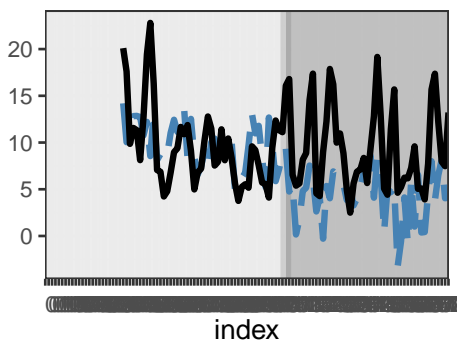

— Treated — Estimated Y(0)

### Indiana

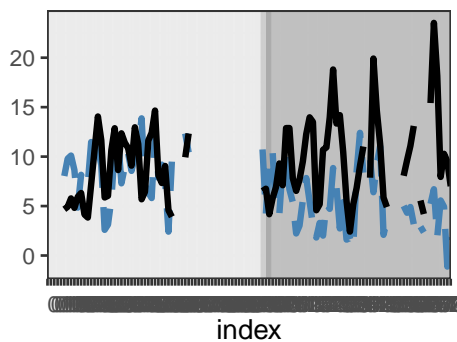

— Treated — Estimated Y(0)

### Michigan

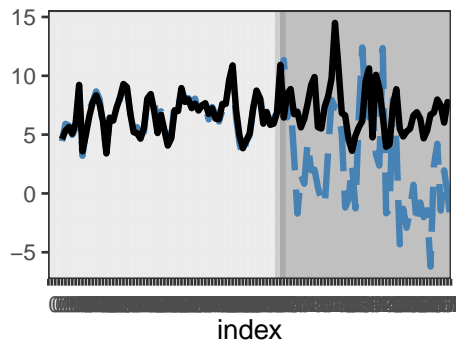

— Treated — Estimated Y(0)

### Ohio

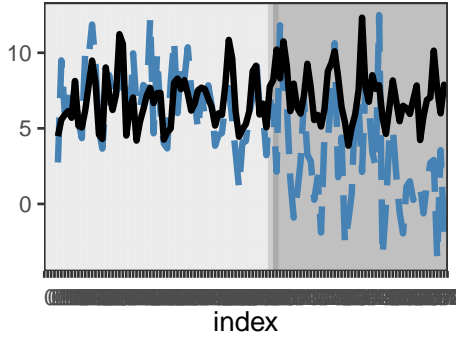

— Treated — Estimated Y(0)

### Nebraska

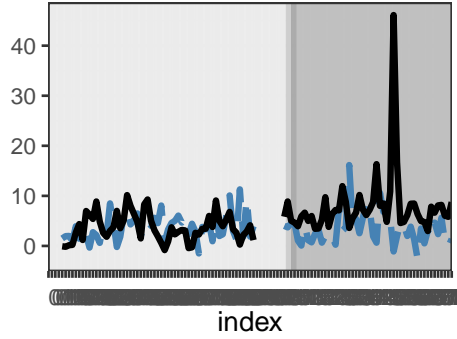

— Treated — Estimated Y(0)

### Michigan

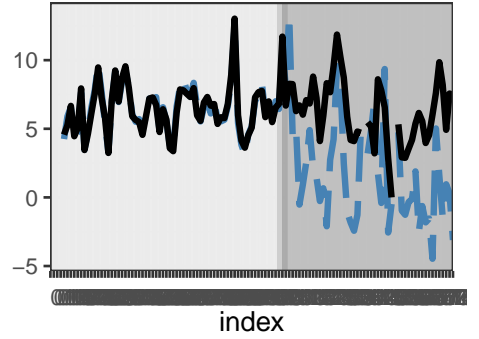

— Treated — Estimated Y(0)

### Michigan

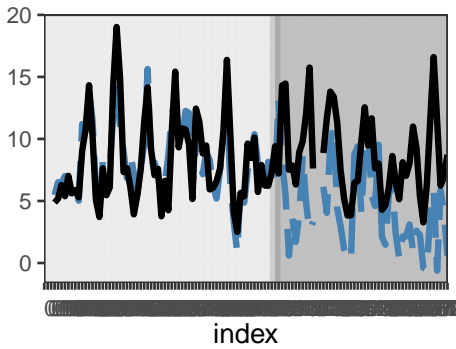

— Treated — Estimated Y(0)

### Michigan

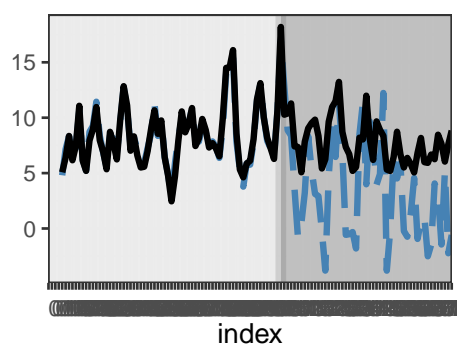

— Treated — Estimated Y(0)

### Wisconsin

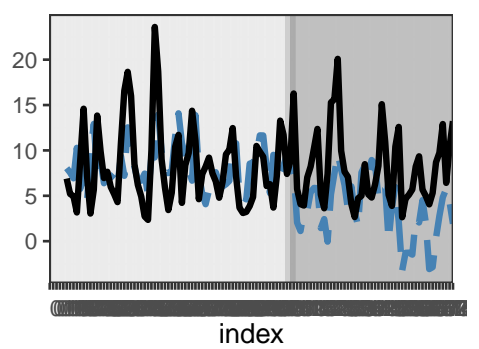

— Treated — Estimated Y(0)

### Michigan

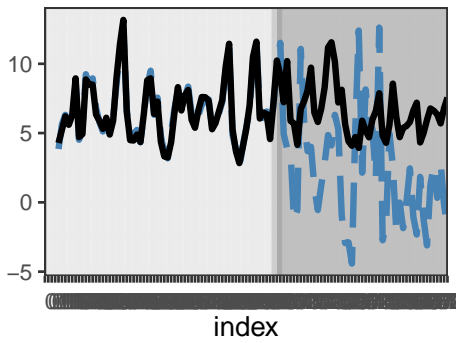

— Treated — Estimated Y(0)

### Rhode Island

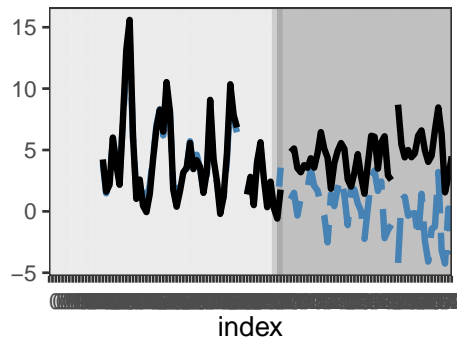

— Treated — Estimated Y(0)

### Michigan

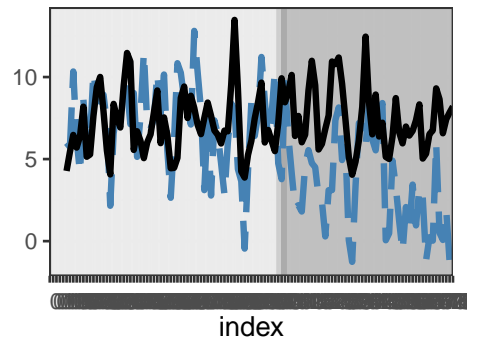

— Treated — Estimated Y(0)

### California

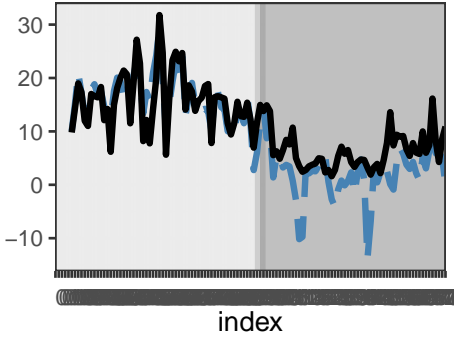

— Treated — Estimated Y(0)

### North Carolina

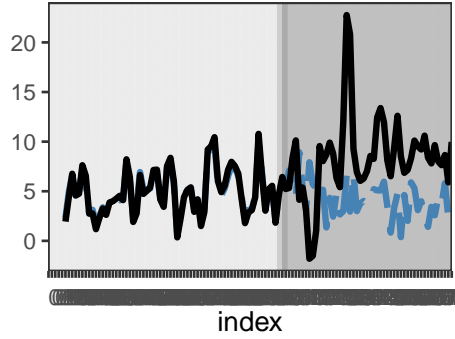

— Treated — Estimated Y(0)

### New Hampshire

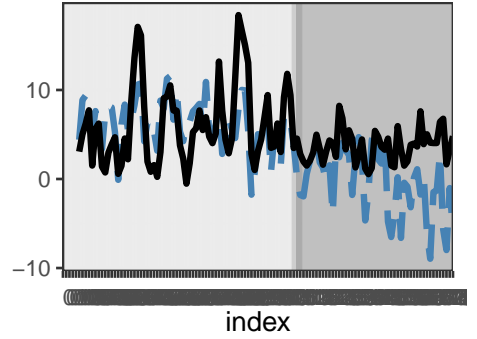

— Treated — Estimated Y(0)

### Wisconsin

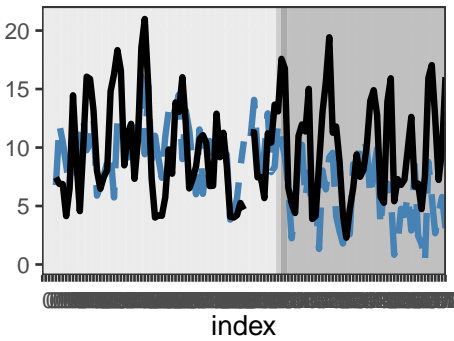

— Treated — Estimated Y(0)

### Iowa

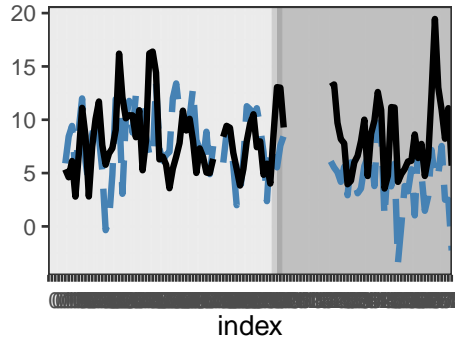

— Treated — Estimated Y(0)

### Wisconsin

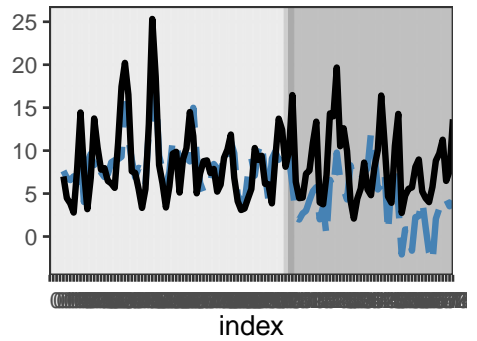

— Treated — Estimated Y(0)

### Michigan

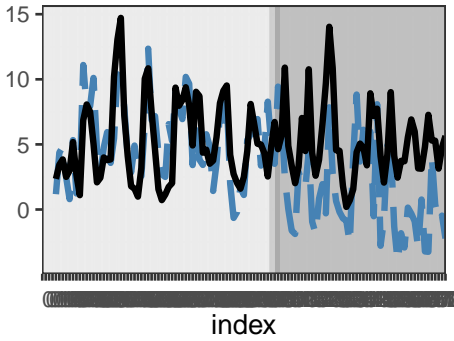

— Treated — Estimated Y(0)

### Wisconsin

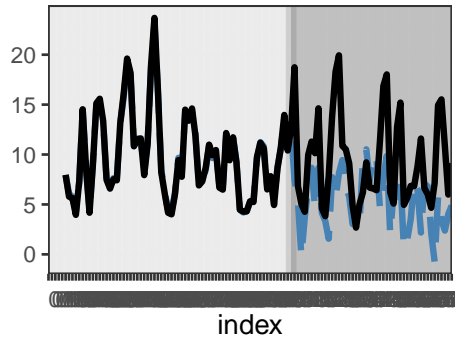

— Treated — Estimated Y(0)

### Texas

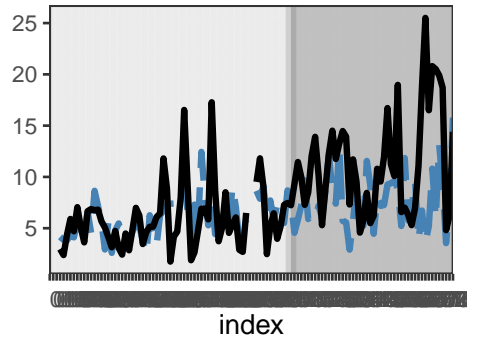

— Treated — Estimated Y(0)

### Ohio

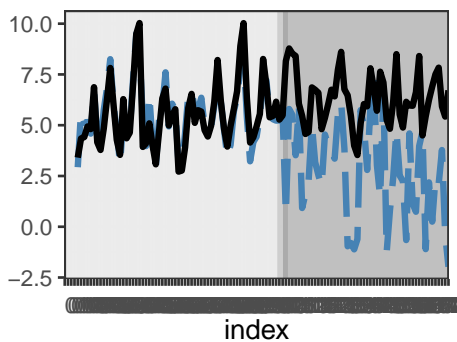

— Treated — Estimated Y(0)

### Michigan

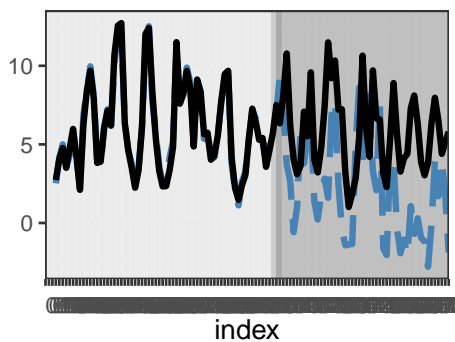

— Treated — Estimated Y(0)

### Kansas

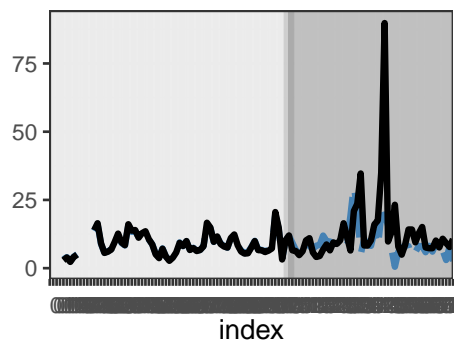

— Treated — Estimated Y(0)

### Montana

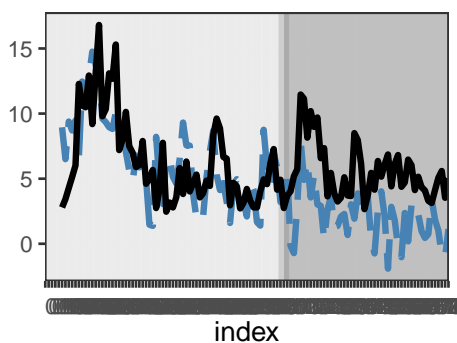

— Treated — Estimated Y(0)

### Connecticut

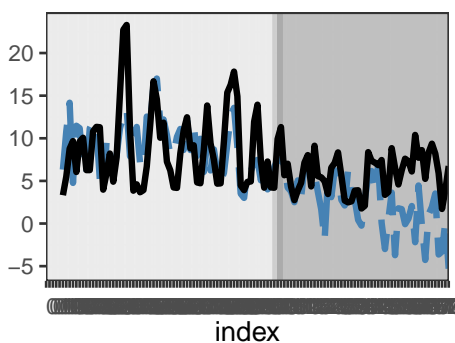

— Treated — Estimated Y(0)

### Indiana

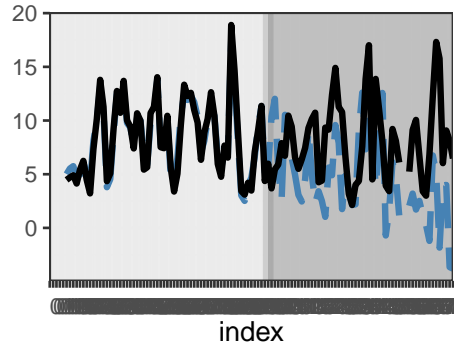

— Treated — Estimated Y(0)

### Illinois

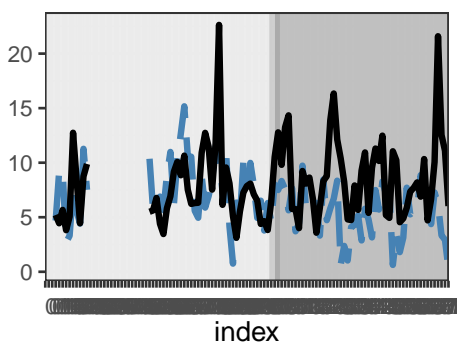

— Treated — Estimated Y(0)

### Indiana

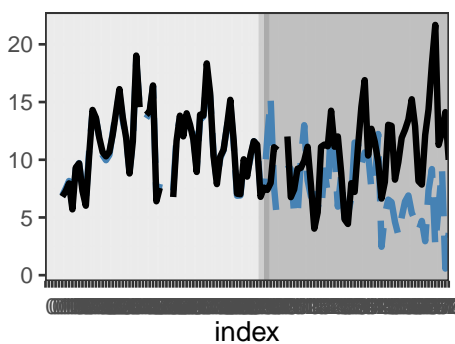

— Treated — Estimated Y(0)

### Wisconsin

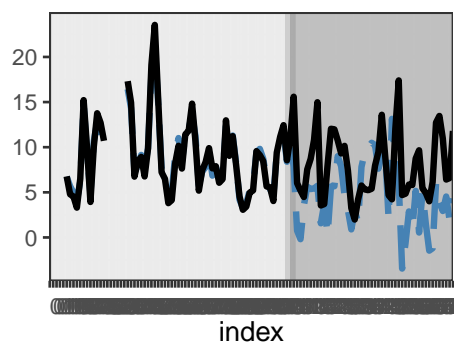

— Treated — Estimated Y(0)

### Iowa

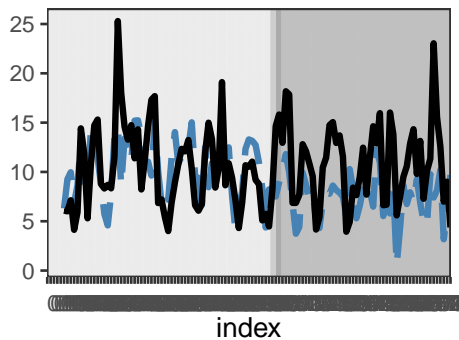

— Treated — Estimated Y(0)

### North Carolina

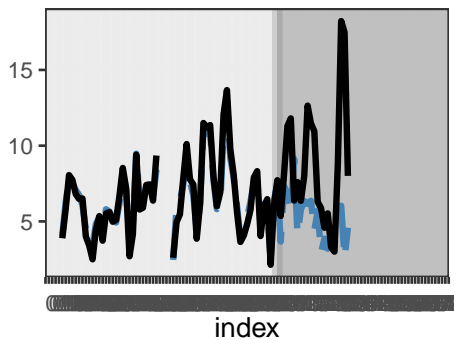

— Treated — Estimated Y(0)

### Iowa

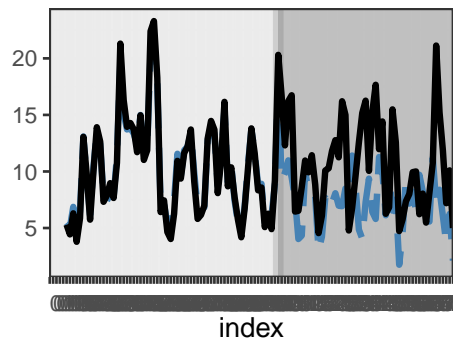

— Treated — Estimated Y(0)

### Iowa

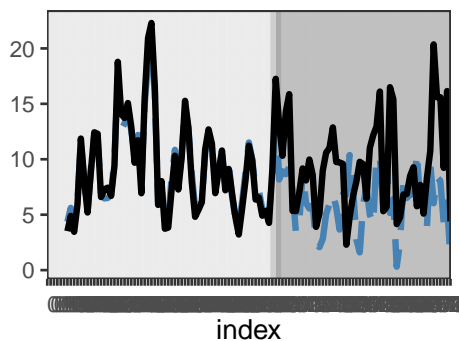

— Treated — Estimated Y(0)

### Wisconsin

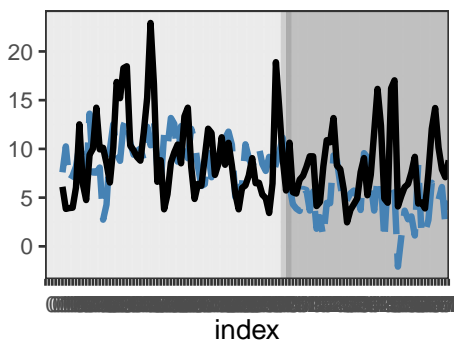

— Treated — Estimated Y(0)

### Ohio

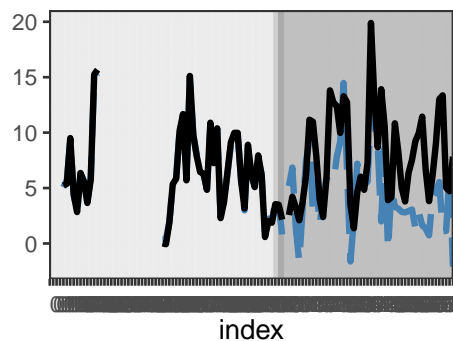

— Treated — Estimated Y(0)

### Colorado

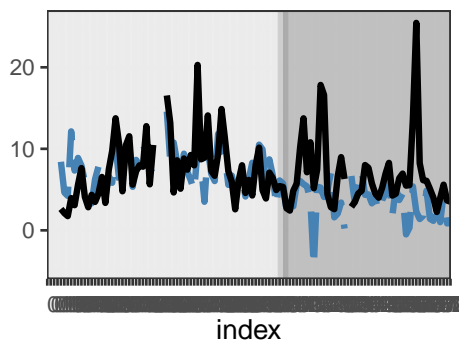

— Treated — Estimated Y(0)

### Ohio

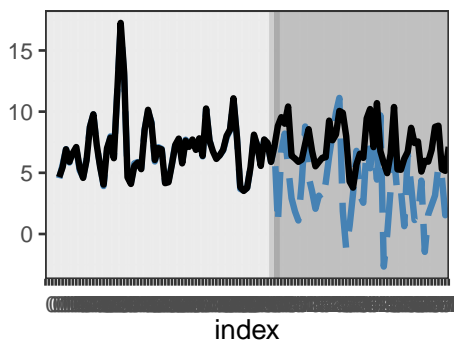

— Treated — Estimated Y(0)

### Minnesota

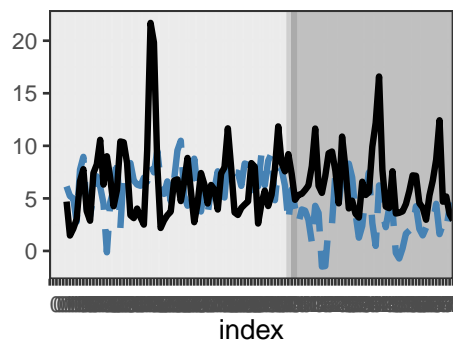

— Treated — Estimated Y(0)

### Michigan

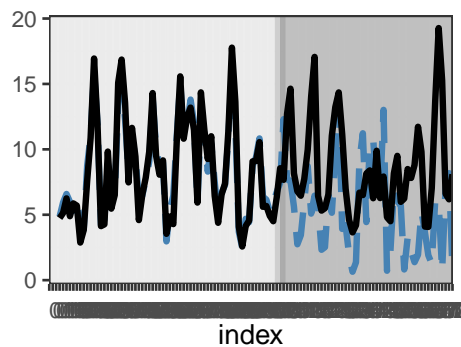

— Treated — Estimated Y(0)

### Ohio

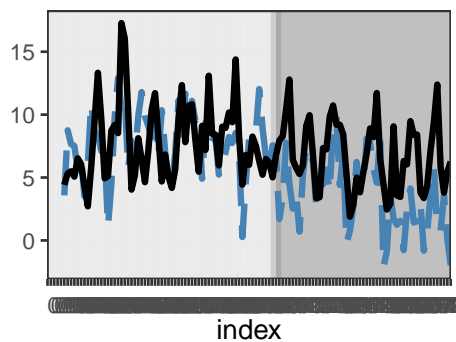

— Treated — Estimated Y(0)

### Michigan

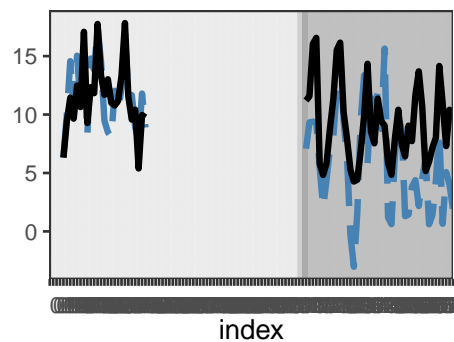

— Treated — Estimated Y(0)

### Illinois

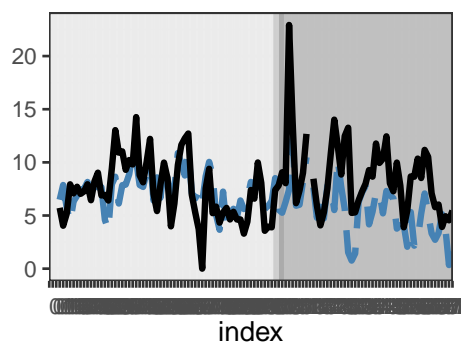

— Treated — Estimated Y(0)

### Oregon

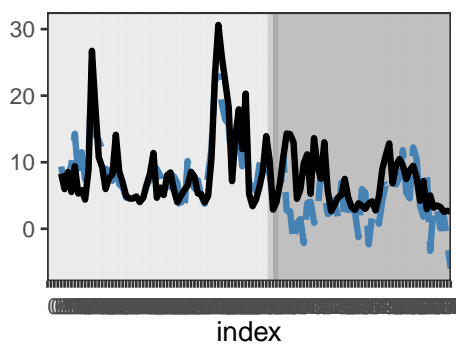

— Treated — Estimated Y(0)

### Georgia

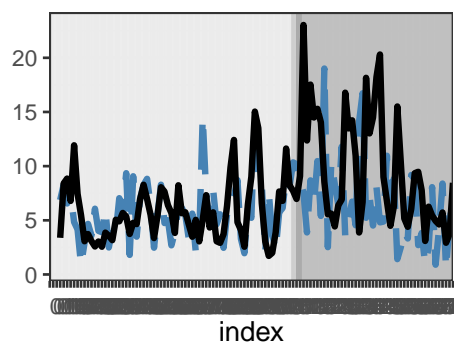

— Treated — Estimated Y(0)

### Indiana

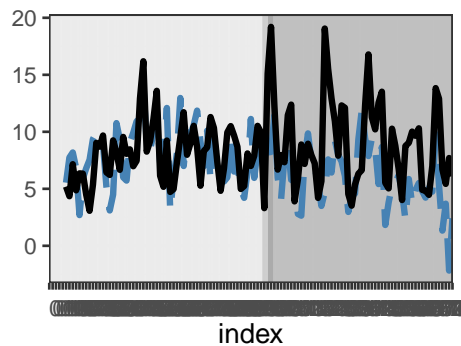

— Treated — Estimated Y(0)

### California

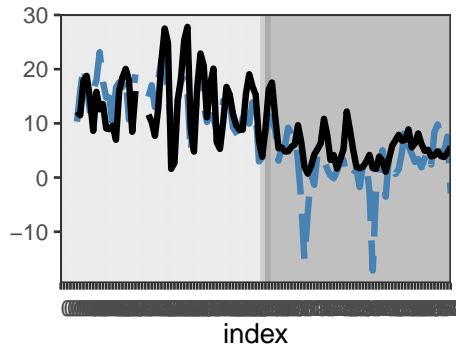

— Treated — Estimated Y(0)

### Pennsylvania

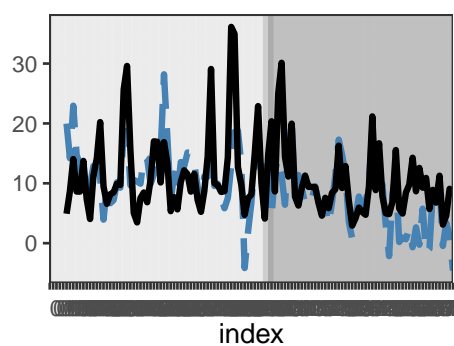

— Treated — Estimated Y(0)

### Colorado

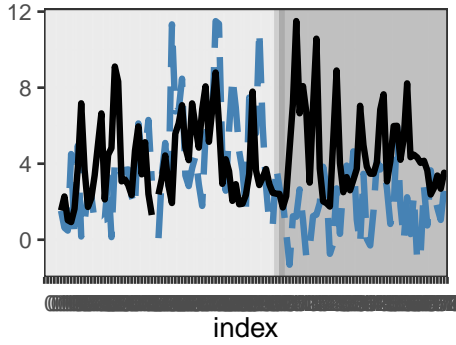

— Treated — Estimated Y(0)

### Illinois

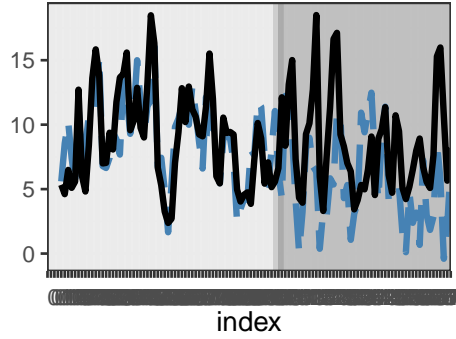

— Treated — Estimated Y(0)

### Maryland

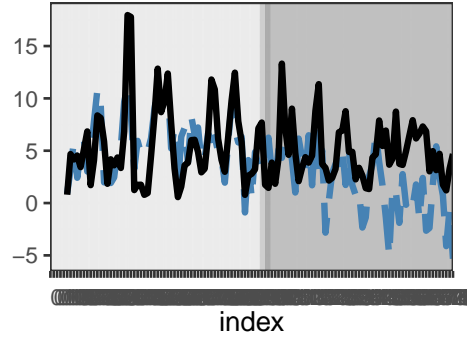

— Treated — Estimated Y(0)

### Indiana

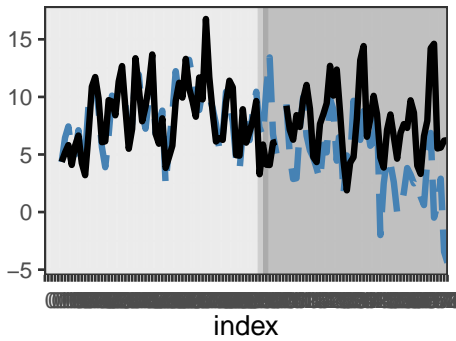

— Treated — Estimated Y(0)

### Montana

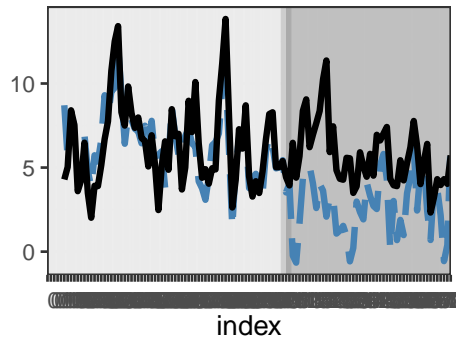

— Treated — Estimated Y(0)

### Wisconsin

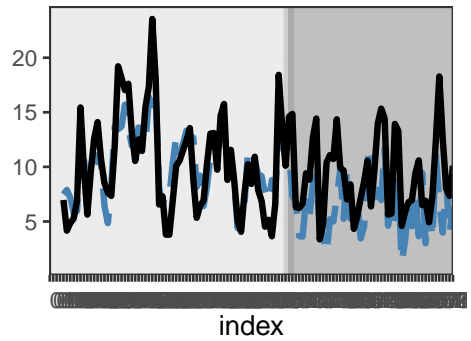

— Treated — Estimated Y(0)

### Indiana

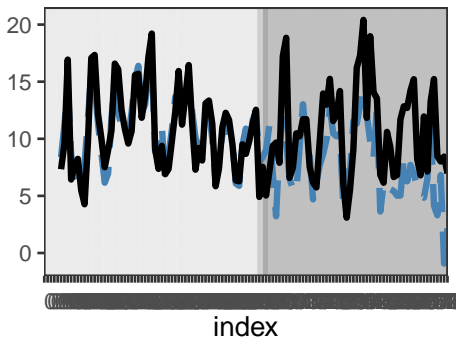

— Treated — Estimated Y(0)

### Montana

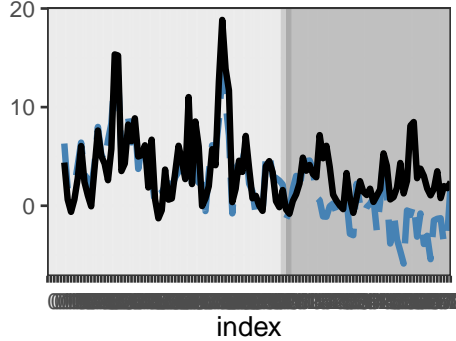

— Treated — Estimated Y(0)

### Indiana

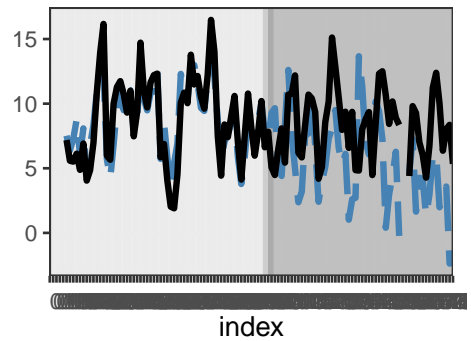

— Treated — Estimated Y(0)



### Pennsylvania

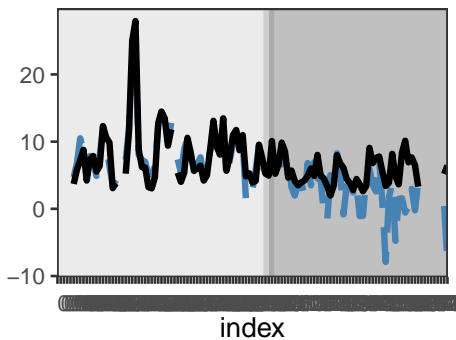

— Treated — Estimated Y(0)

### Wisconsin

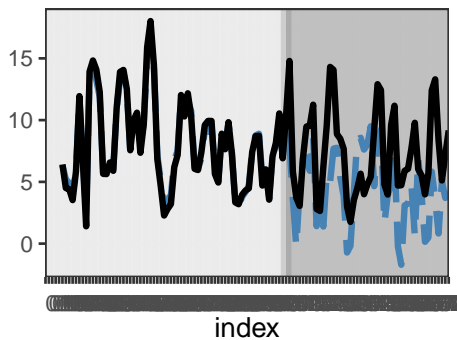

— Treated — Estimated Y(0)

### Colorado

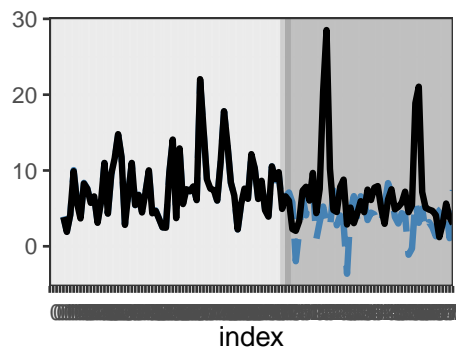

— Treated — Estimated Y(0)

### Montana

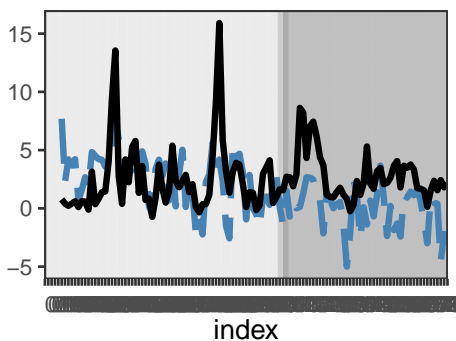

— Treated — Estimated Y(0)

### Pennsylvania

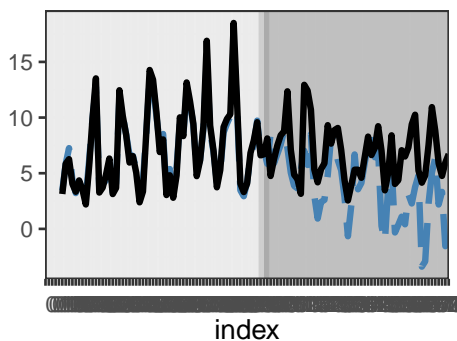

— Treated — Estimated Y(0)

### Utah

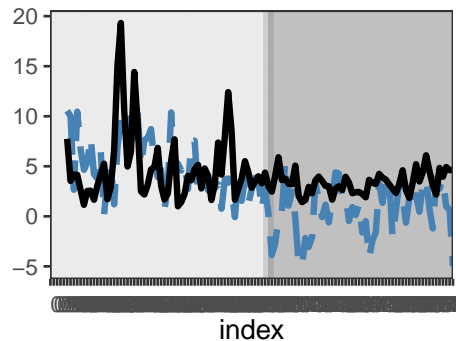

— Treated — Estimated Y(0)

### Montana

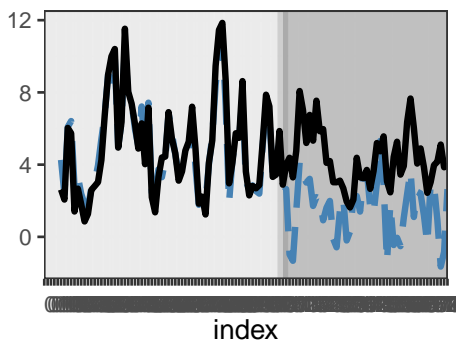

— Treated — Estimated Y(0)

### Delaware

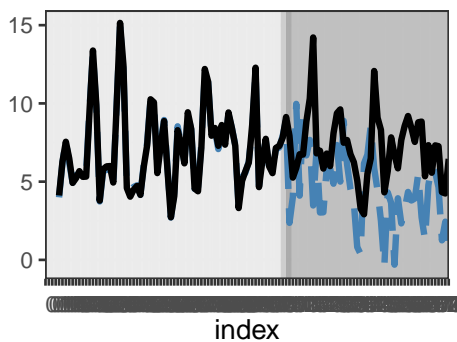

— Treated — Estimated Y(0)

### Maine

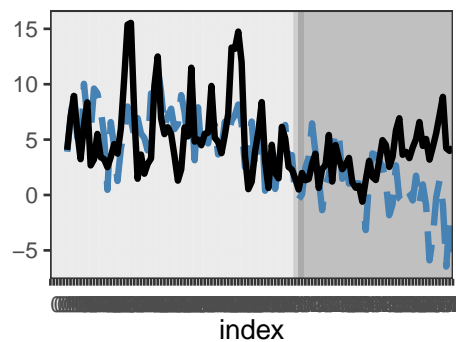

— Treated — Estimated Y(0)

### Colorado

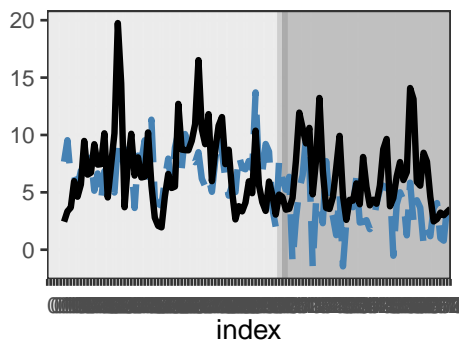

— Treated — Estimated Y(0)

### Ohio

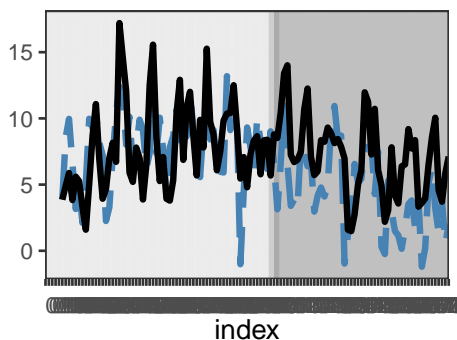

— Treated — Estimated Y(0)

### Minnesota

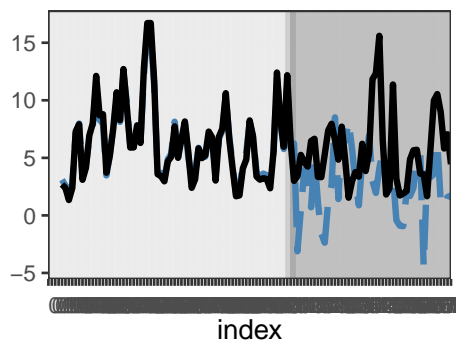

— Treated — Estimated Y(0)

### Montana

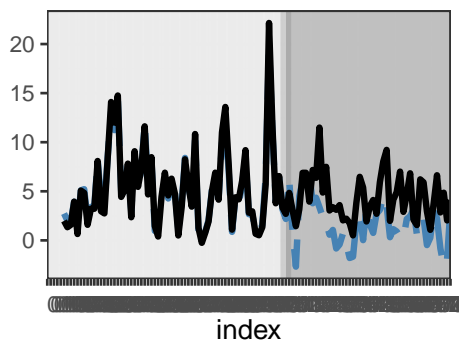

— Treated — Estimated Y(0)

### California

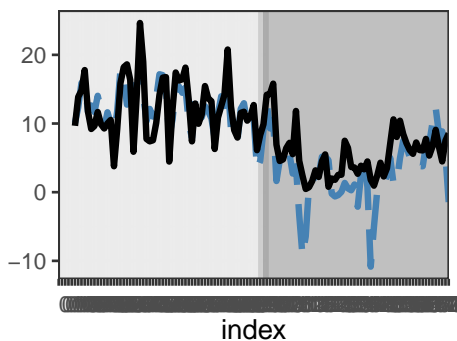

— Treated — Estimated Y(0)

### Maine

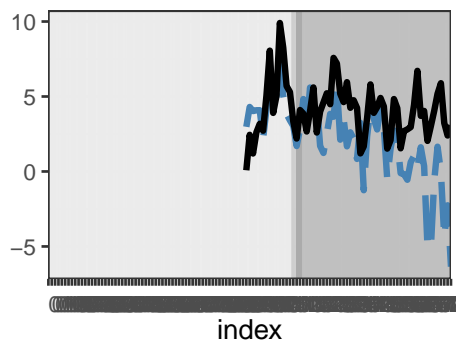

— Treated — Estimated Y(0)

### Oregon

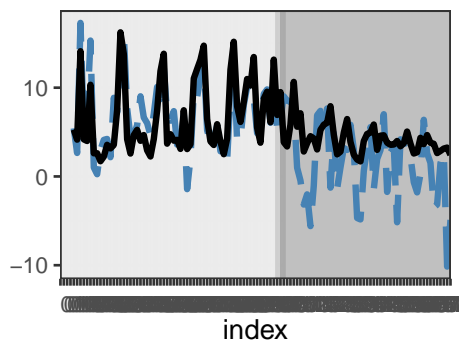

— Treated — Estimated Y(0)

### Washington

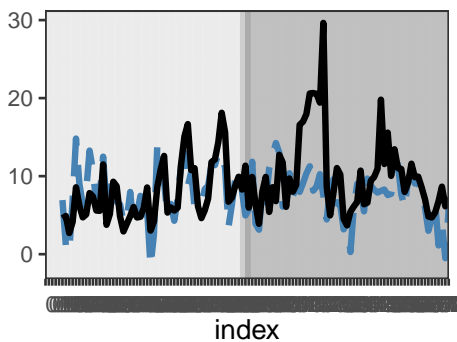

— Treated — Estimated Y(0)

### Washington

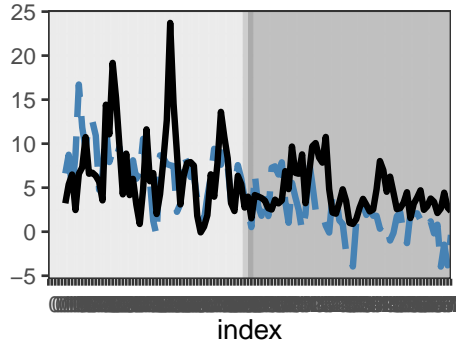

— Treated — Estimated Y(0)

### Indiana

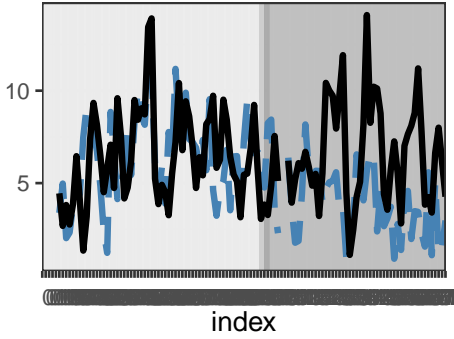

— Treated — Estimated Y(0)

### Pennsylvania

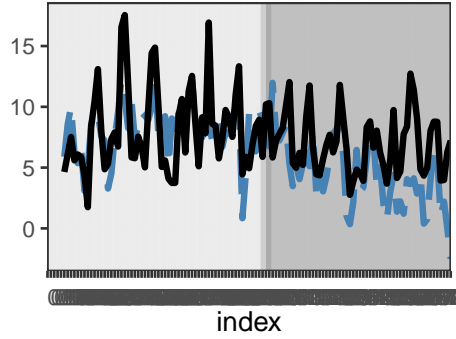

— Treated — Estimated Y(0)

### Wisconsin

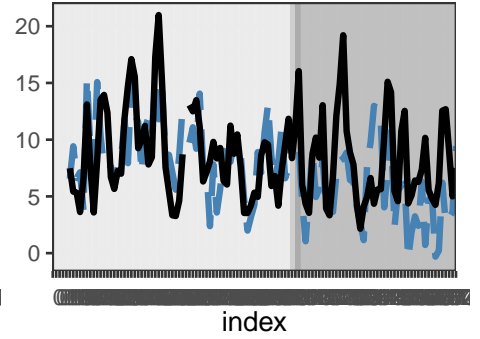

— Treated — Estimated Y(0)

### Minnesota

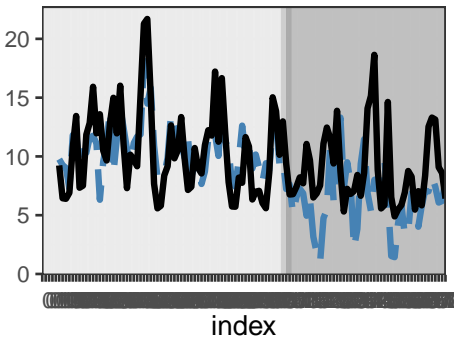

— Treated — Estimated Y(0)

### Massachusetts

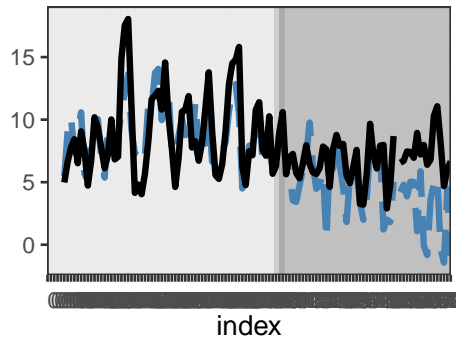

— Treated — Estimated Y(0)

### Ohio

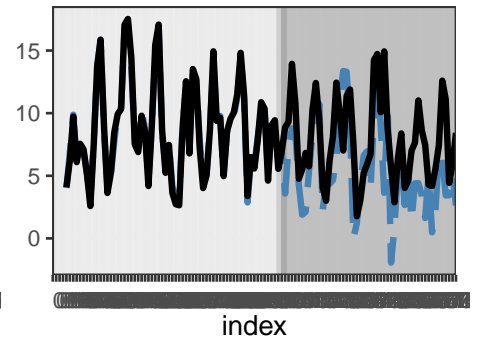

— Treated — Estimated Y(0)

### Illinois

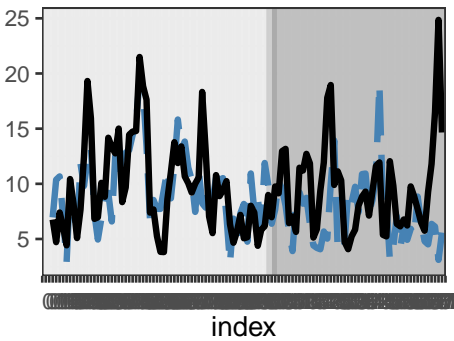

— Treated — Estimated Y(0)

### Louisiana

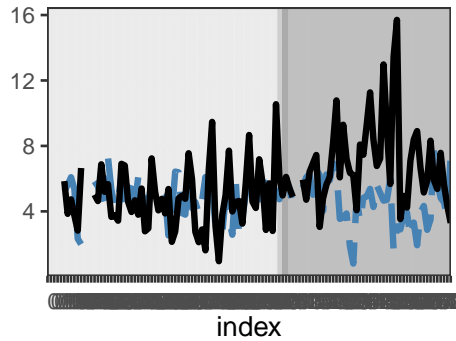

— Treated — Estimated Y(0)

### Utah

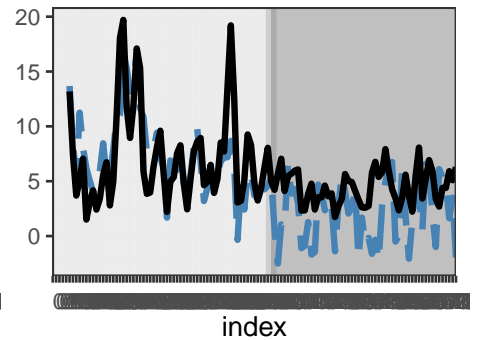

— Treated — Estimated Y(0)

### Iowa

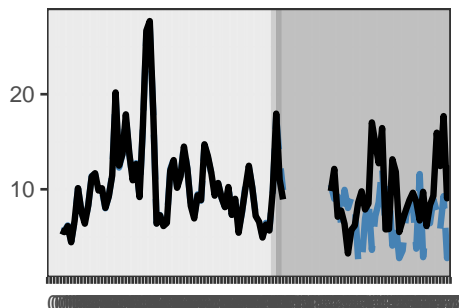

— Treated — Estimated Y(0)

### Oregon

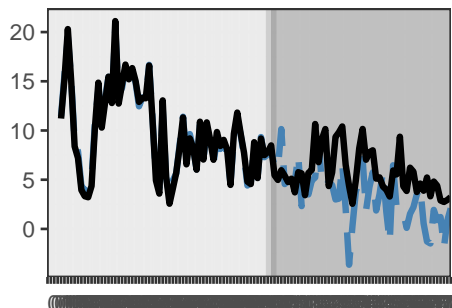

— Treated — Estimated Y(0)

### Georgia

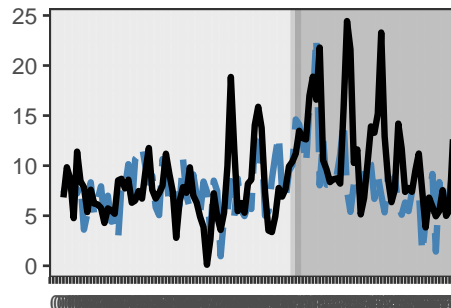

— Treated — Estimated Y(0)

### Idaho

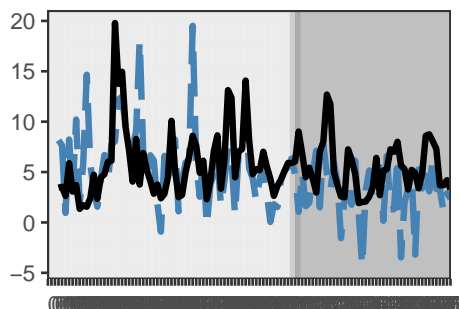

— Treated — Estimated Y(0)

### Florida

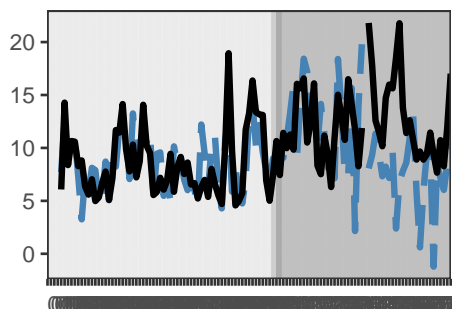

— Treated — Estimated Y(0)

### Pennsylvania

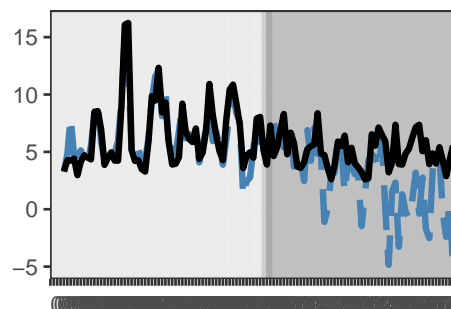

— Treated — Estimated Y(0)

### Pennsylvania

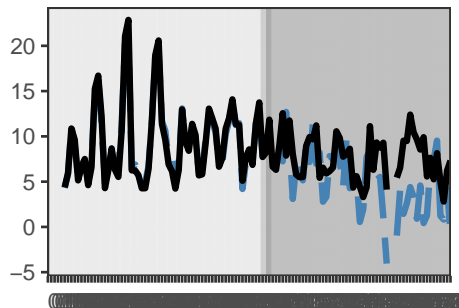

— Treated — Estimated Y(0)

### Connecticut

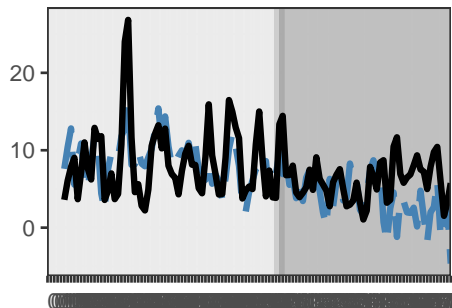

— Treated — Estimated Y(0)

### Indiana

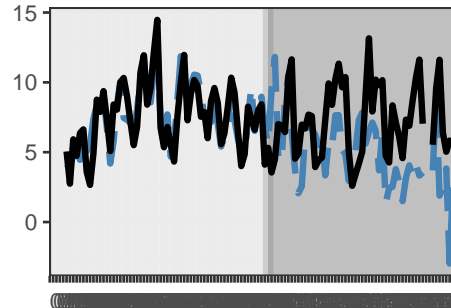

— Treated — Estimated Y(0)

### Minnesota

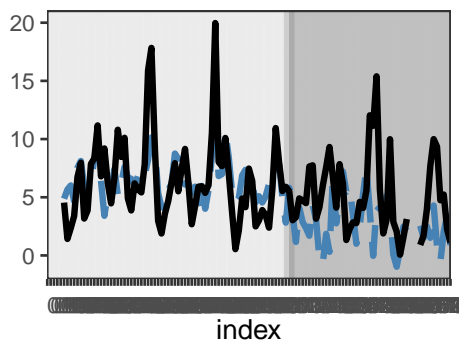

— Treated — Estimated Y(0)

### Louisiana

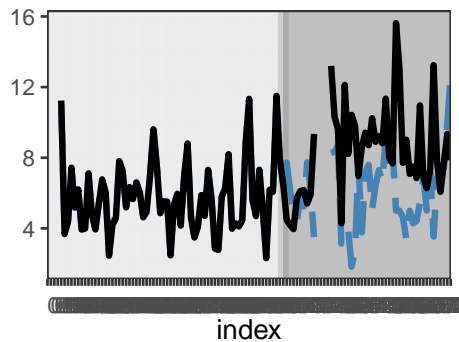

— Treated — Estimated Y(0)

### Minnesota

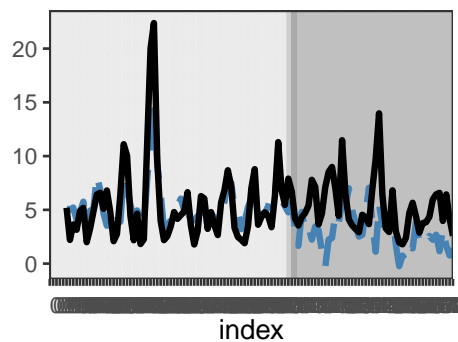

— Treated — Estimated Y(0)

### Ohio

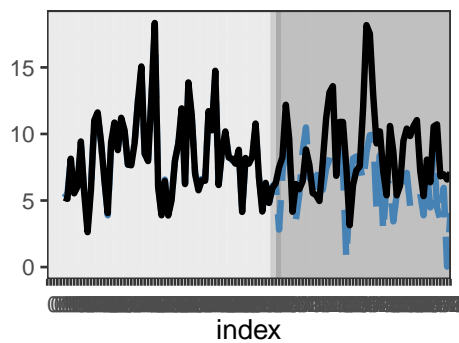

— Treated — Estimated Y(0)

### Massachusetts

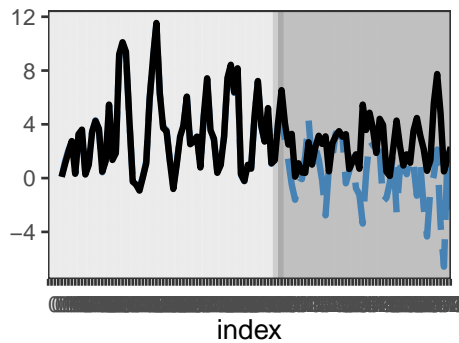

— Treated — Estimated Y(0)

### North Carolina

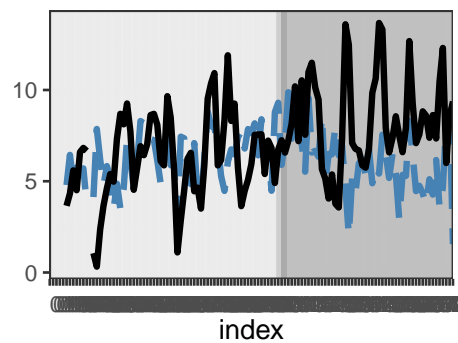

— Treated — Estimated Y(0)

### Delaware

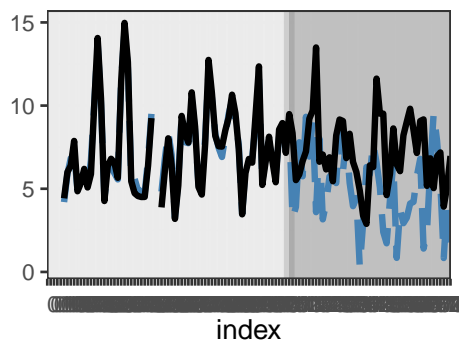

— Treated — Estimated Y(0)

### Minnesota

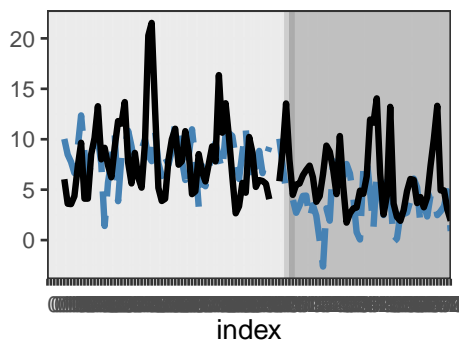

— Treated — Estimated Y(0)

### Mississippi

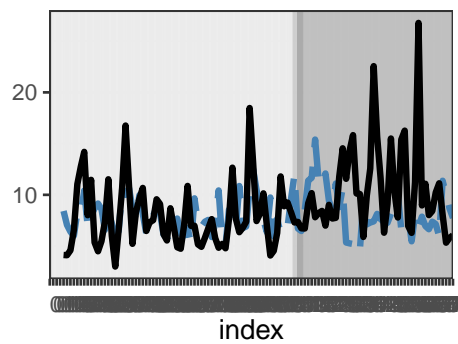

— Treated — Estimated Y(0)

### Pennsylvania

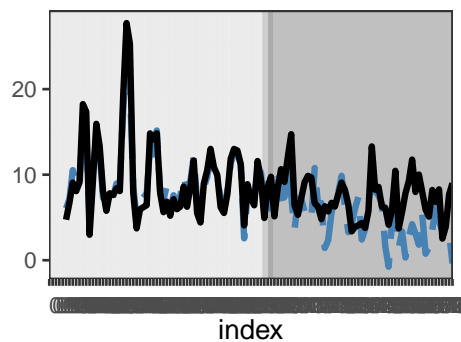

— Treated — Estimated Y(0)

### Mississippi

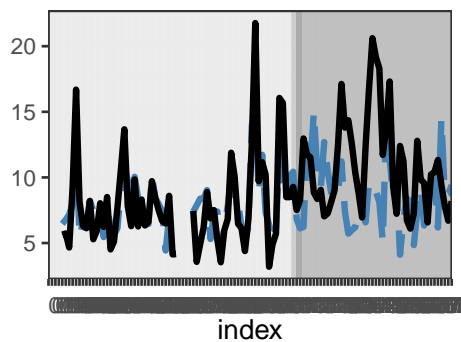

— Treated — Estimated Y(0)

### Georgia

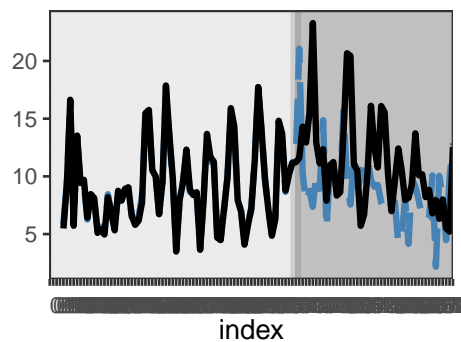

— Treated — Estimated Y(0)

### Mississippi

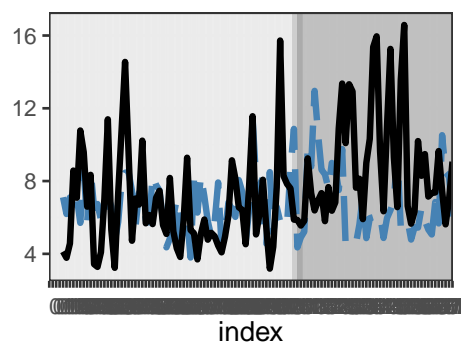

— Treated — Estimated Y(0)

### Indiana

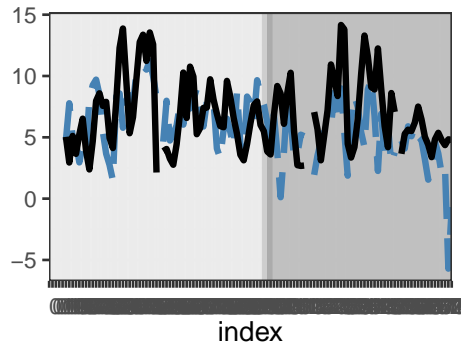

— Treated — Estimated Y(0)

### Mississippi

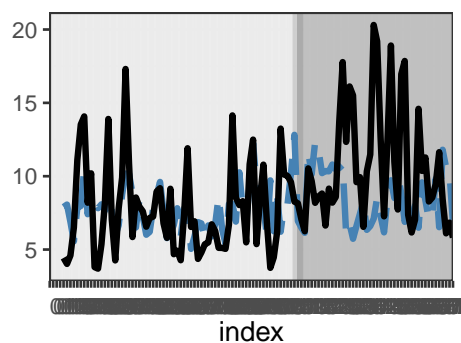

— Treated — Estimated Y(0)

### Colorado

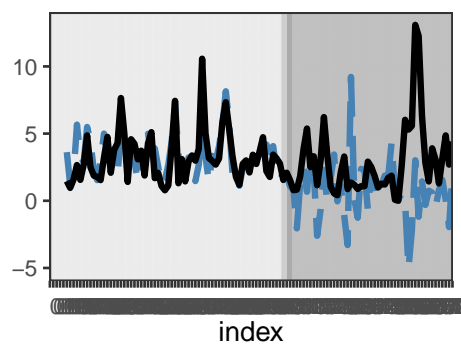

— Treated — Estimated Y(0)

### Minnesota

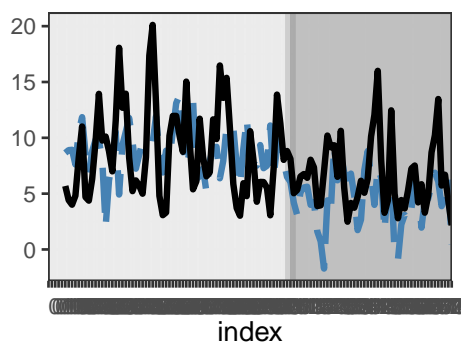

— Treated — Estimated Y(0)

### Indiana

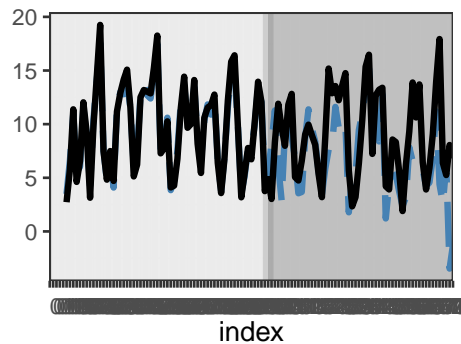

— Treated — Estimated Y(0)

### Minnesota

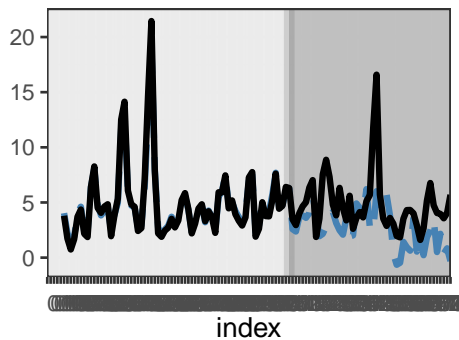

— Treated — Estimated Y(0)

### Delaware

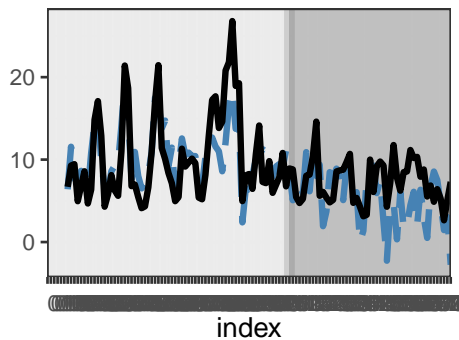

— Treated — Estimated Y(0)

### Illinois

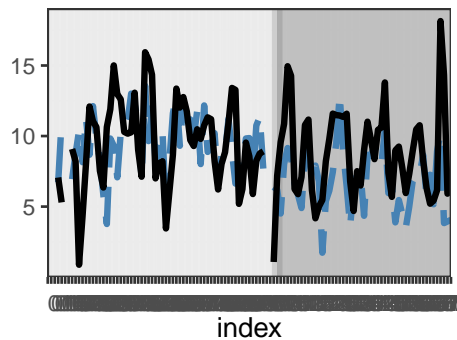

— Treated — Estimated Y(0)

### Kentucky

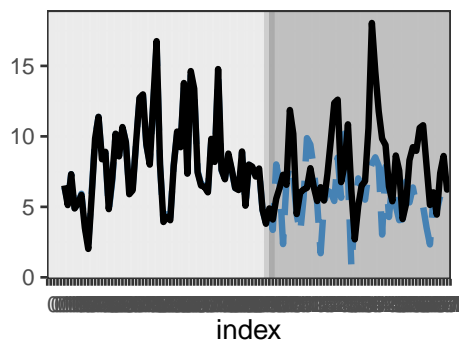

— Treated — Estimated Y(0)

### Mississippi

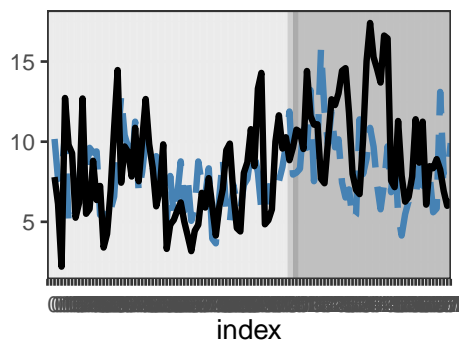

— Treated — Estimated Y(0)

### New Hampshire

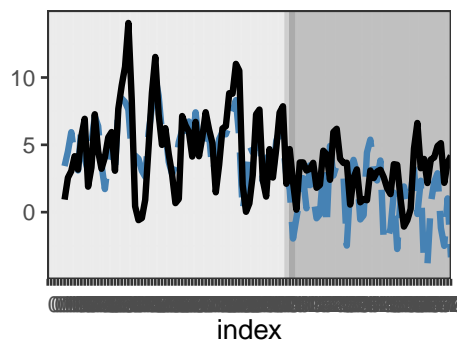

— Treated — Estimated Y(0)

### Connecticut

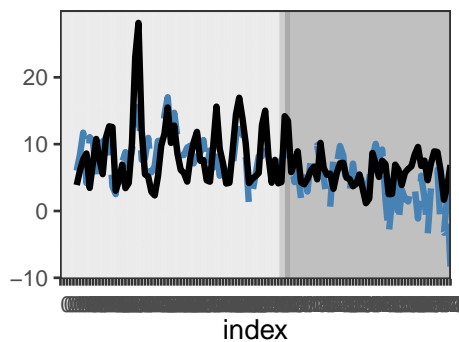

— Treated — Estimated Y(0)

### Pennsylvania

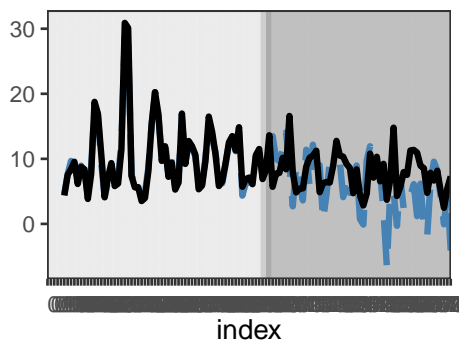

— Treated — Estimated Y(0)

### Georgia

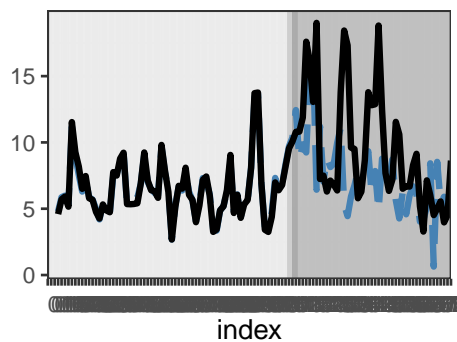

— Treated — Estimated Y(0)

### Kentucky

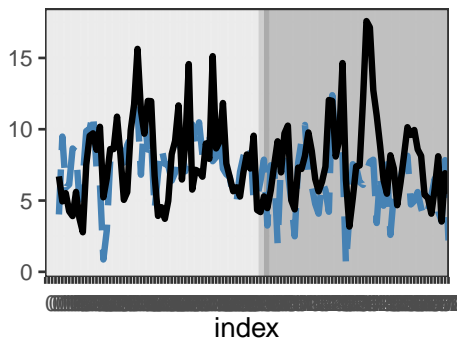

— Treated — Estimated Y(0)

### Texas

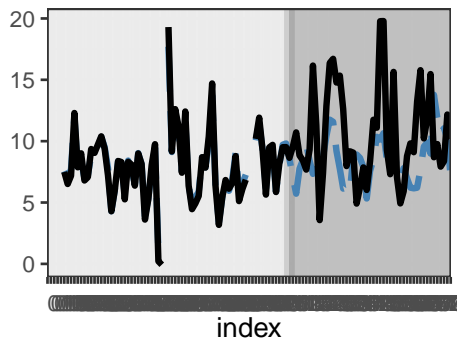

— Treated — Estimated Y(0)

### Kentucky

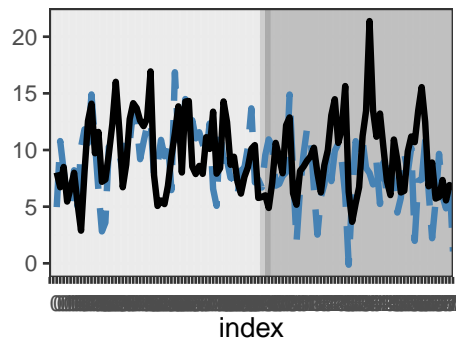

— Treated — Estimated Y(0)

### Georgia

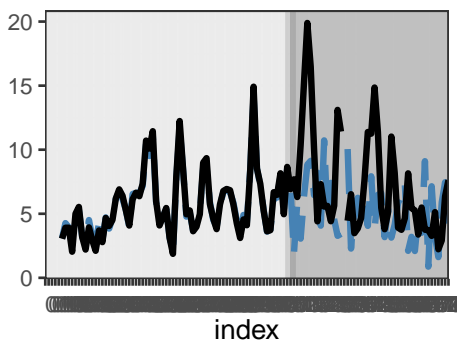

— Treated — Estimated Y(0)

### New Hampshire

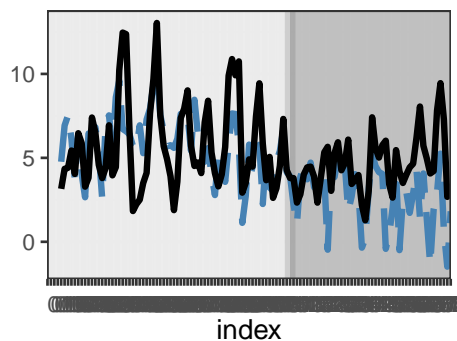

— Treated — Estimated Y(0)

### Oregon

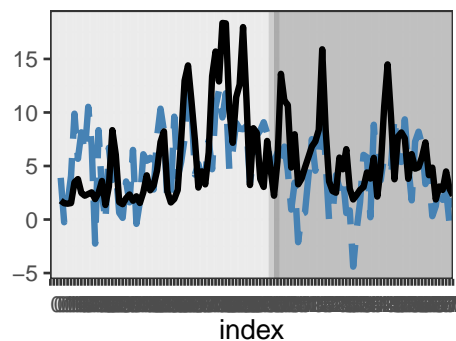

— Treated — Estimated Y(0)

### Rhode Island

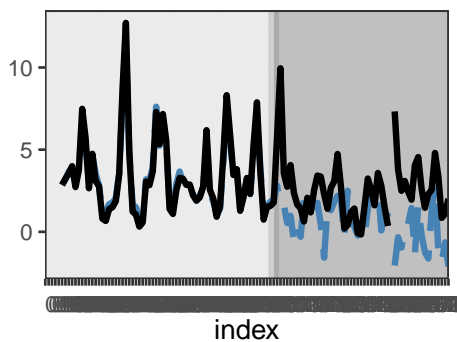

— Treated — Estimated Y(0)

### Georgia

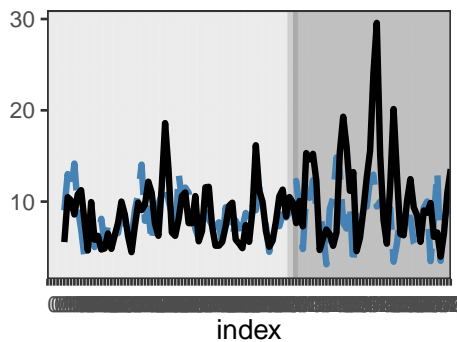

— Treated — Estimated Y(0)

### Massachusetts

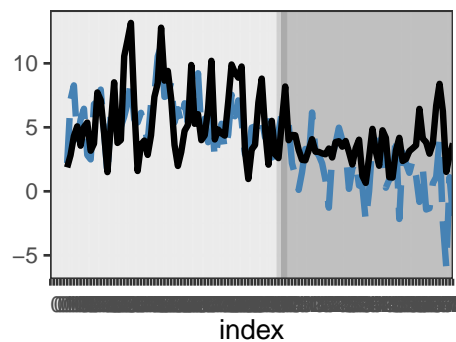

— Treated — Estimated Y(0)



### Indiana

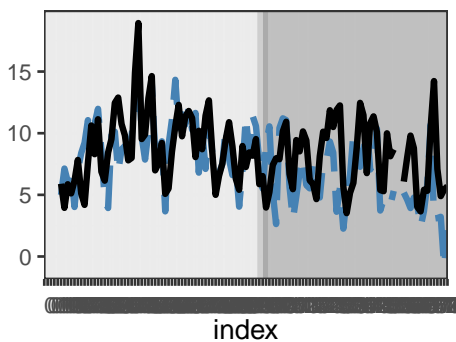

— Treated — Estimated Y(0)

### Arkansas

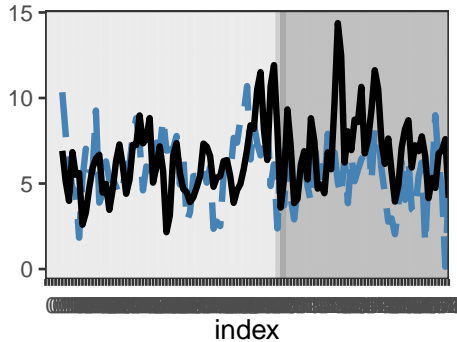

— Treated — Estimated Y(0)

### South Carolina

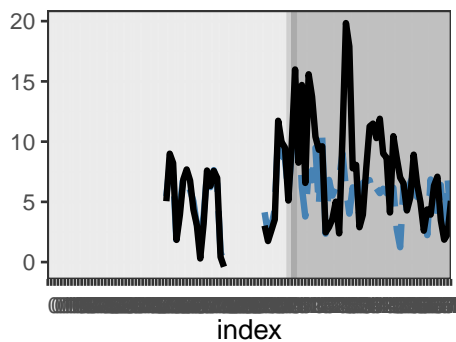

— Treated — Estimated Y(0)

### Indiana

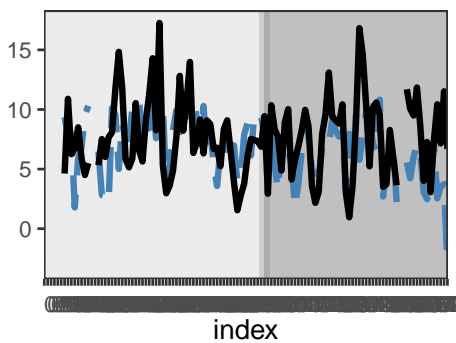

— Treated — Estimated Y(0)

### Maryland

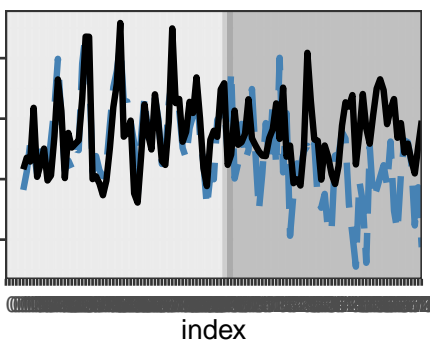

— Treated — Estimated Y(0)

### Minnesota

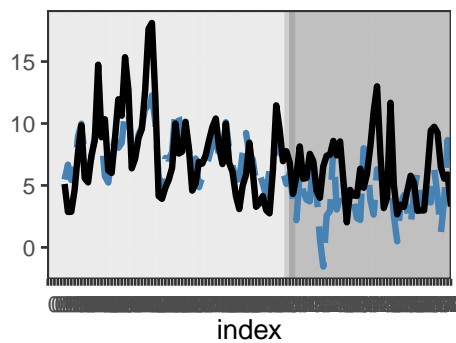

— Treated — Estimated Y(0)

### Georgia

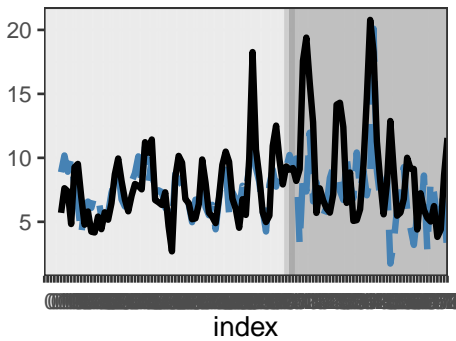

— Treated — Estimated Y(0)

### Maryland

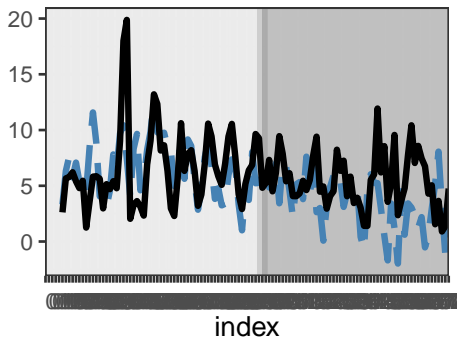

— Treated — Estimated Y(0)

### Delaware

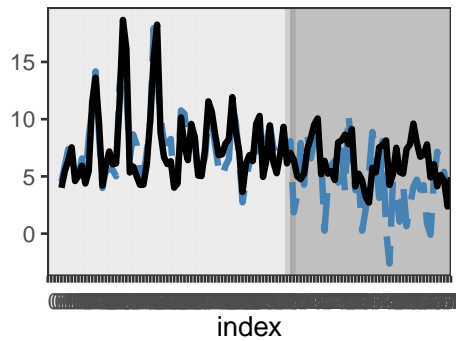

— Treated — Estimated Y(0)

### Kentucky

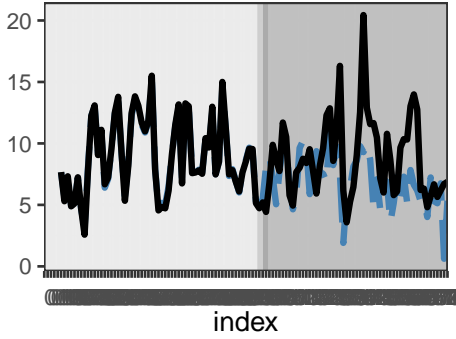

— Treated — Estimated Y(0)

### Connecticut

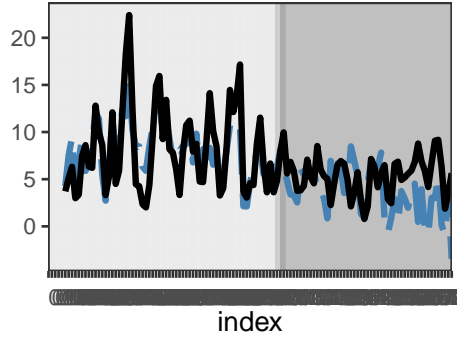

— Treated — Estimated Y(0)

### Montana

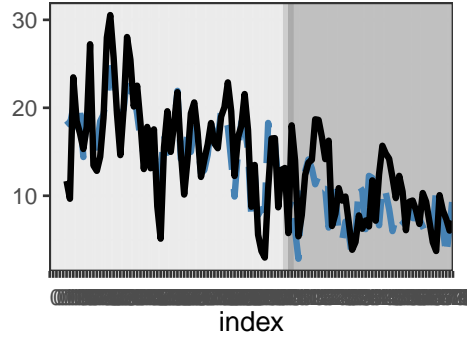

— Treated — Estimated Y(0)

### California

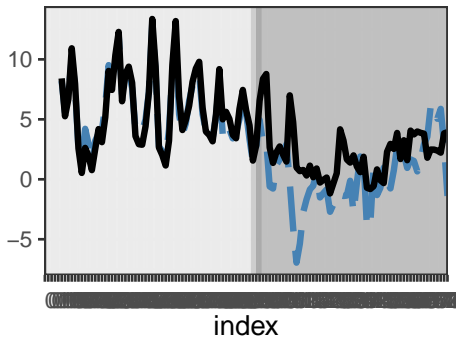

— Treated — Estimated Y(0)

### Arkansas

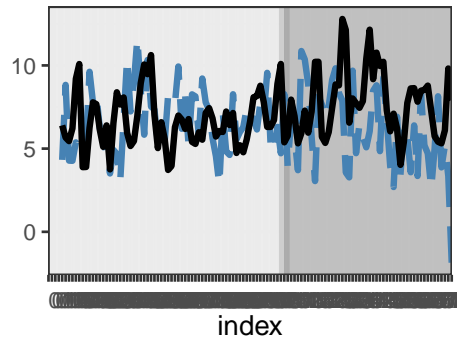

— Treated — Estimated Y(0)

### Georgia

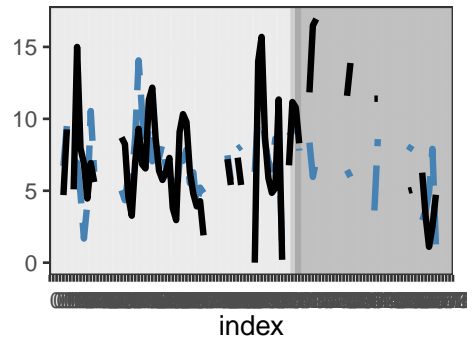

— Treated — Estimated Y(0)

### Ohio

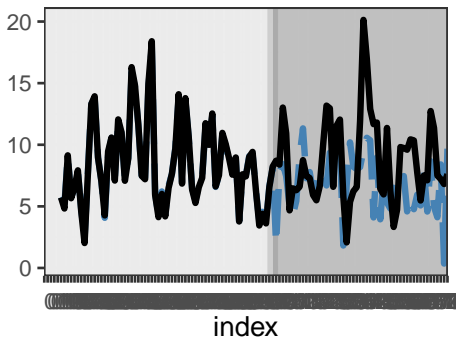

— Treated — Estimated Y(0)

### Ohio

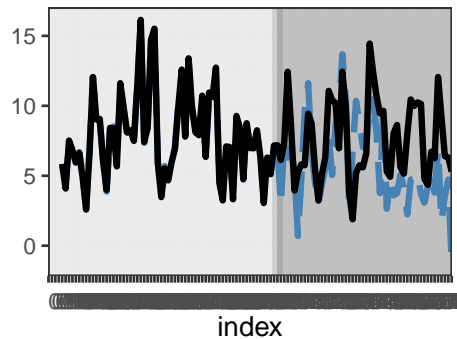

— Treated — Estimated Y(0)

### Utah

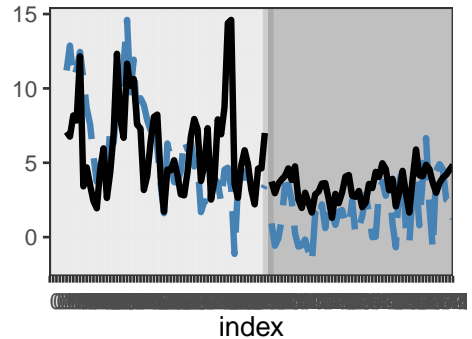

— Treated — Estimated Y(0)

### Delaware

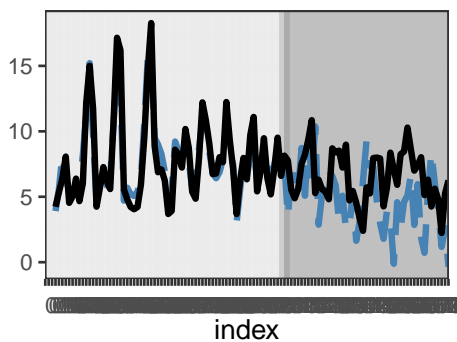

— Treated — Estimated Y(0)

### Maryland

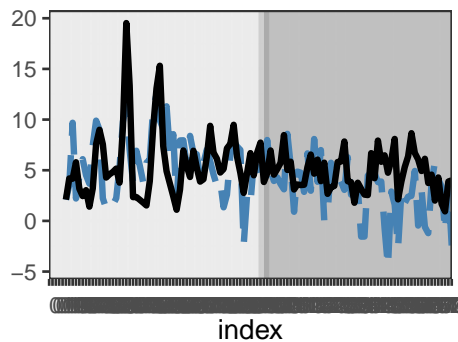

— Treated — Estimated Y(0)

### Pennsylvania

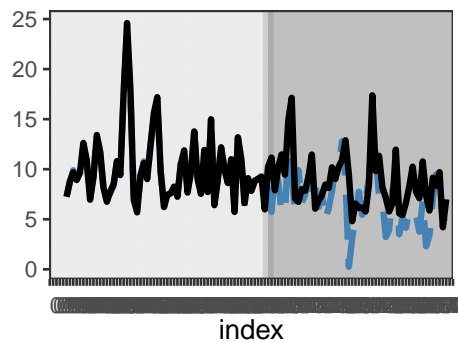

— Treated — Estimated Y(0)

### Connecticut

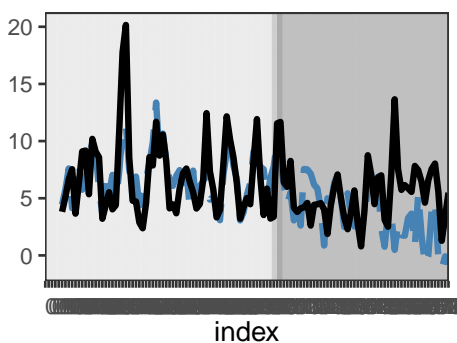

— Treated — Estimated Y(0)

### Illinois

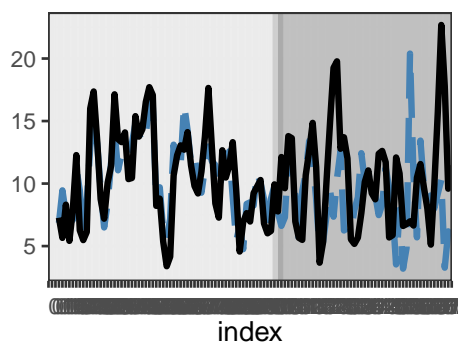

— Treated — Estimated Y(0)

### Virginia

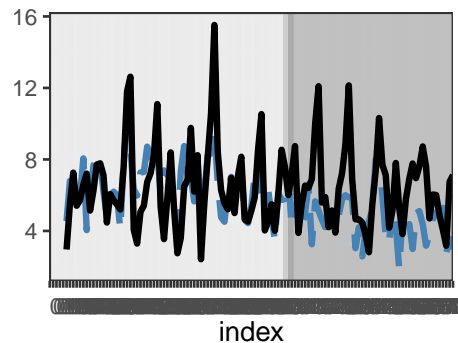

— Treated — Estimated Y(0)

### Nebraska

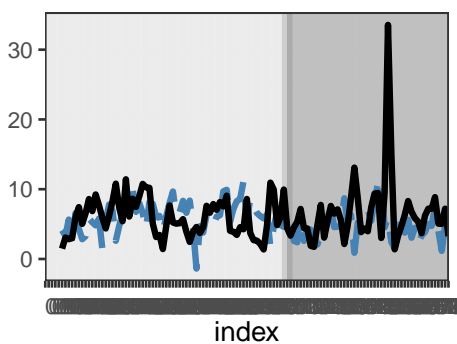

— Treated — Estimated Y(0)

### Indiana

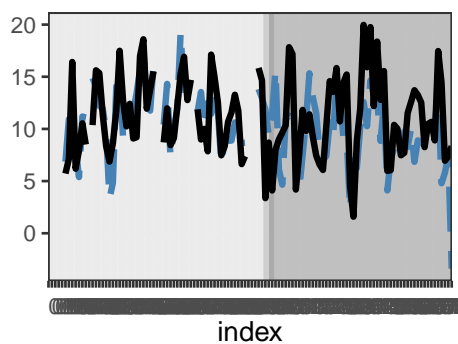

— Treated — Estimated Y(0)

### Nevada

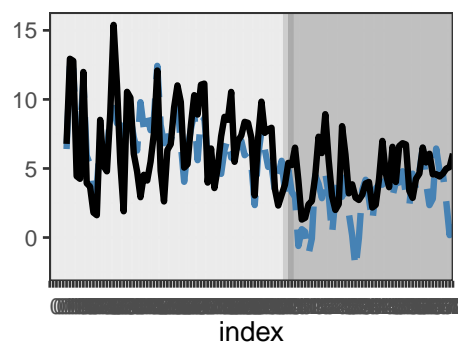

— Treated — Estimated Y(0)

### Vermont

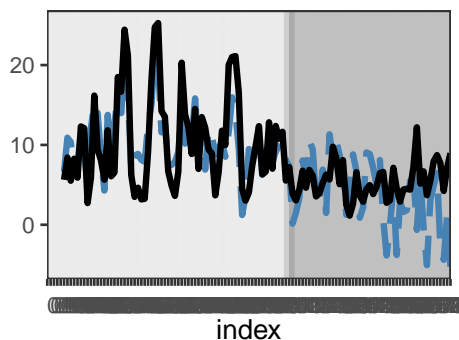

— Treated — Estimated Y(0)

### Illinois

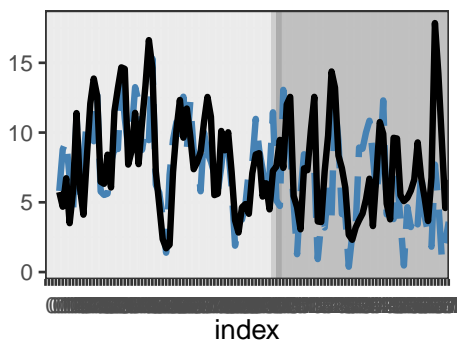

— Treated — Estimated Y(0)

### New Jersey

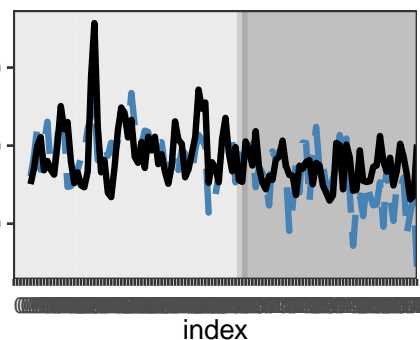

— Treated — Estimated Y(0)

### Minnesota

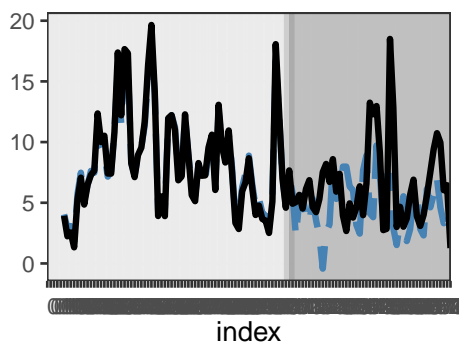

— Treated — Estimated Y(0)

### Kansas

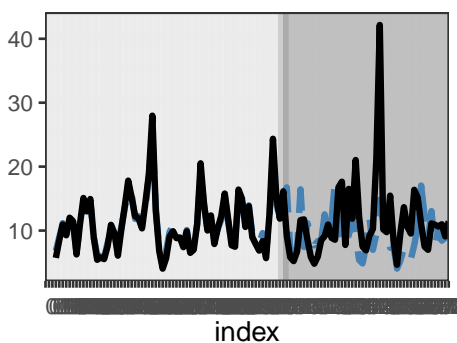

— Treated — Estimated Y(0)

### California

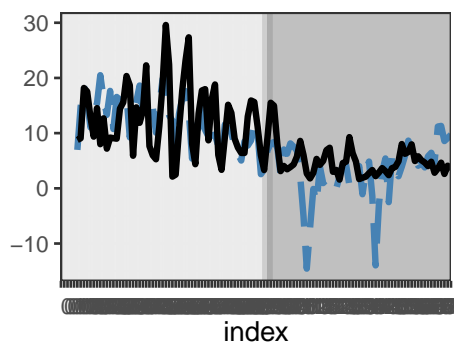

— Treated — Estimated Y(0)

### California

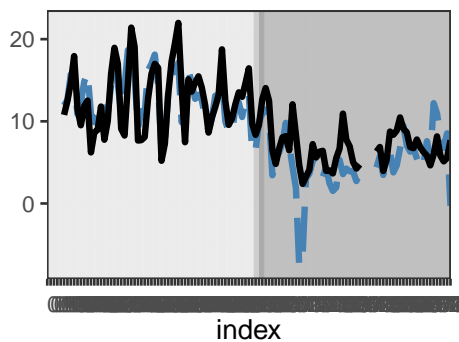

— Treated — Estimated Y(0)

### Oregon

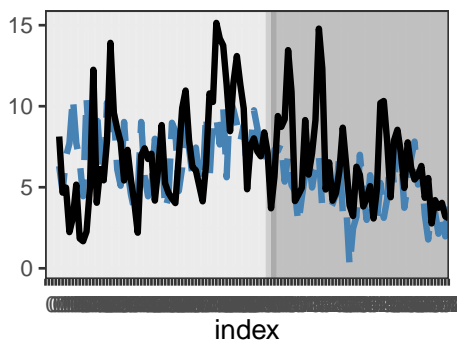

— Treated — Estimated Y(0)

### Maryland

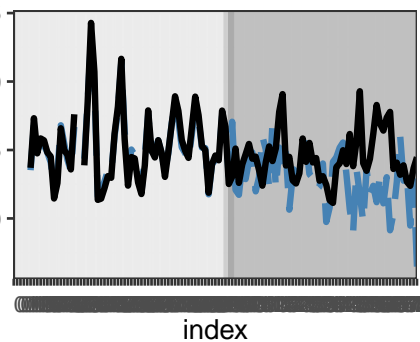

— Treated — Estimated Y(0)

### Minnesota

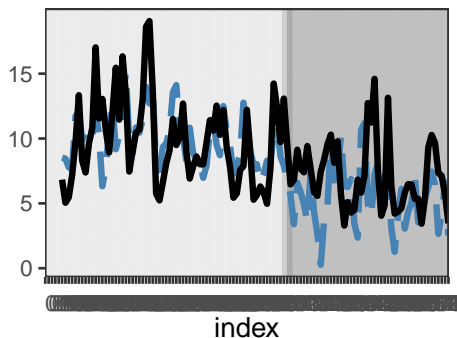

— Treated — Estimated Y(0)

### Missouri

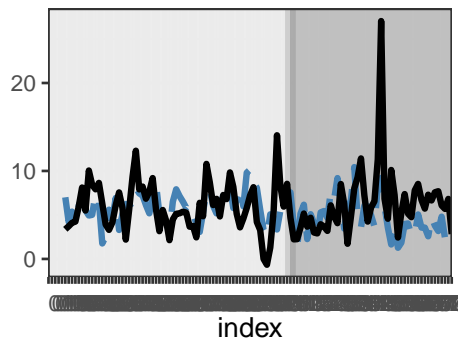

— Treated — Estimated Y(0)

### Oregon

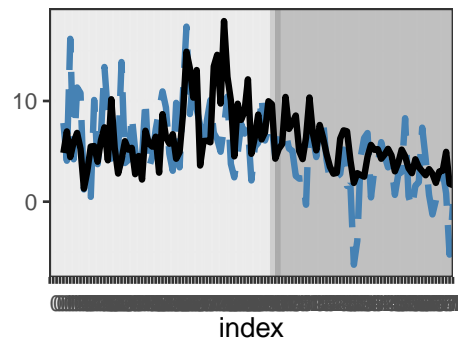

— Treated — Estimated Y(0)

### Pennsylvania

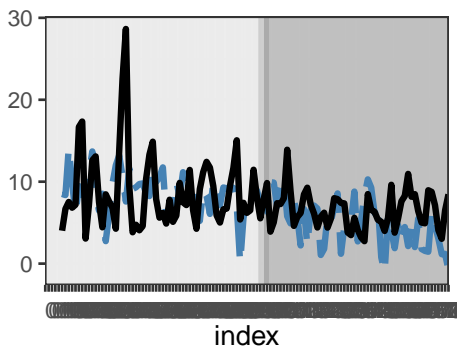

— Treated — Estimated Y(0)

### Indiana

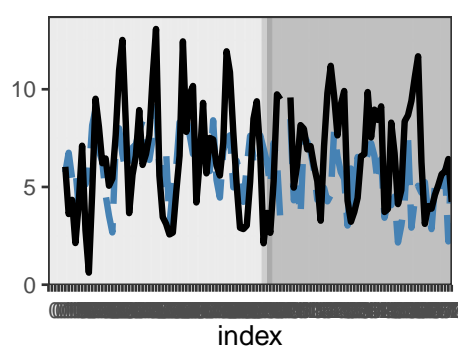

— Treated — Estimated Y(0)

### Louisiana

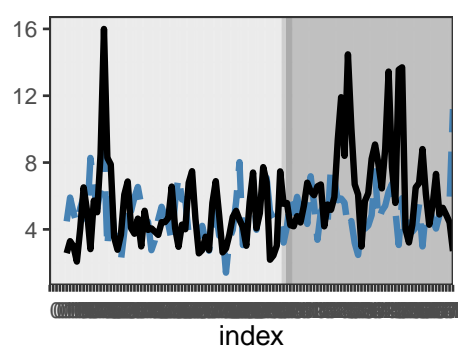

— Treated — Estimated Y(0)

### Idaho

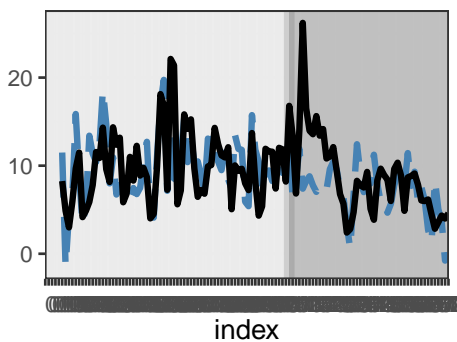

— Treated — Estimated Y(0)

### Kansas

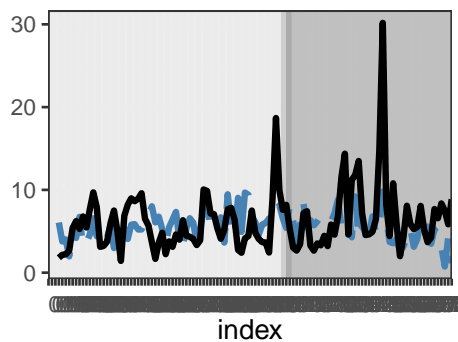

— Treated — Estimated Y(0)

### South Dakota

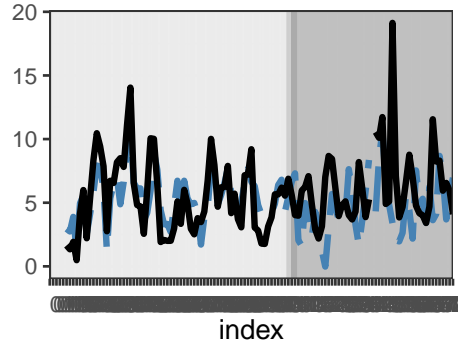

— Treated — Estimated Y(0)

### Massachusetts

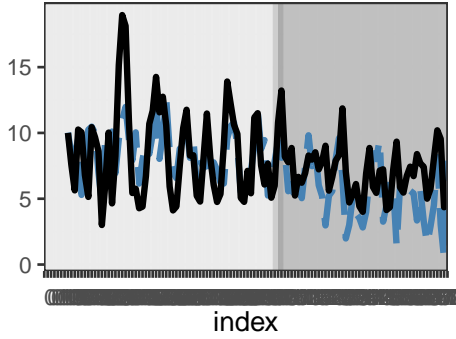

— Treated — Estimated Y(0)

### Connecticut

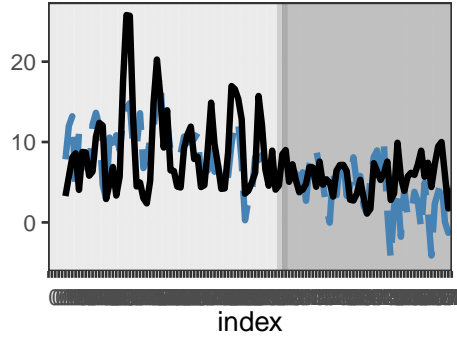

— Treated — Estimated Y(0)

### Pennsylvania

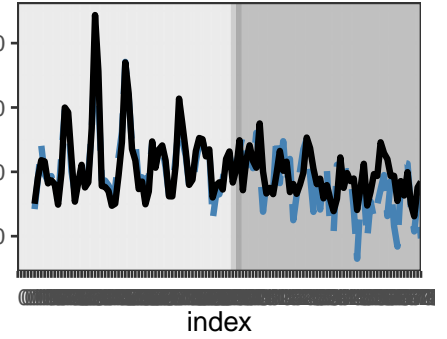

— Treated — Estimated Y(0)

### Illinois

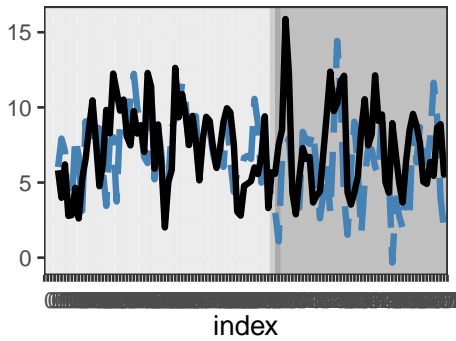

— Treated — Estimated Y(0)

### Pennsylvania

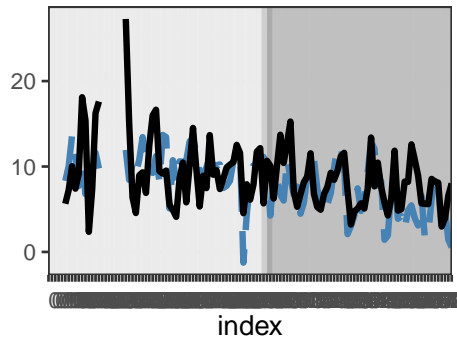

— Treated — Estimated Y(0)

### Pennsylvania

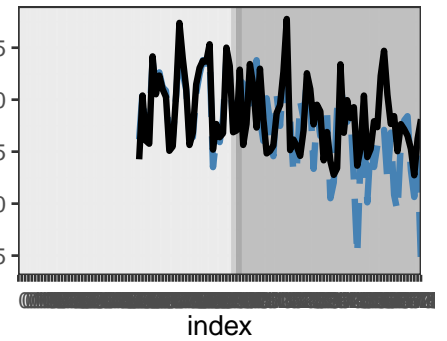

— Treated — Estimated Y(0)

### Iowa

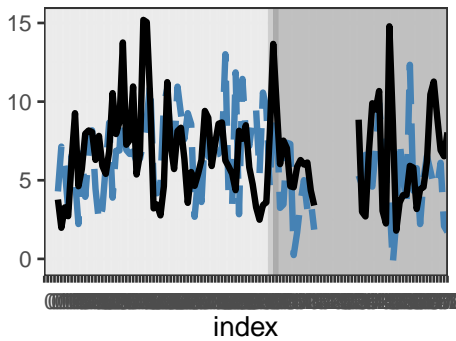

— Treated — Estimated Y(0)

### Washington

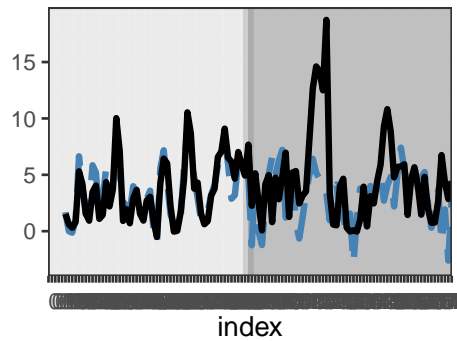

— Treated — Estimated Y(0)

### Oregon

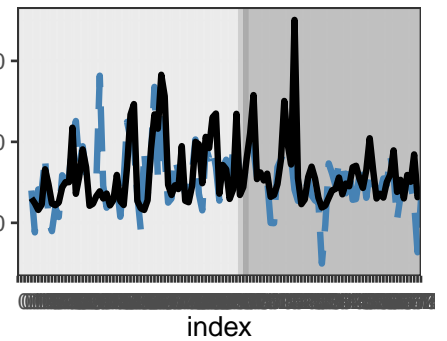

— Treated — Estimated Y(0)

### Texas

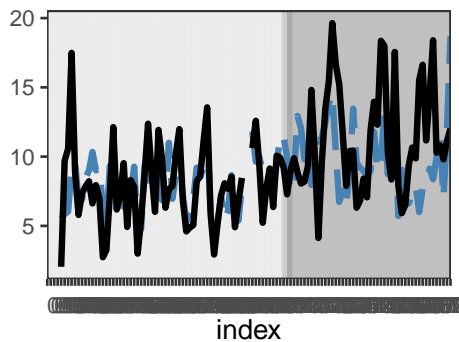

— Treated — Estimated Y(0)

### Oregon

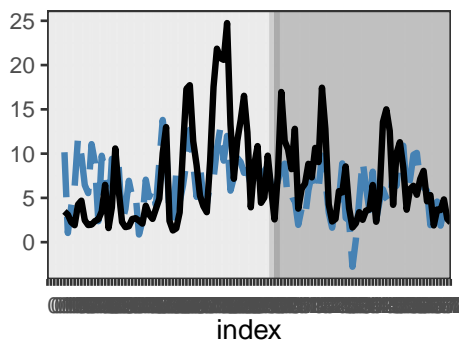

— Treated — Estimated Y(0)

### Idaho

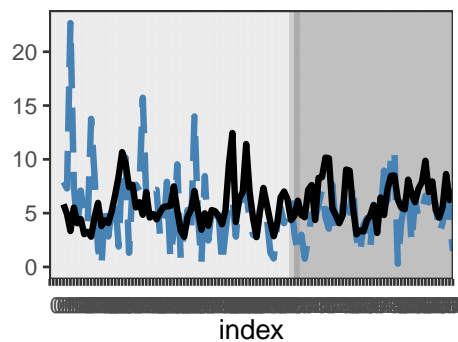

— Treated — Estimated Y(0)

### New Jersey

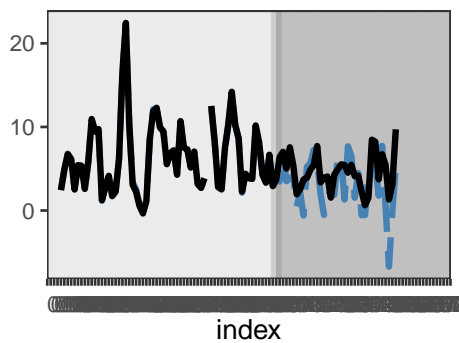

— Treated — Estimated Y(0)

### Virginia

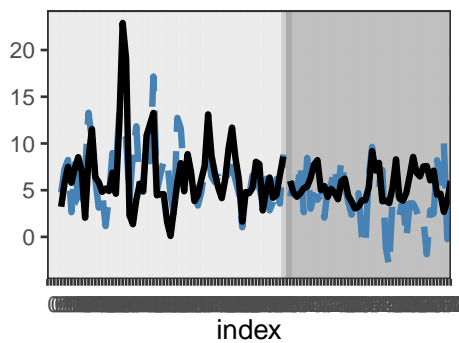

— Treated — Estimated Y(0)

### South Dakota

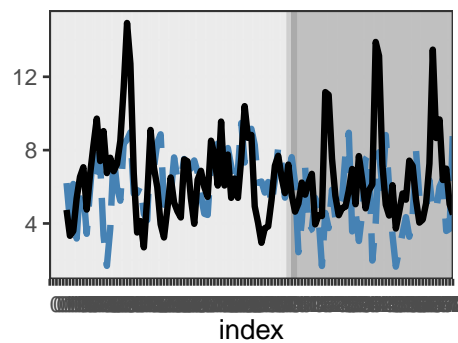

— Treated — Estimated Y(0)

### Ohio

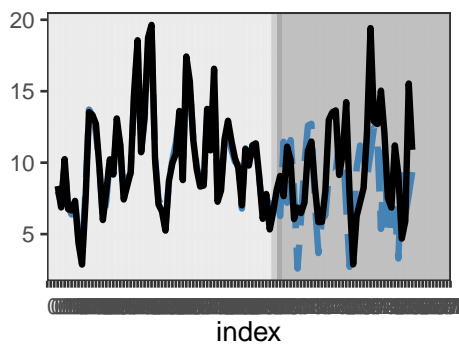

— Treated — Estimated Y(0)

### Maryland

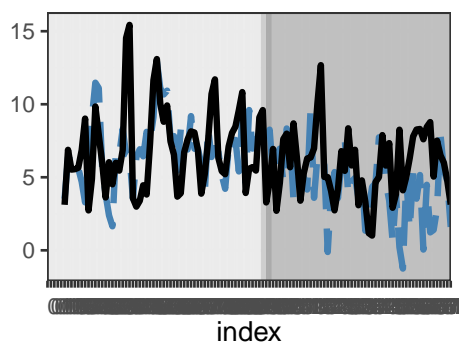

— Treated — Estimated Y(0)

### Virginia

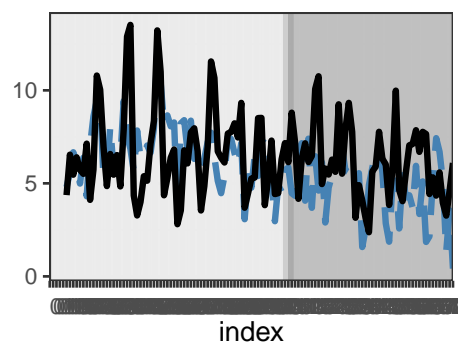

— Treated — Estimated Y(0)

### Utah

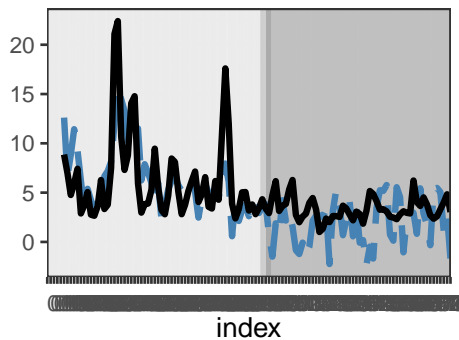

— Treated — Estimated Y(0)

### Maryland

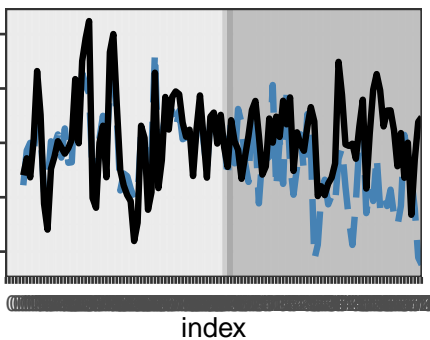

— Treated — Estimated Y(0)

### Massachusetts

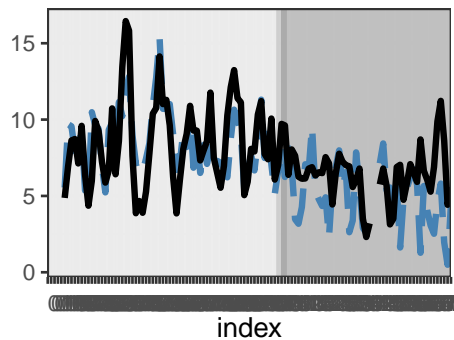

— Treated — Estimated Y(0)

### Kentucky

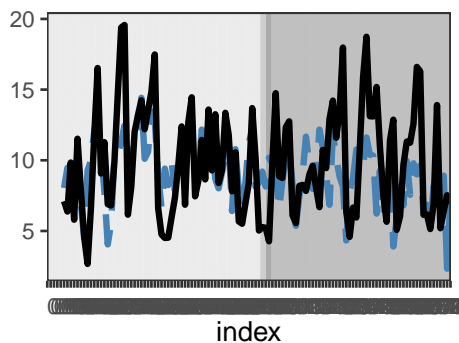

— Treated — Estimated Y(0)

### Nebraska

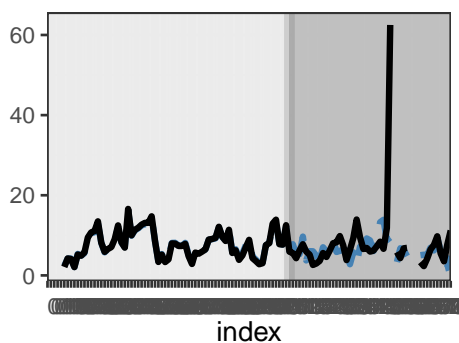

— Treated — Estimated Y(0)

### Pennsylvania

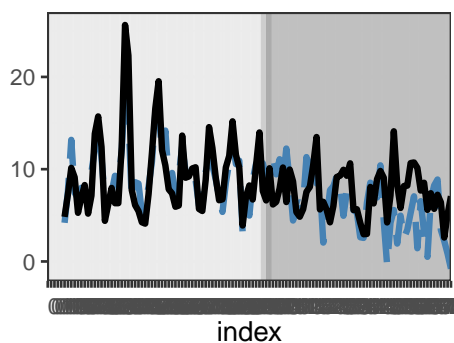

— Treated — Estimated Y(0)

### Florida

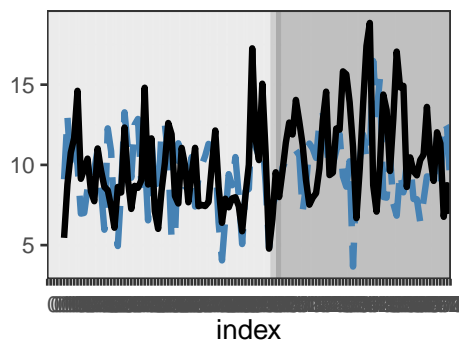

— Treated — Estimated Y(0)

### Kentucky

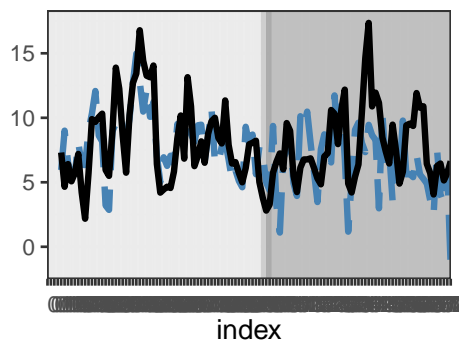

— Treated — Estimated Y(0)

### New Hampshire

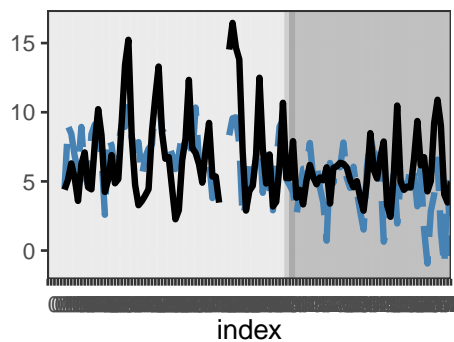

— Treated — Estimated Y(0)



### Montana

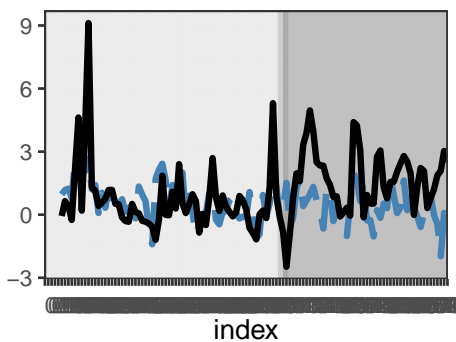

— Treated — Estimated Y(0)

### Pennsylvania

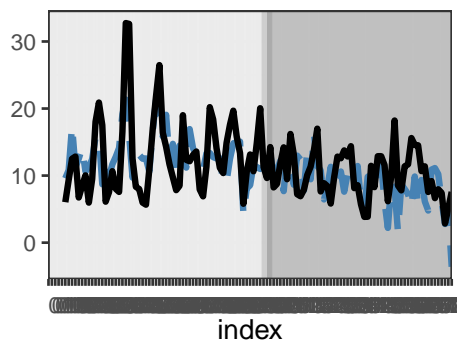

— Treated — Estimated Y(0)

### Tennessee

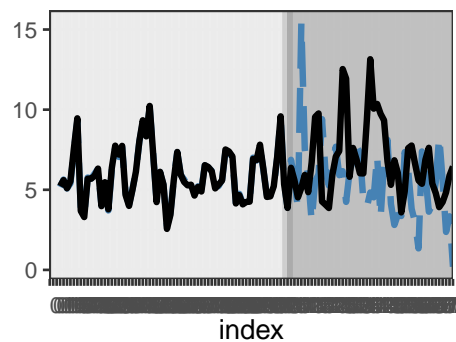

— Treated — Estimated Y(0)

### Rhode Island

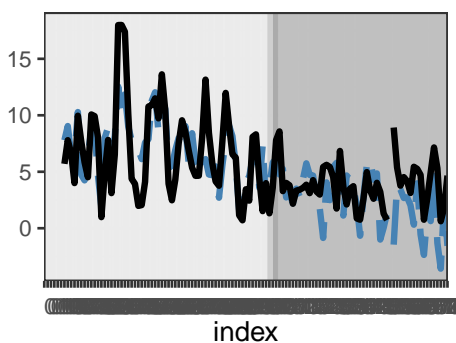

— Treated — Estimated Y(0)

### North Carolina

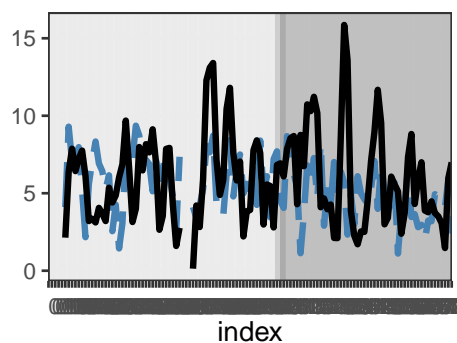

— Treated — Estimated Y(0)

### Virginia

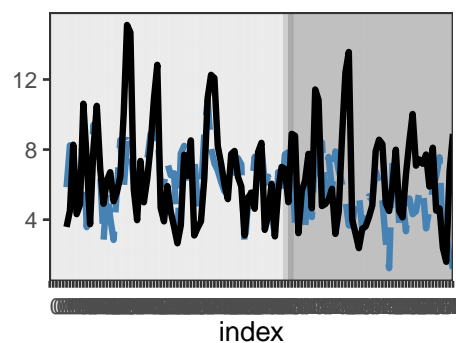

— Treated — Estimated Y(0)

### North Carolina

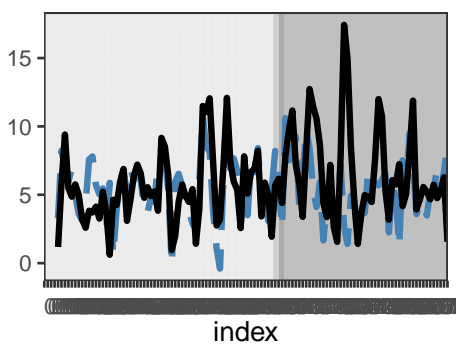

— Treated — Estimated Y(0)

### Kentucky

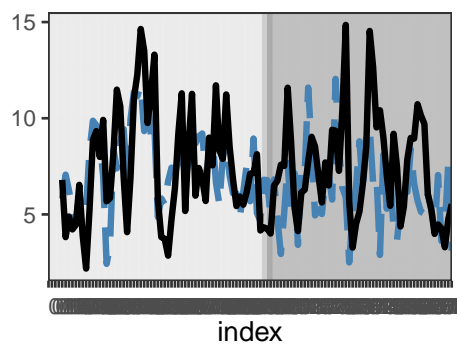

— Treated — Estimated Y(0)

### North Carolina

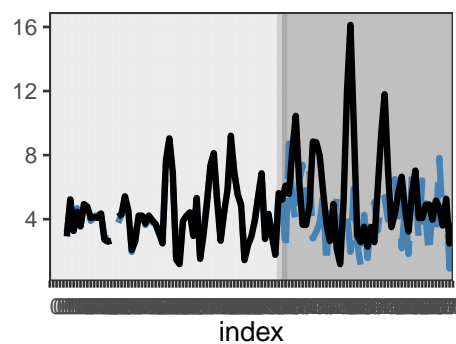

— Treated — Estimated Y(0)

### Texas

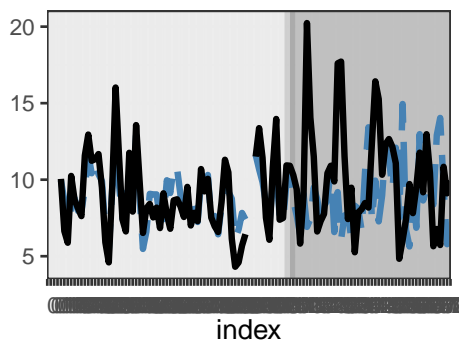

— Treated — Estimated Y(0)

### Washington

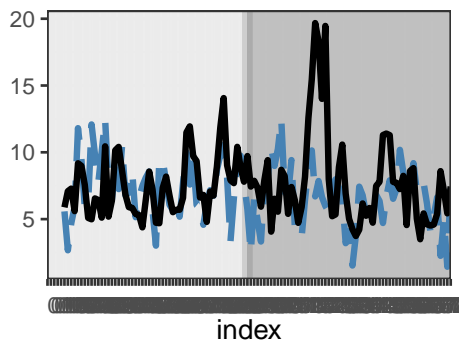

— Treated — Estimated Y(0)

### Illinois

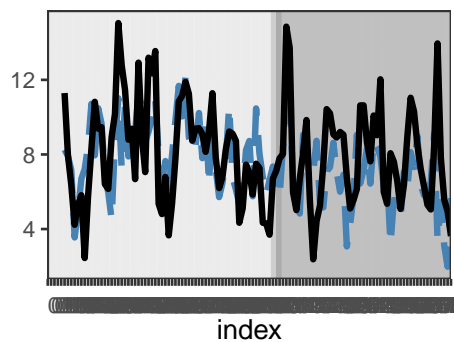

— Treated — Estimated Y(0)

### Tennessee

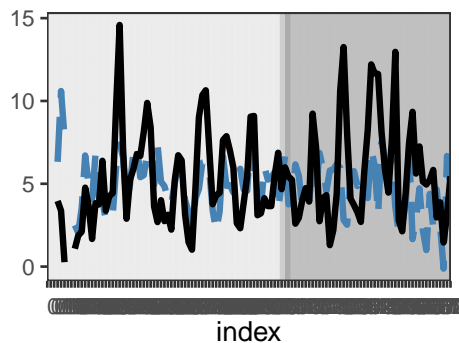

— Treated — Estimated Y(0)

### Ohio

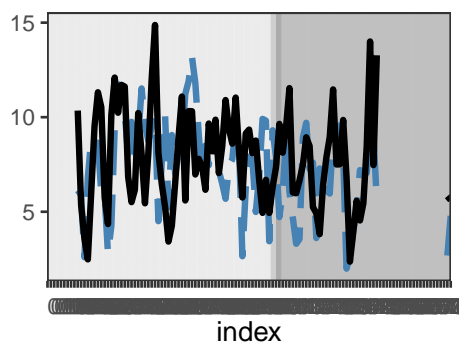

— Treated — Estimated Y(0)

### Connecticut

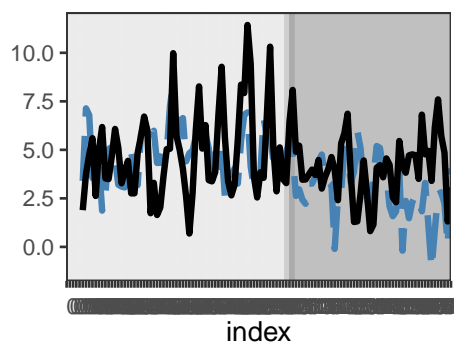

— Treated — Estimated Y(0)

### Arkansas

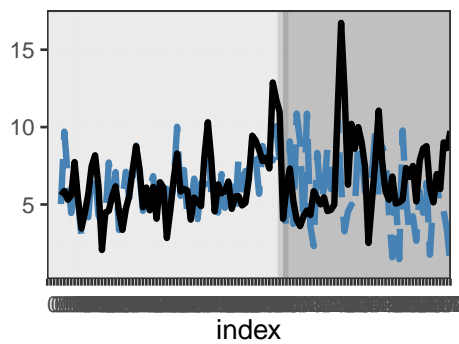

— Treated — Estimated Y(0)

### Pennsylvania

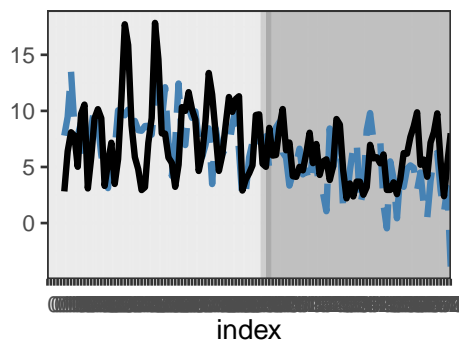

— Treated — Estimated Y(0)

### Kentucky

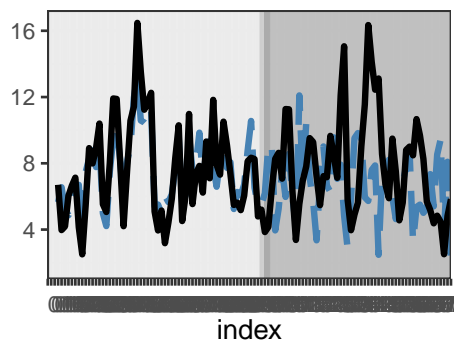

— Treated — Estimated Y(0)

### Indiana

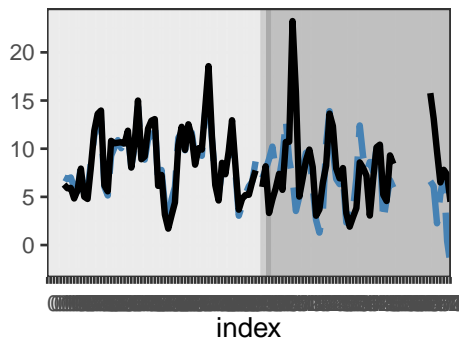

— Treated — Estimated Y(0)

### Montana

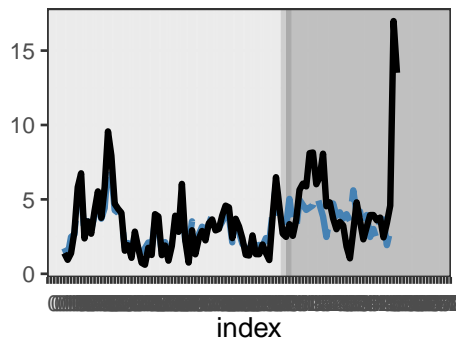

— Treated — Estimated Y(0)

### Washington

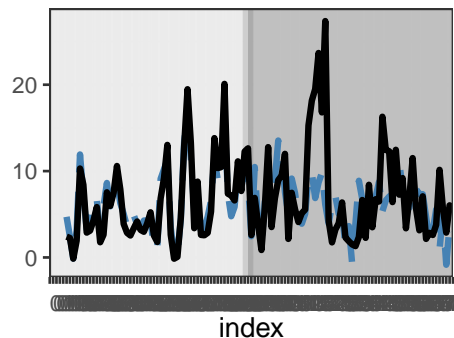

— Treated — Estimated Y(0)

### Maryland

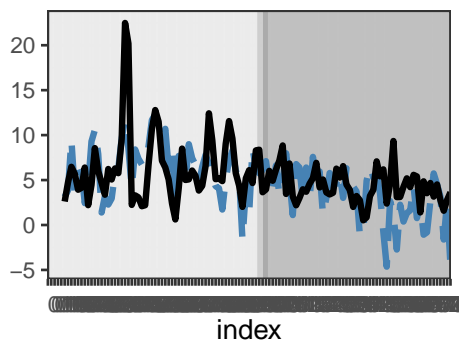

— Treated — Estimated Y(0)

### Missouri

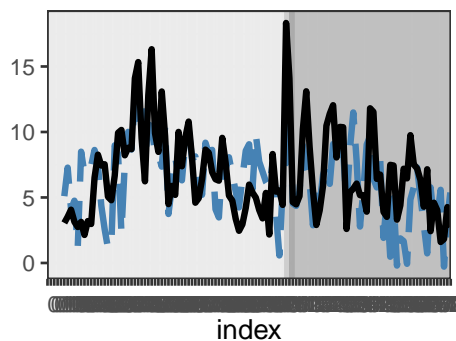

— Treated — Estimated Y(0)

### California

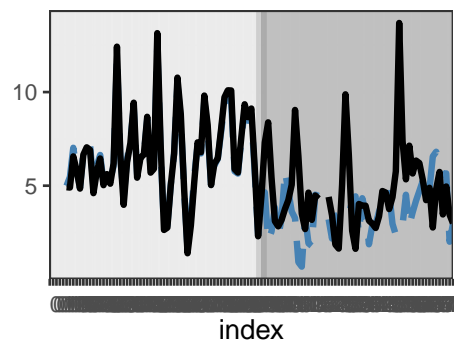

— Treated — Estimated Y(0)

### South Carolina

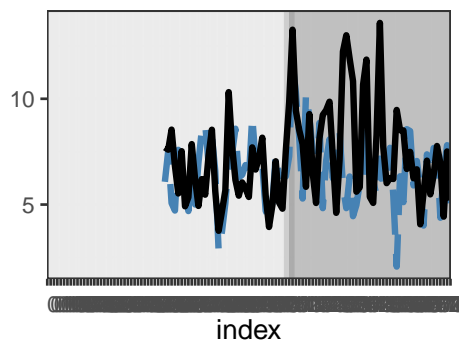

— Treated — Estimated Y(0)

### Massachusetts

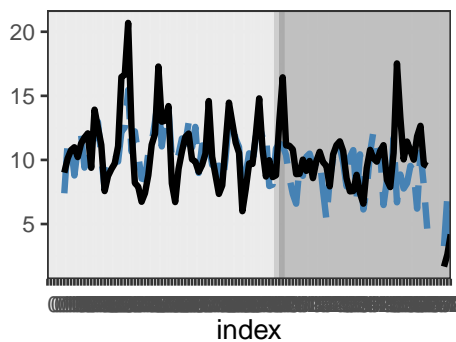

— Treated — Estimated Y(0)

### South Carolina

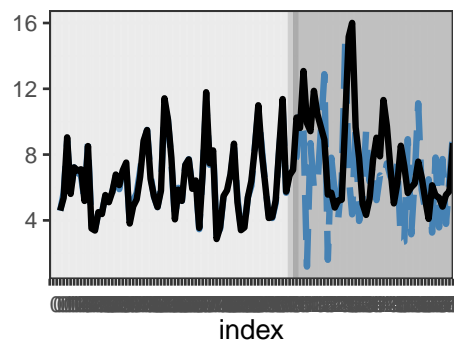

— Treated — Estimated Y(0)

### North Carolina

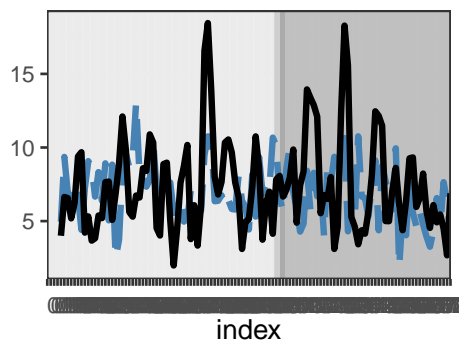

— Treated — Estimated Y(0)

### Montana

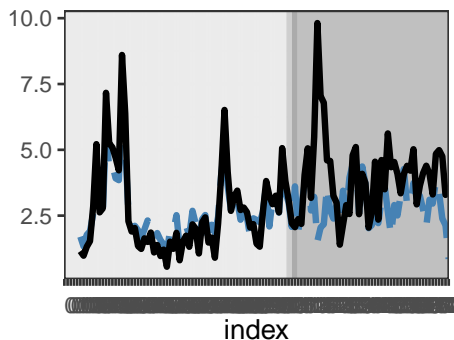

— Treated — Estimated Y(0)

### Nevada

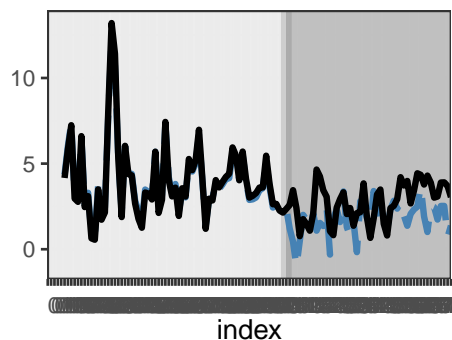

— Treated — Estimated Y(0)

### Arkansas

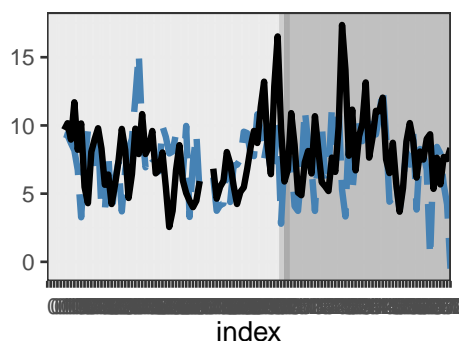

— Treated — Estimated Y(0)

### Wyoming

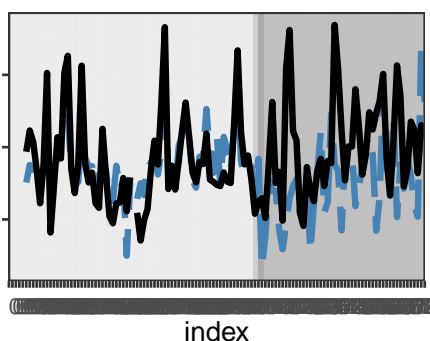

— Treated — Estimated Y(0)

### Connecticut

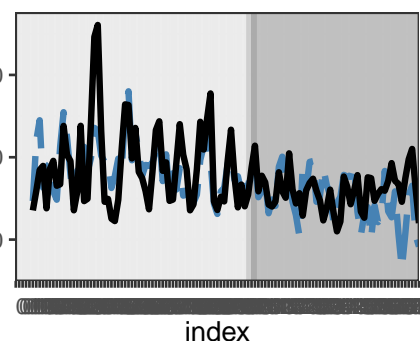

— Treated — Estimated Y(0)

### Ohio

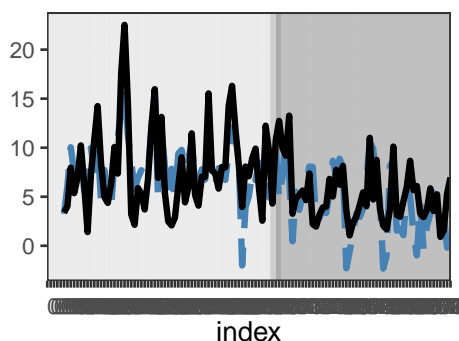

— Treated — Estimated Y(0)

### North Dakota

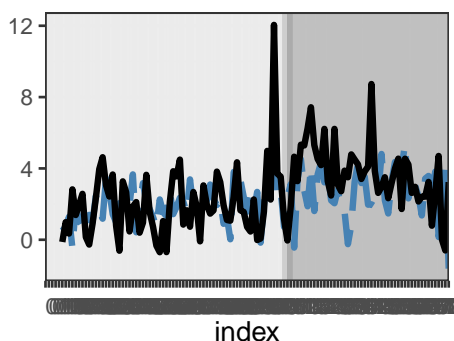

— Treated — Estimated Y(0)

### New Jersey

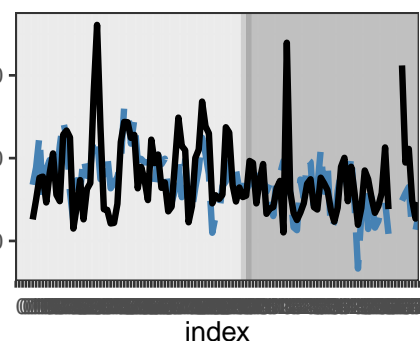

— Treated — Estimated Y(0)

### Rhode Island

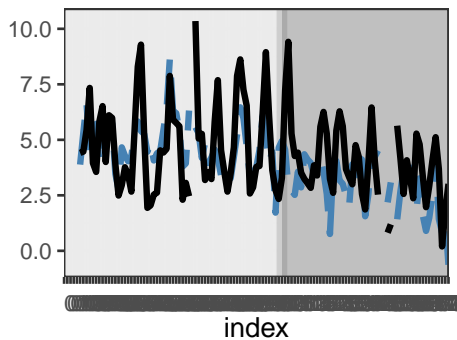

— Treated — Estimated Y(0)

### Maine

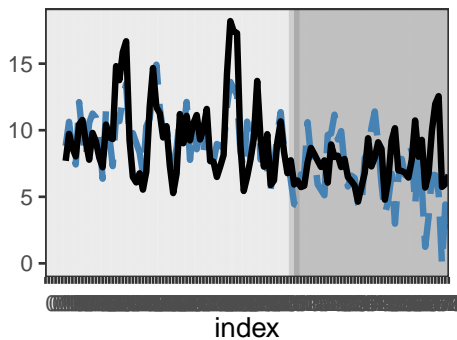

— Treated — Estimated Y(0)

### North Carolina

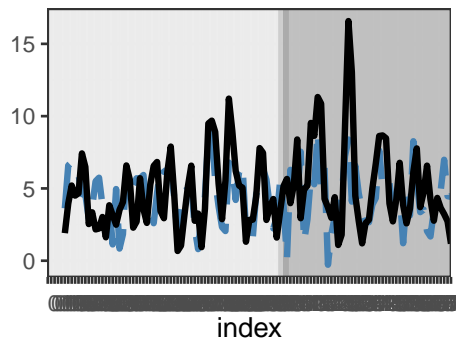

— Treated — Estimated Y(0)

### Missouri

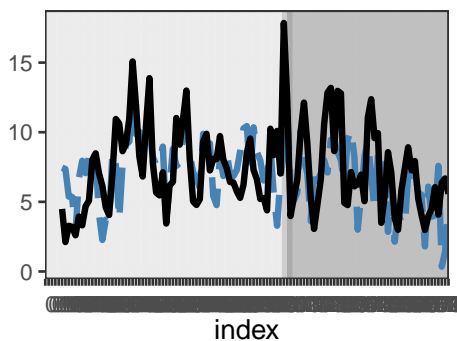

— Treated — Estimated Y(0)

### Minnesota

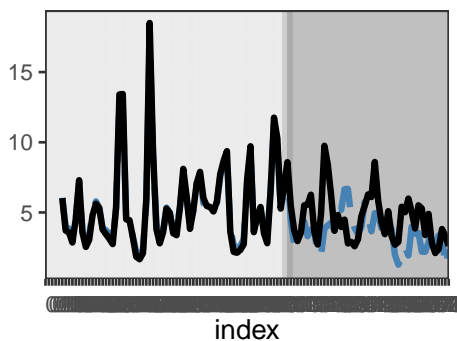

— Treated — Estimated Y(0)

### Oklahoma

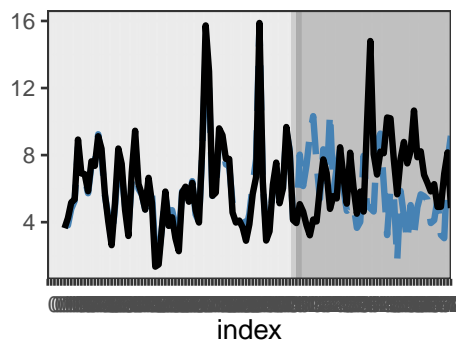

— Treated — Estimated Y(0)

### Missouri

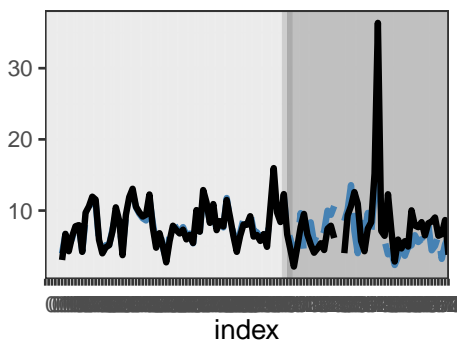

— Treated — Estimated Y(0)

### South Dakota

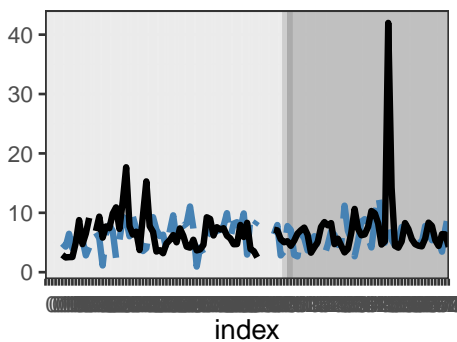

— Treated — Estimated Y(0)

### Utah

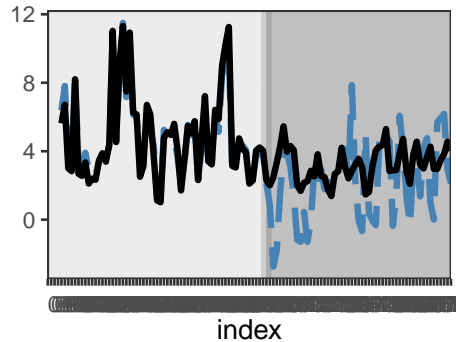

— Treated — Estimated Y(0)

### New Jersey

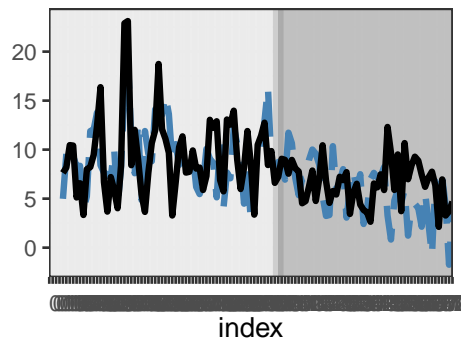

— Treated — Estimated Y(0)

### Maryland

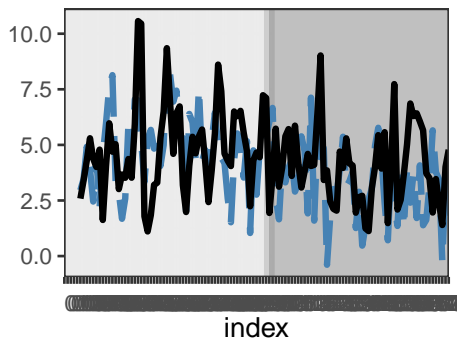

— Treated — Estimated Y(0)

### Missouri

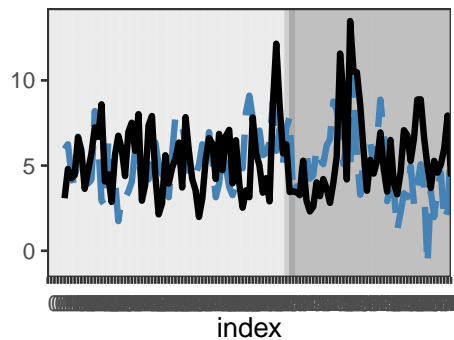

— Treated — Estimated Y(0)

### Washington

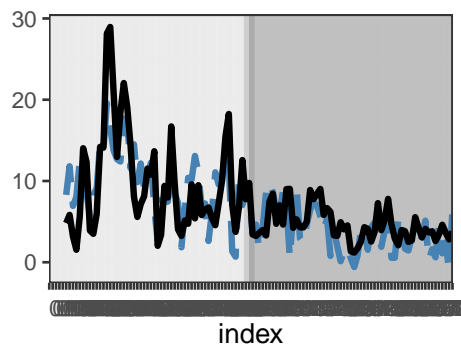

— Treated — Estimated Y(0)

### Maryland

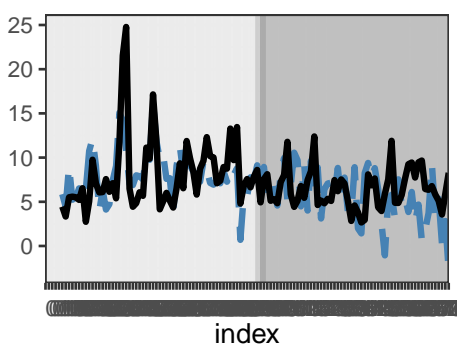

— Treated — Estimated Y(0)

### Florida

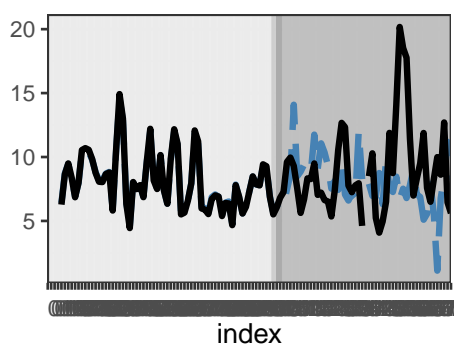

— Treated — Estimated Y(0)

### Missouri

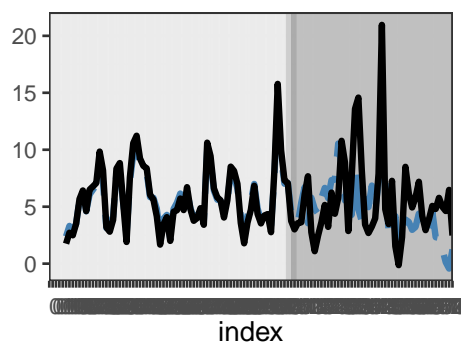

— Treated — Estimated Y(0)

### Alabama

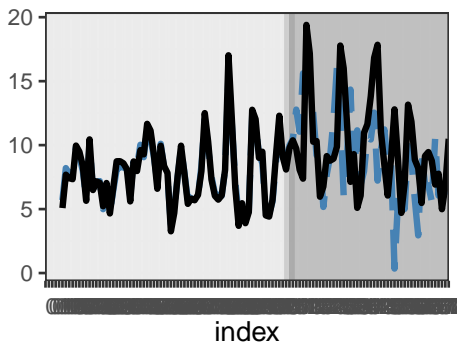

— Treated — Estimated Y(0)

### Florida

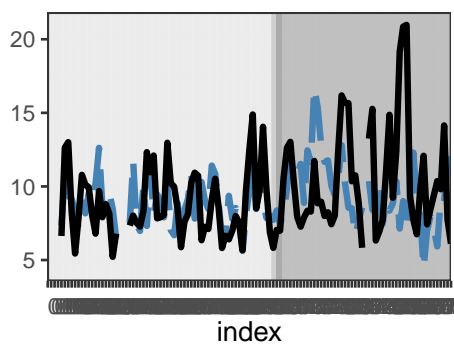

— Treated — Estimated Y(0)

### Washington

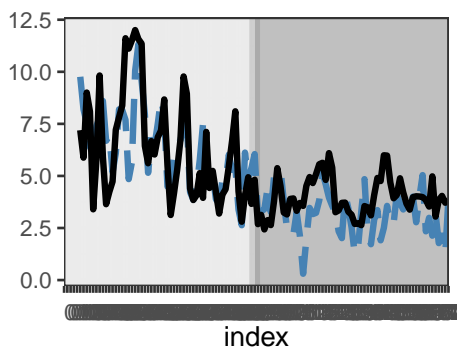

— Treated — Estimated Y(0)

### Tennessee

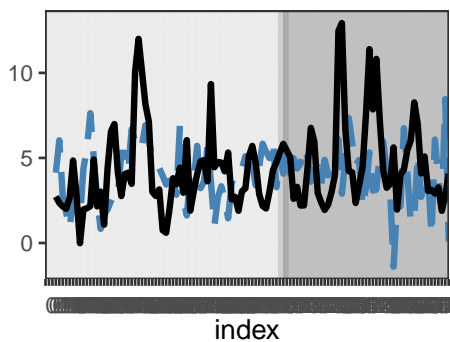

— Treated — Estimated Y(0)

### New Jersey

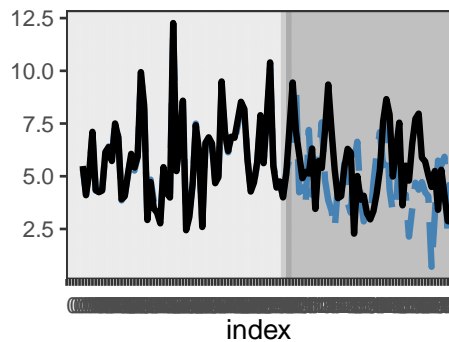

— Treated — Estimated Y(0)

### Iowa

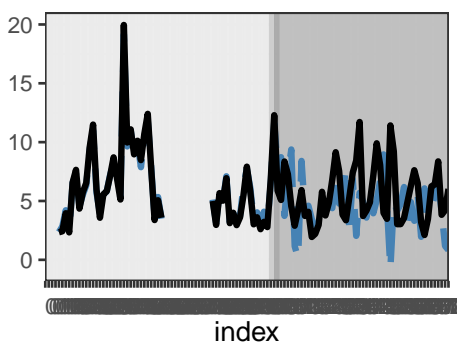

— Treated — Estimated Y(0)

### Rhode Island

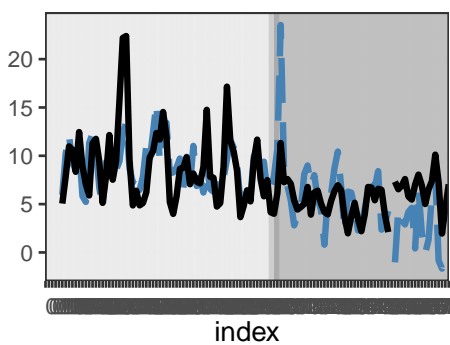

— Treated — Estimated Y(0)

### North Carolina

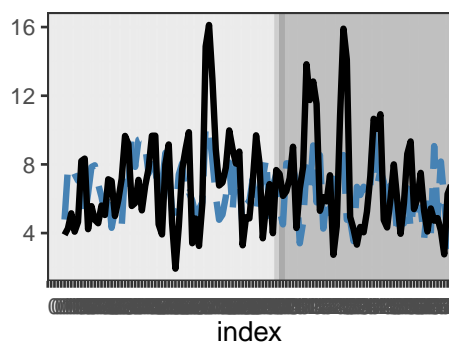

— Treated — Estimated Y(0)

### Oregon

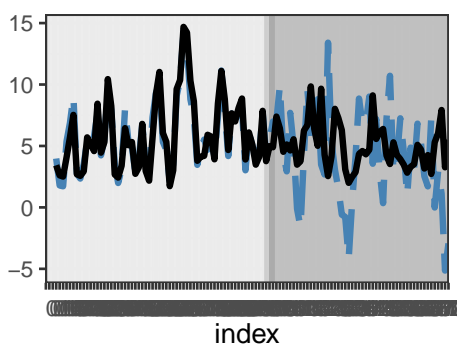

— Treated — Estimated Y(0)

### North Dakota

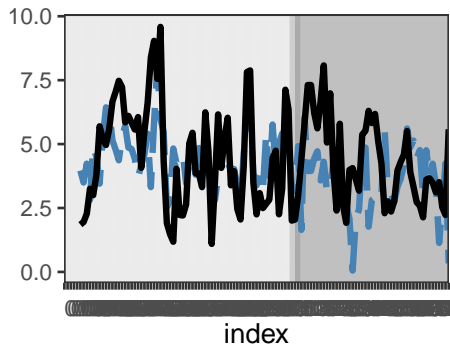

— Treated — Estimated Y(0)

### Kentucky

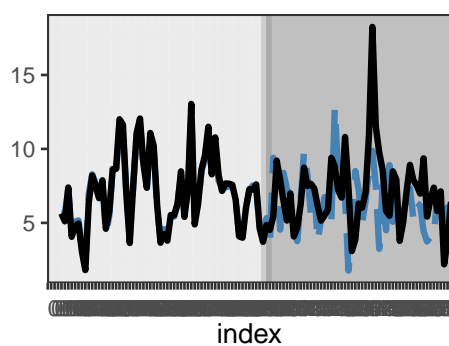

— Treated — Estimated Y(0)

### New York

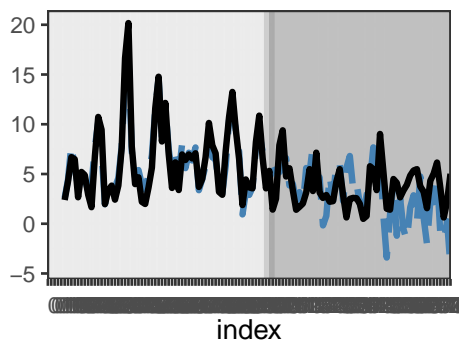

— Treated — Estimated Y(0)

### Pennsylvania

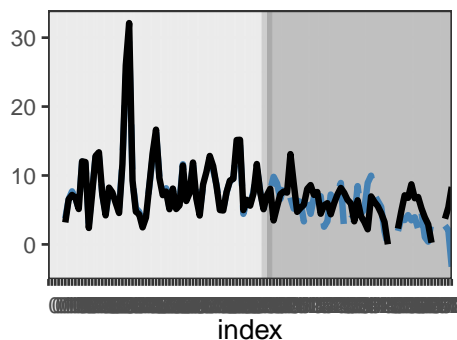

— Treated — Estimated Y(0)

### Tennessee

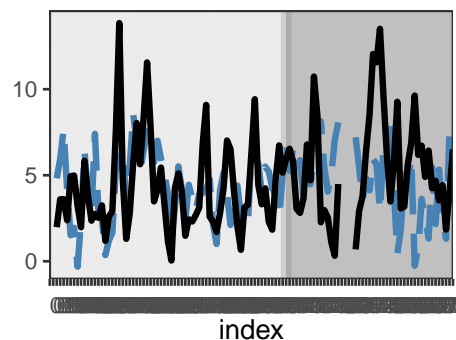

— Treated — Estimated Y(0)

### New Jersey

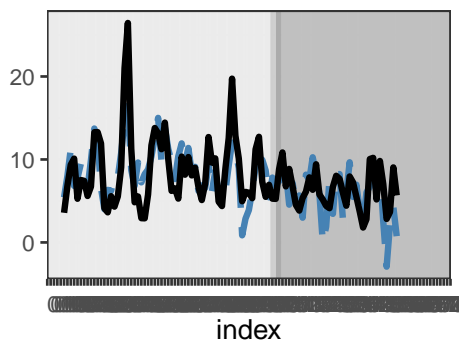

— Treated — Estimated Y(0)

### California

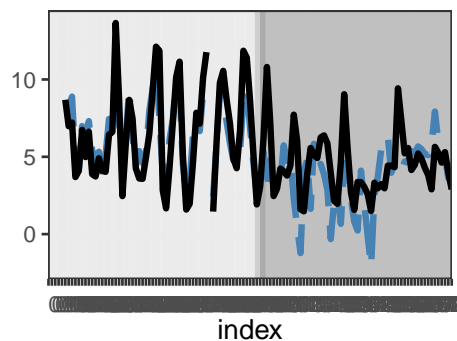

— Treated — Estimated Y(0)

### Washington

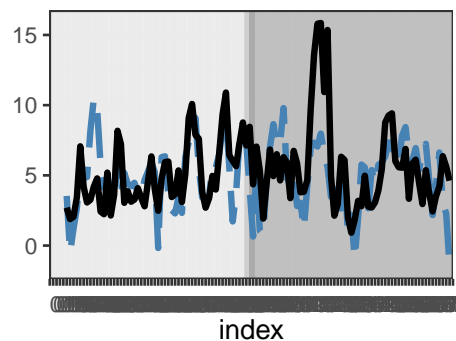

— Treated — Estimated Y(0)

### Washington

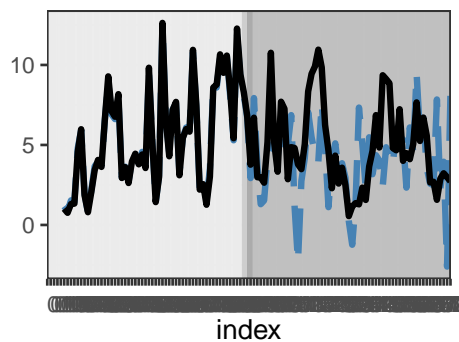

— Treated — Estimated Y(0)

### Georgia

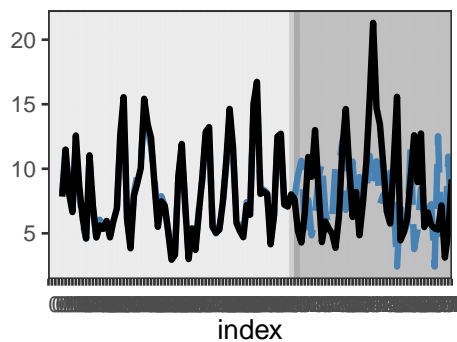

— Treated — Estimated Y(0)

### North Carolina

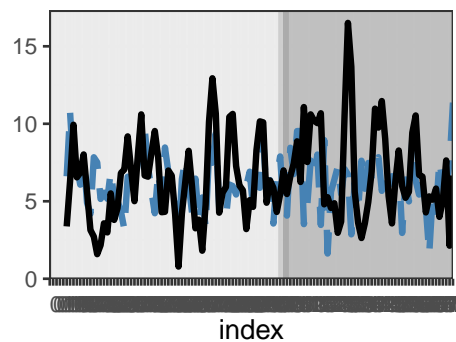

— Treated — Estimated Y(0)



### Maryland

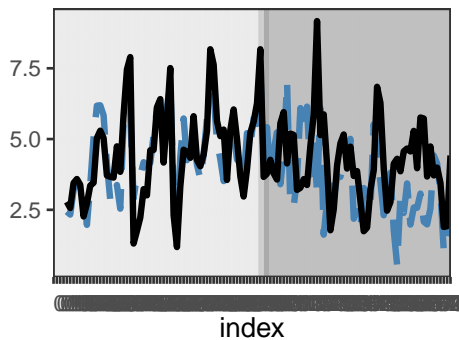

— Treated — Estimated Y(0)

### Pennsylvania

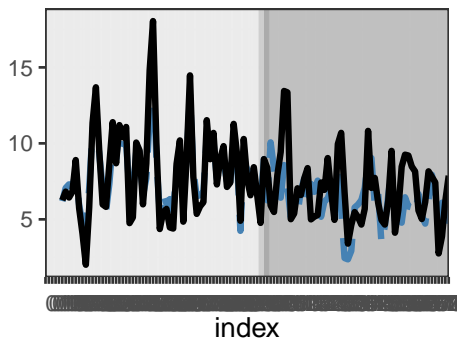

— Treated — Estimated Y(0)

### New Jersey

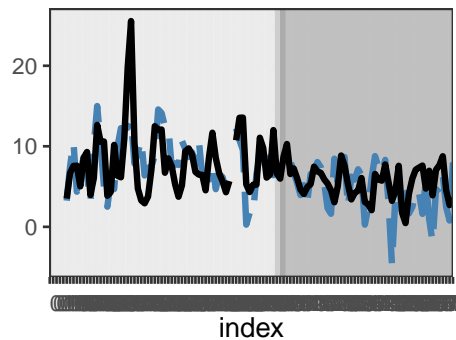

— Treated — Estimated Y(0)

### South Dakota

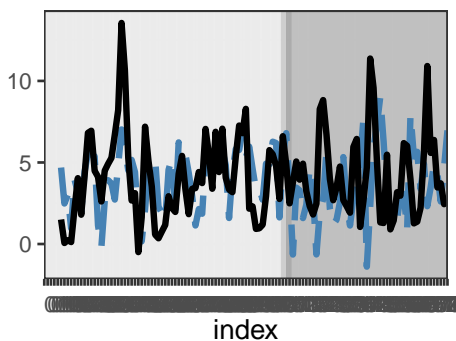

— Treated — Estimated Y(0)

### California

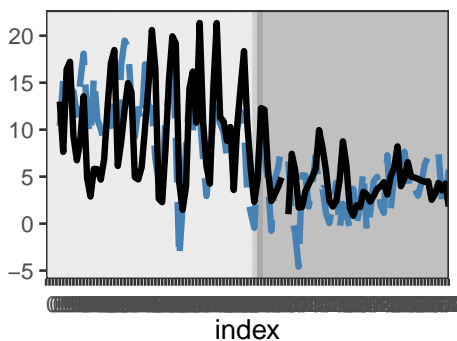

— Treated — Estimated Y(0)

### Oklahoma

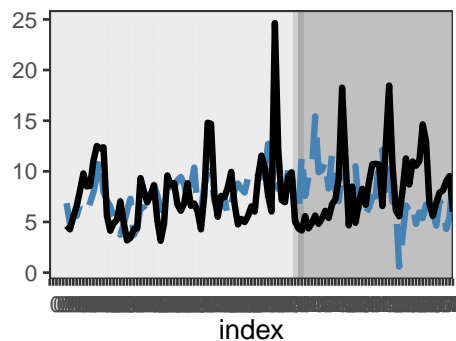

— Treated — Estimated Y(0)

### Oklahoma

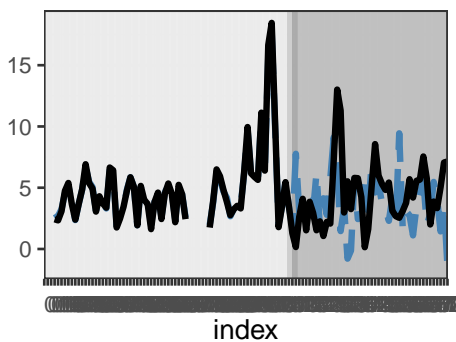

— Treated — Estimated Y(0)

### Minnesota

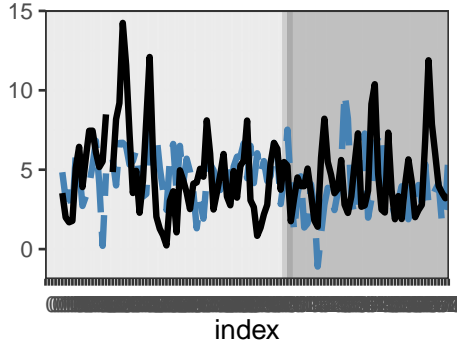

— Treated — Estimated Y(0)

### Oklahoma

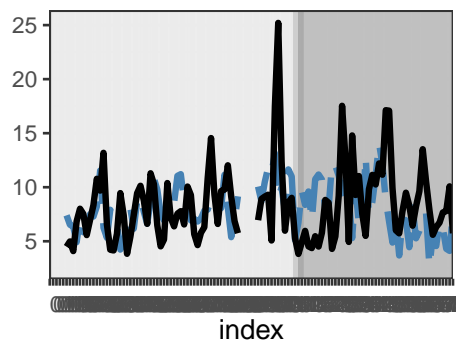

— Treated — Estimated Y(0)

### New Hampshire

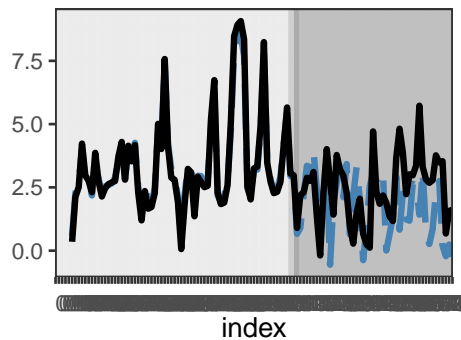

— Treated — Estimated Y(0)

### California

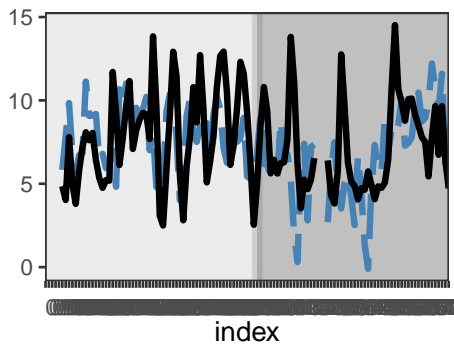

— Treated — Estimated Y(0)

### Tennessee

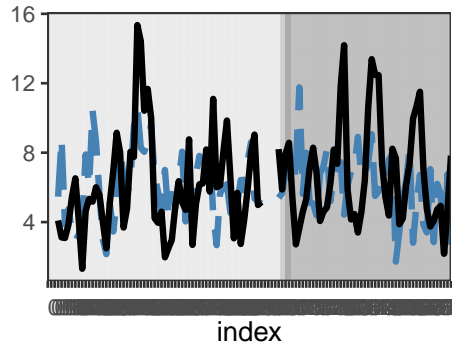

— Treated — Estimated Y(0)

### Nevada

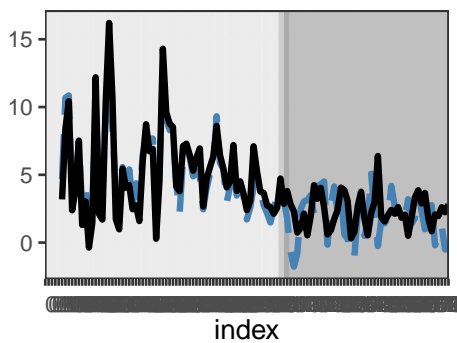

— Treated — Estimated Y(0)

### Massachusetts

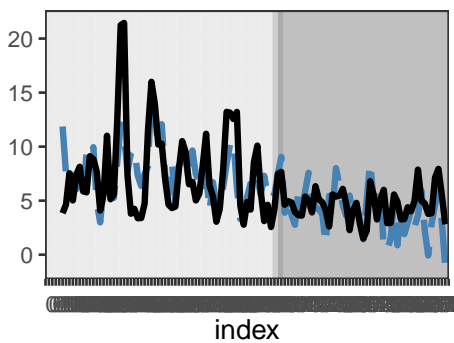

— Treated — Estimated Y(0)

### Massachusetts

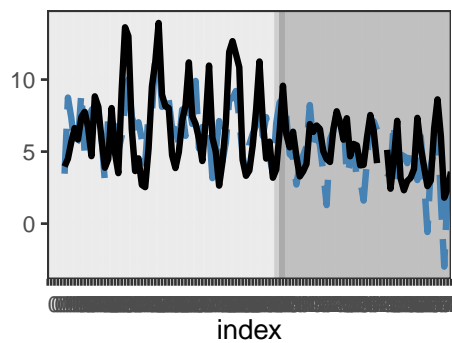

— Treated — Estimated Y(0)

### Colorado

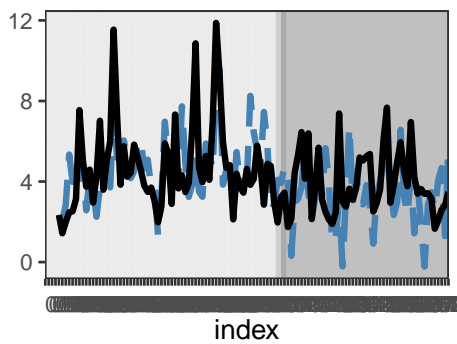

— Treated — Estimated Y(0)

### Missouri

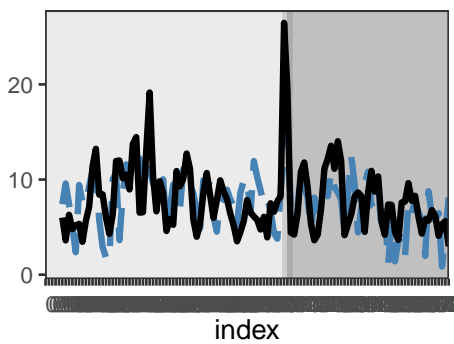

— Treated — Estimated Y(0)

### California

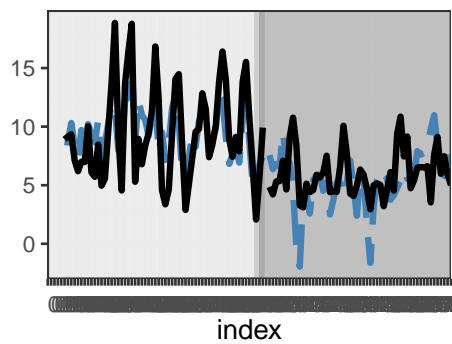

— Treated — Estimated Y(0)

### Alabama

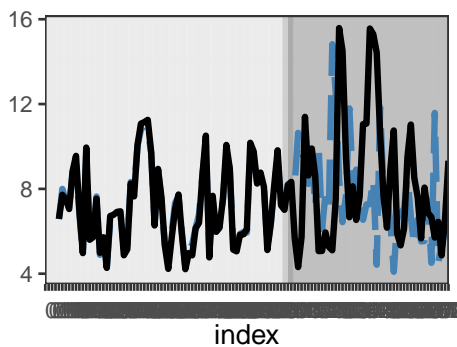

— Treated — Estimated Y(0)

### Tennessee

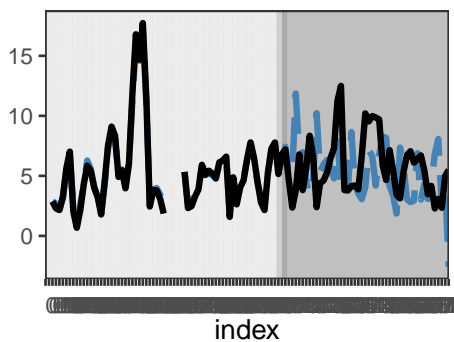

— Treated — Estimated Y(0)

### Pennsylvania

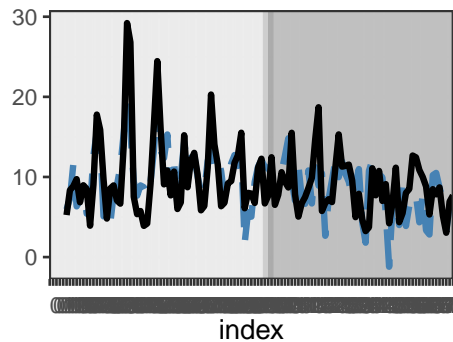

— Treated — Estimated Y(0)

### Florida

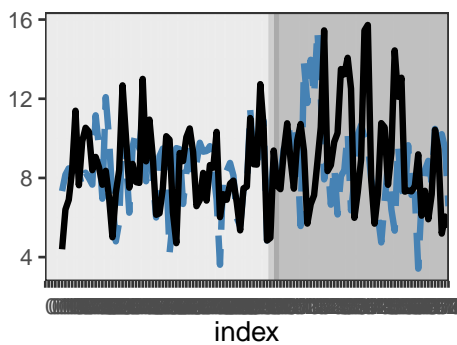

— Treated — Estimated Y(0)

### North Dakota

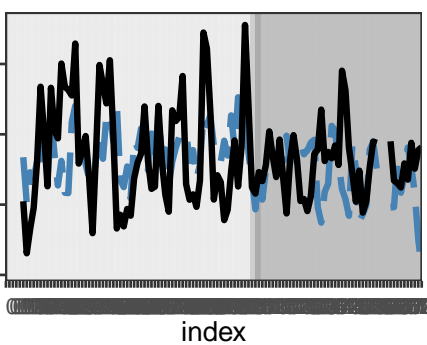

— Treated — Estimated Y(0)

### South Dakota

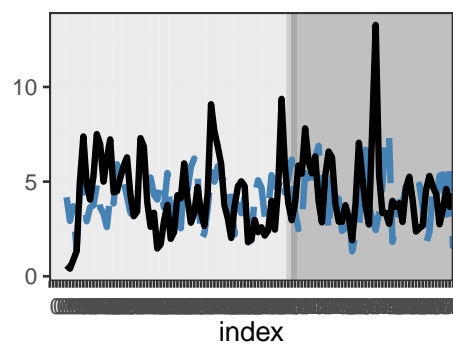

— Treated — Estimated Y(0)

### Tennessee

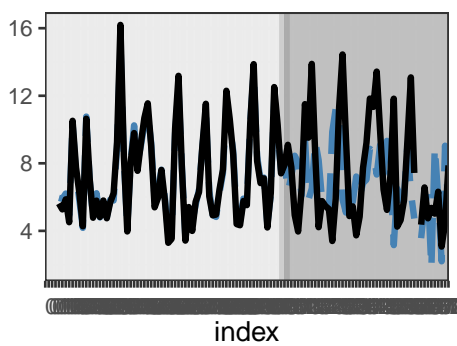

— Treated — Estimated Y(0)

### Washington

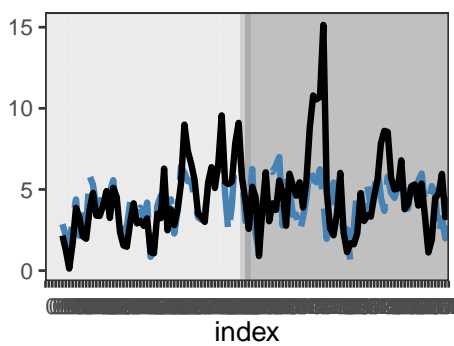

— Treated — Estimated Y(0)

### Virginia

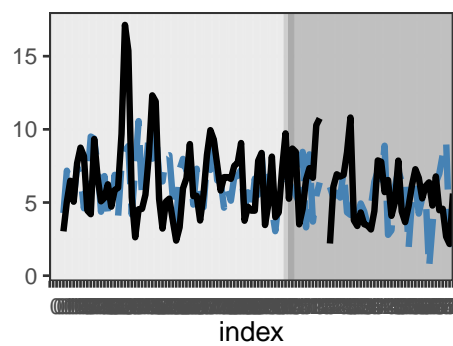

— Treated — Estimated Y(0)

### Washington

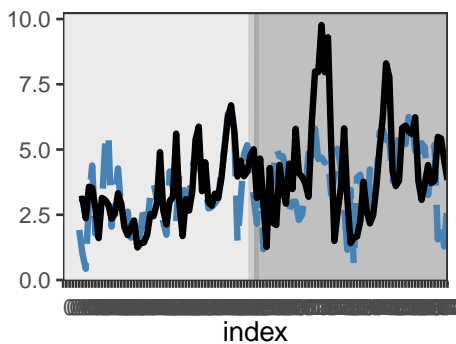

— Treated — Estimated Y(0)

### Minnesota

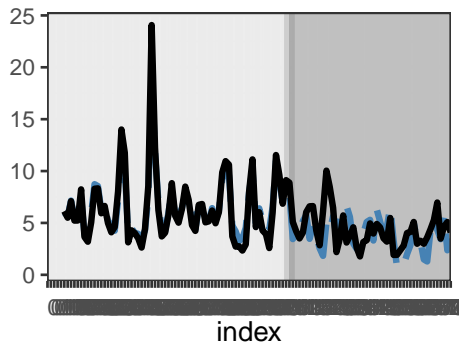

— Treated — Estimated Y(0)

### Massachusetts

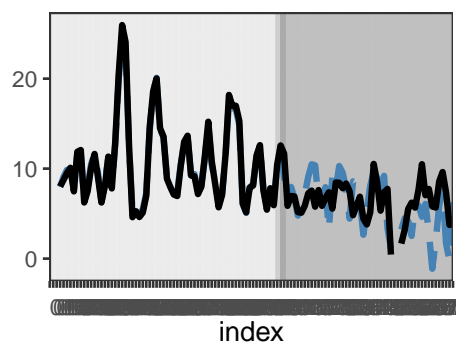

— Treated — Estimated Y(0)

### Washington

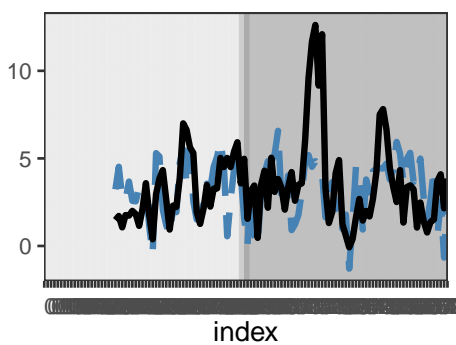

— Treated — Estimated Y(0)

### South Dakota

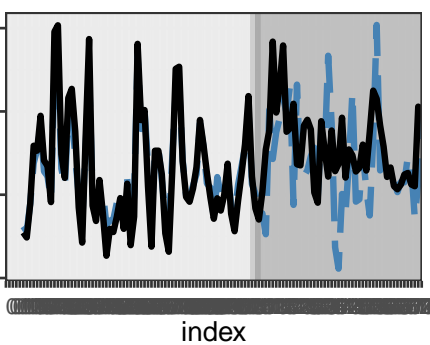

— Treated — Estimated Y(0)

### North Carolina

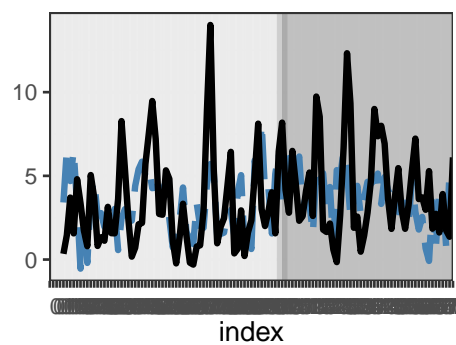

— Treated — Estimated Y(0)

### California

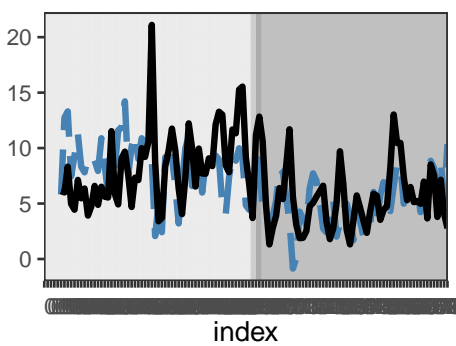

— Treated — Estimated Y(0)

### Vermont

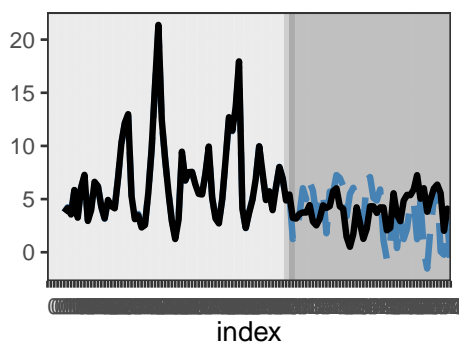

— Treated — Estimated Y(0)

### Arizona

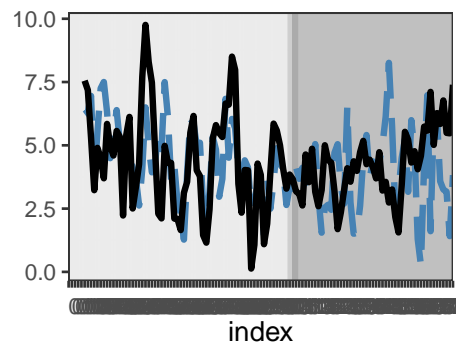

— Treated — Estimated Y(0)

### Missouri

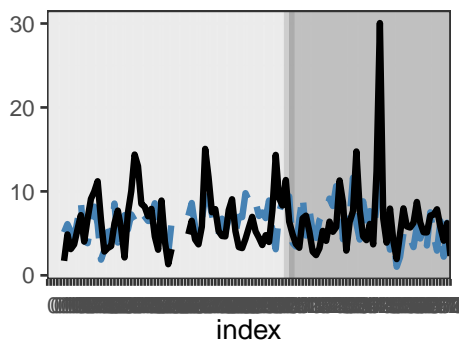

— Treated — Estimated Y(0)

### Minnesota

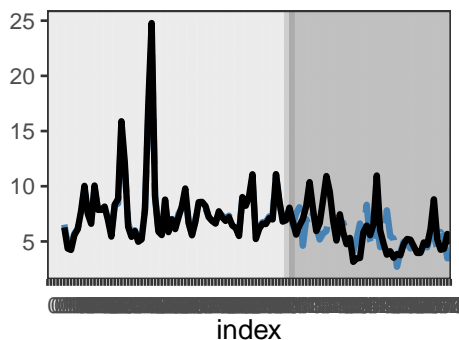

— Treated — Estimated Y(0)

### Oklahoma

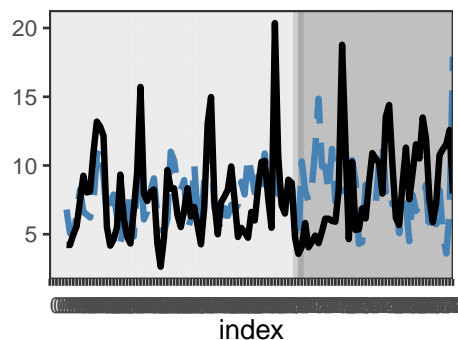

— Treated — Estimated Y(0)

### Alabama

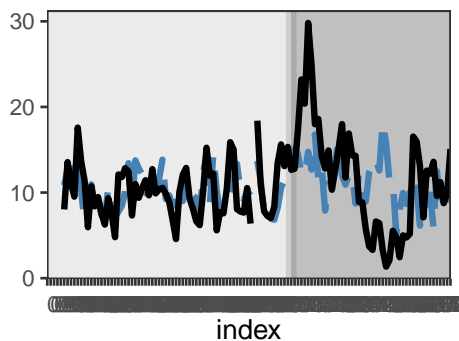

— Treated — Estimated Y(0)

### Oklahoma

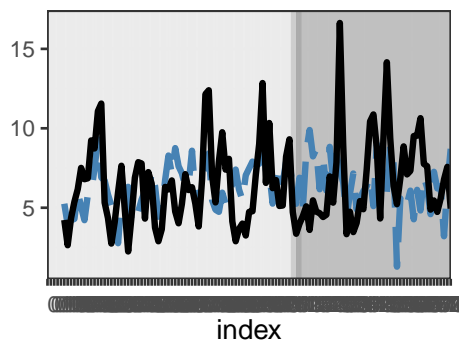

— Treated — Estimated Y(0)

### Tennessee

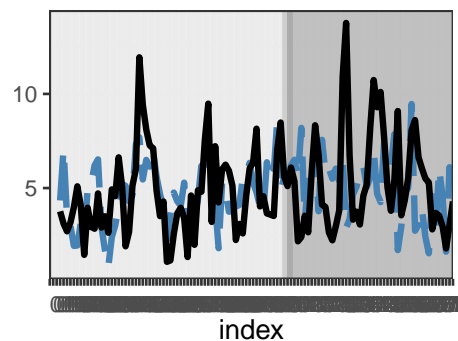

— Treated — Estimated Y(0)

### California

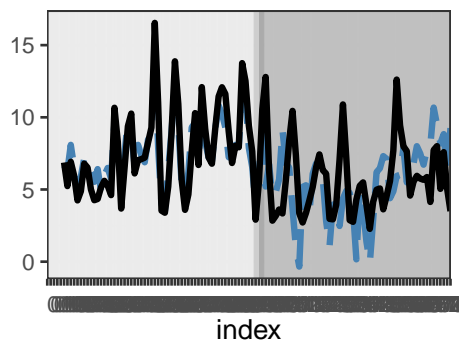

— Treated — Estimated Y(0)

### Arizona

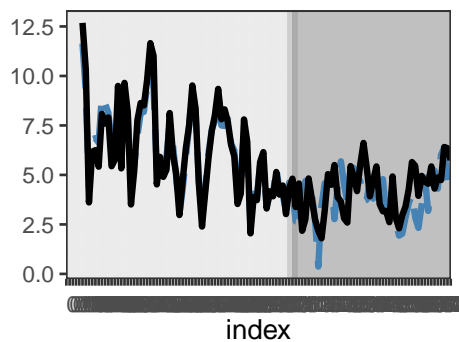

— Treated — Estimated Y(0)

### California

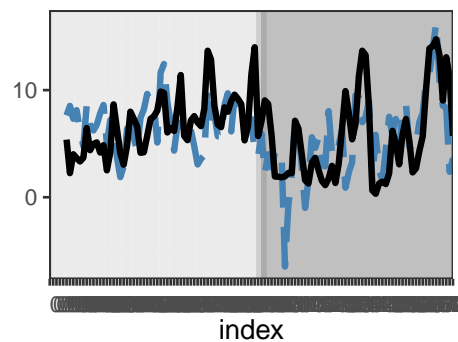

— Treated — Estimated Y(0)

### South Carolina

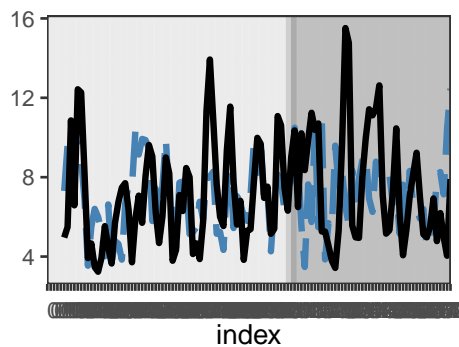

— Treated — Estimated Y(0)

### California

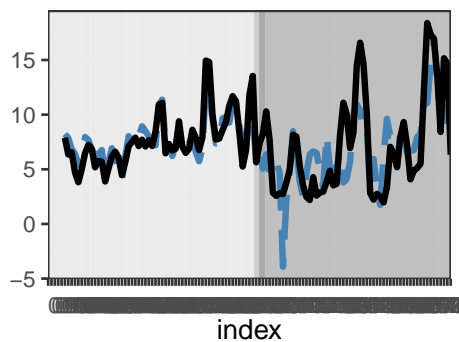

— Treated — Estimated Y(0)

### Montana

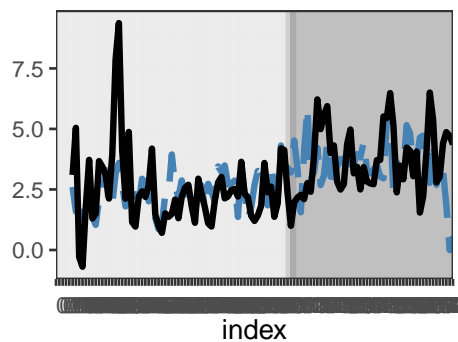

— Treated — Estimated Y(0)

### Kentucky

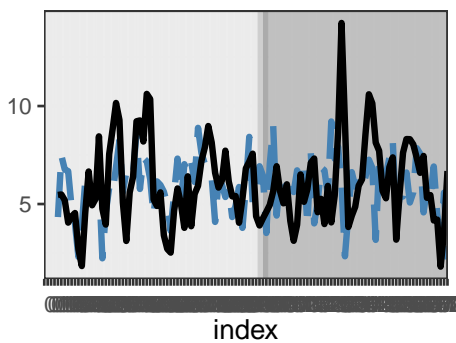

— Treated — Estimated Y(0)

### Illinois

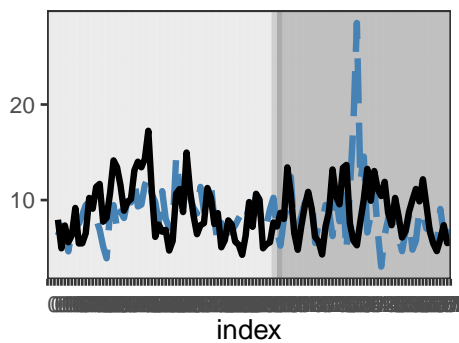

— Treated — Estimated Y(0)

### Minnesota

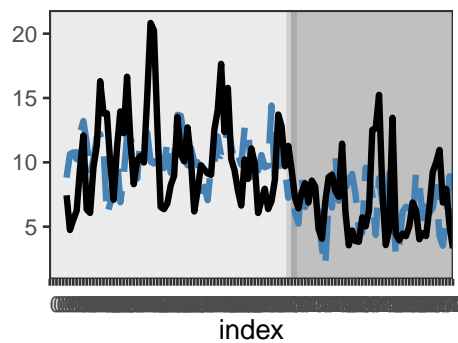

— Treated — Estimated Y(0)

### Pennsylvania

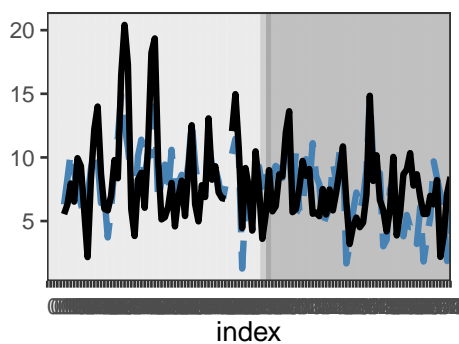

— Treated — Estimated Y(0)

### North Dakota

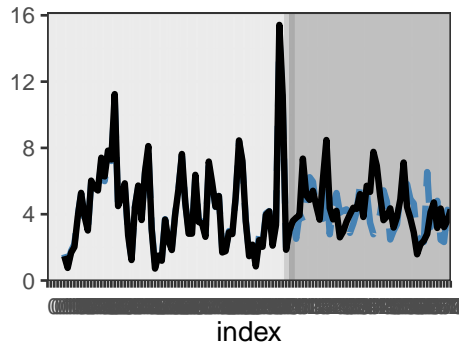

— Treated — Estimated Y(0)

### New York

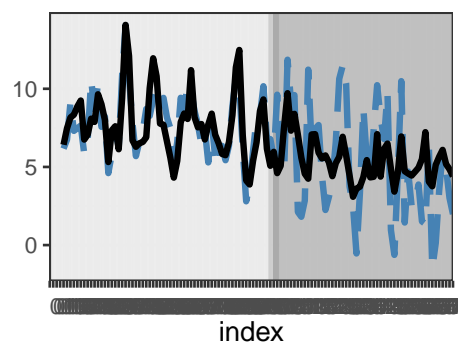

— Treated — Estimated Y(0)

### Oklahoma

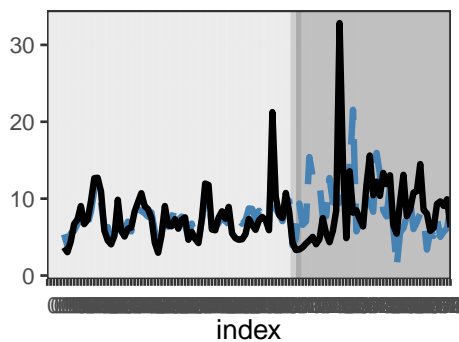

— Treated — Estimated Y(0)

### South Dakota

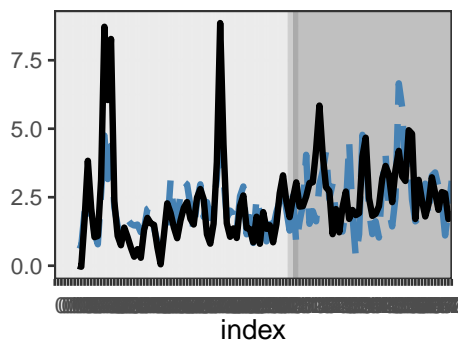

— Treated — Estimated Y(0)

### Pennsylvania

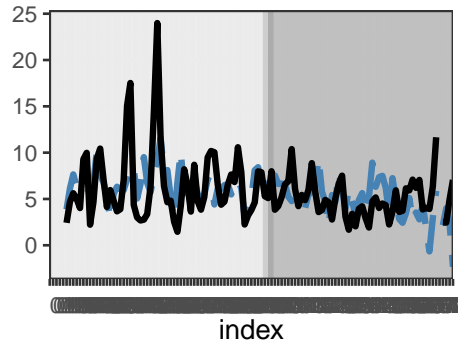

— Treated — Estimated Y(0)

### Oklahoma

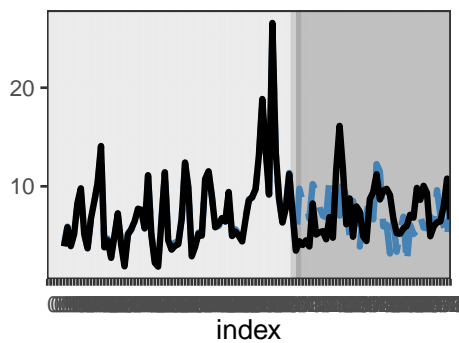

— Treated — Estimated Y(0)

### California

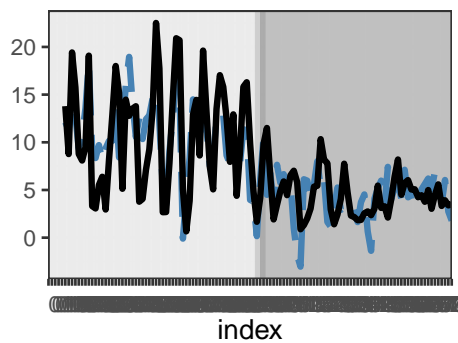

— Treated — Estimated Y(0)

### California

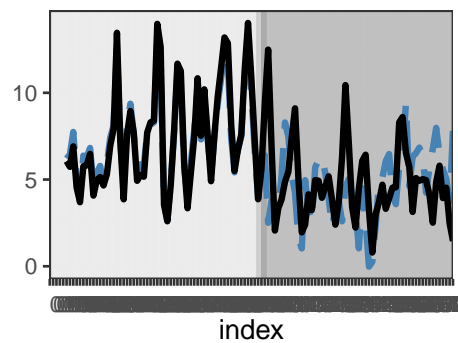

— Treated — Estimated Y(0)

### Colorado

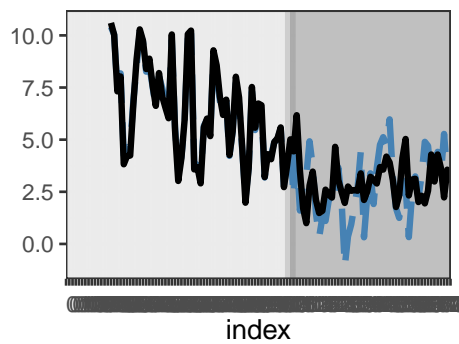

— Treated — Estimated Y(0)

### Wyoming

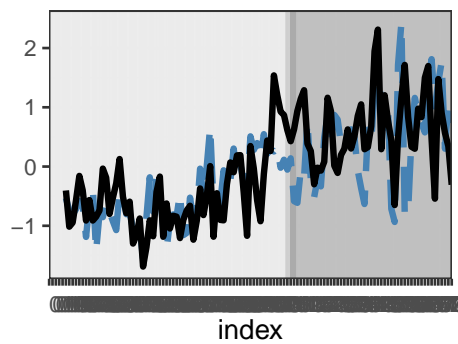

— Treated — Estimated Y(0)

### Missouri

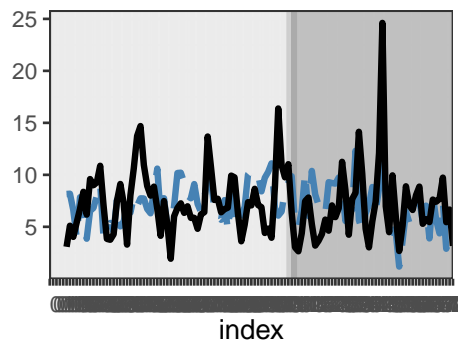

— Treated — Estimated Y(0)

### California

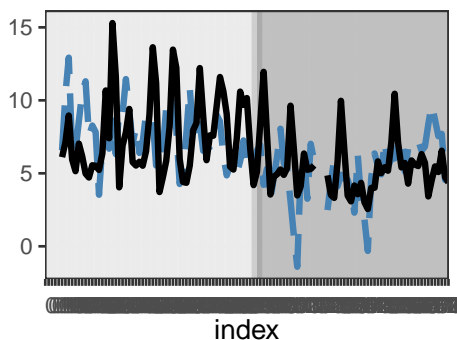

— Treated — Estimated Y(0)

### Virginia

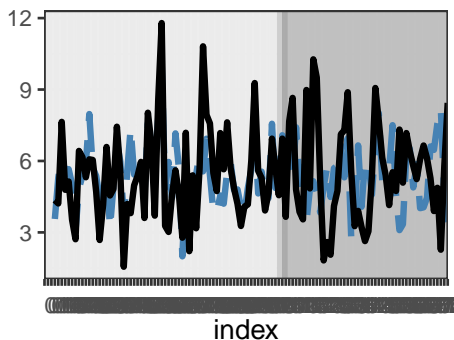

— Treated — Estimated Y(0)

### New York

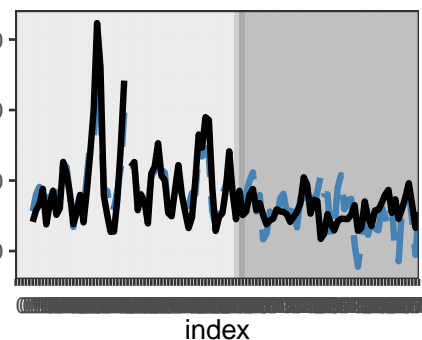

— Treated — Estimated Y(0)

### Washington

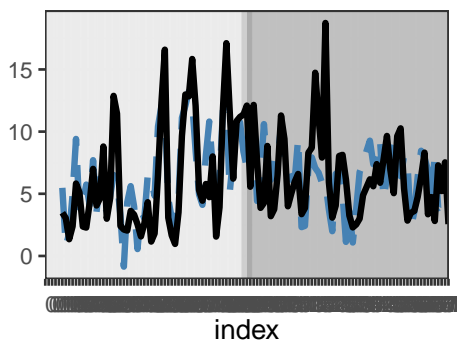

— Treated — Estimated Y(0)

### Kansas

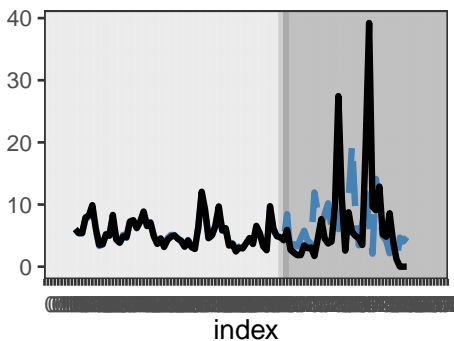

— Treated — Estimated Y(0)

### New York

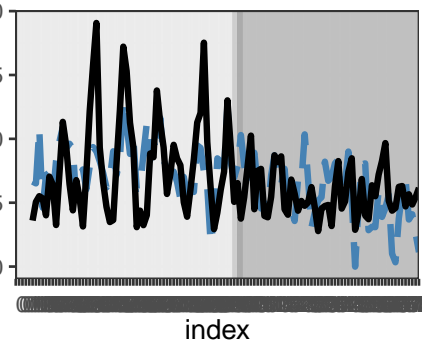

— Treated — Estimated Y(0)

### North Carolina

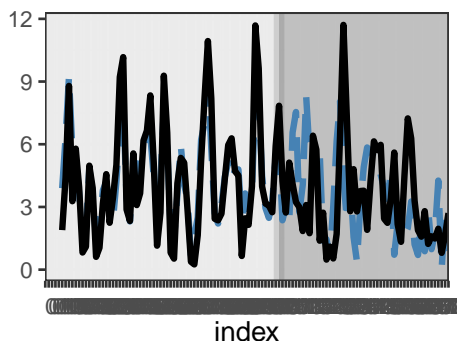

— Treated — Estimated Y(0)

### Georgia

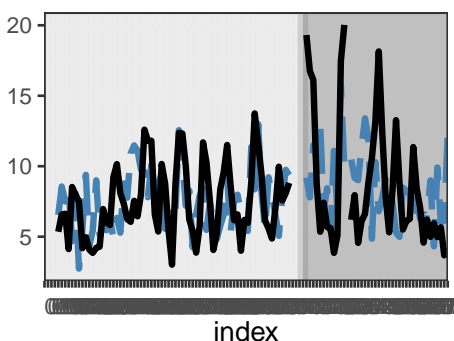

— Treated — Estimated Y(0)

### North Carolina

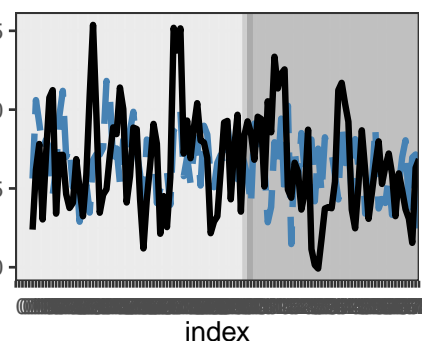

— Treated — Estimated Y(0)



### North Dakota

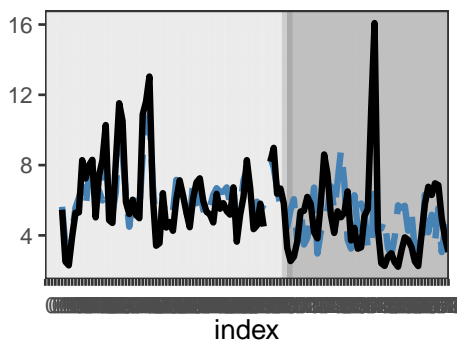

— Treated — Estimated Y(0)

### Missouri

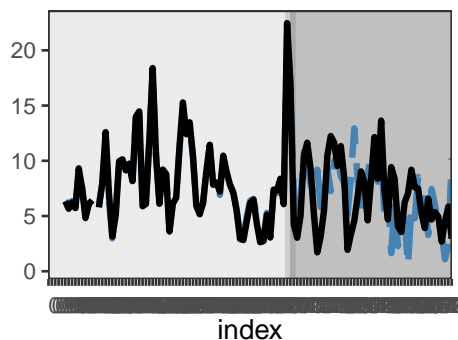

— Treated — Estimated Y(0)

### Missouri

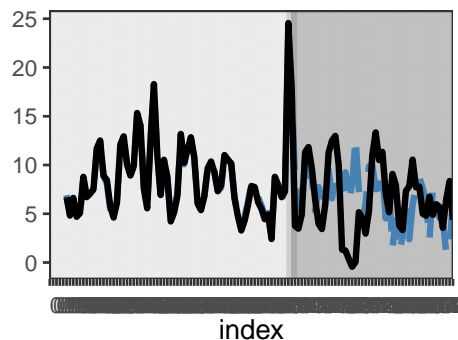

— Treated — Estimated Y(0)

### Florida

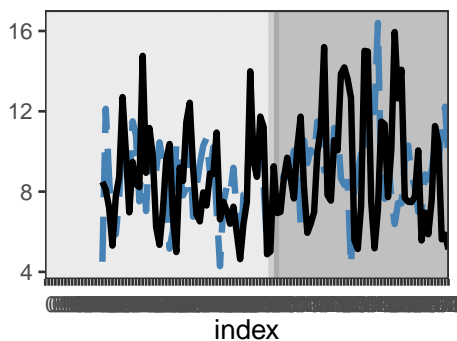

— Treated — Estimated Y(0)

### North Carolina

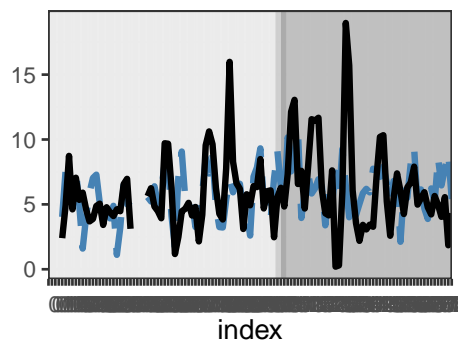

— Treated — Estimated Y(0)

### Pennsylvania

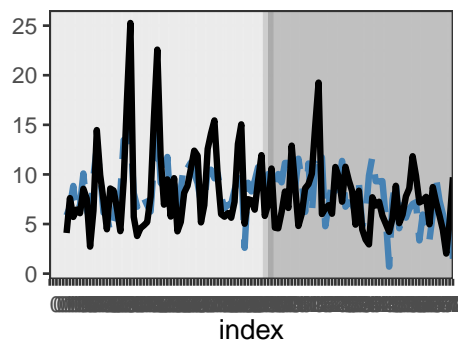

— Treated — Estimated Y(0)

### Wyoming

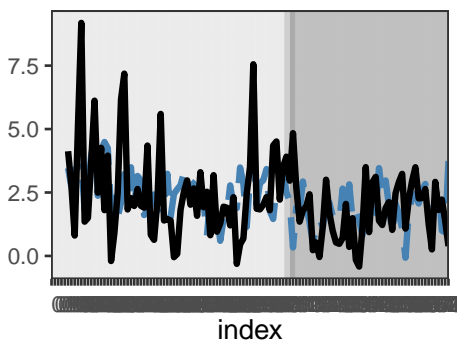

— Treated — Estimated Y(0)

### Minnesota

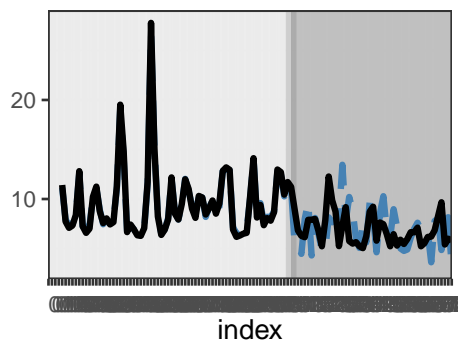

— Treated — Estimated Y(0)

### California

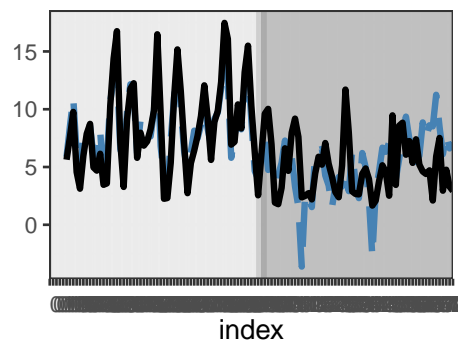

— Treated — Estimated Y(0)

### Maine

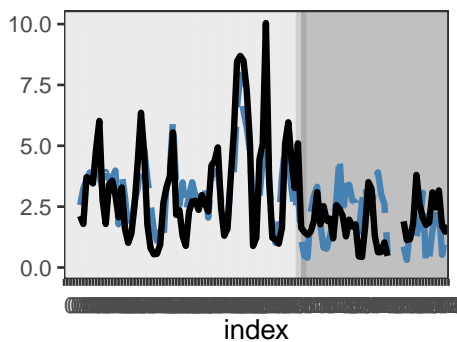

— Treated — Estimated Y(0)

### Florida

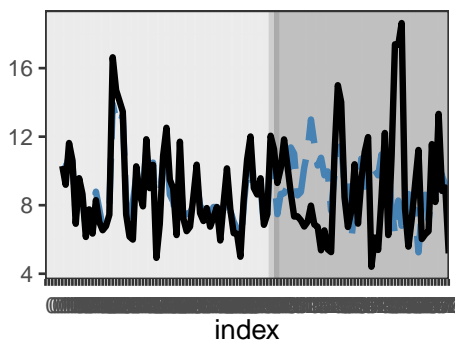

— Treated — Estimated Y(0)

### Minnesota

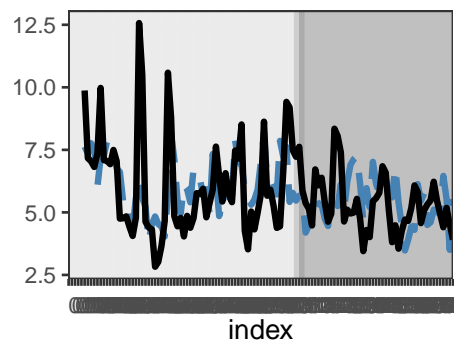

— Treated — Estimated Y(0)

### Tennessee

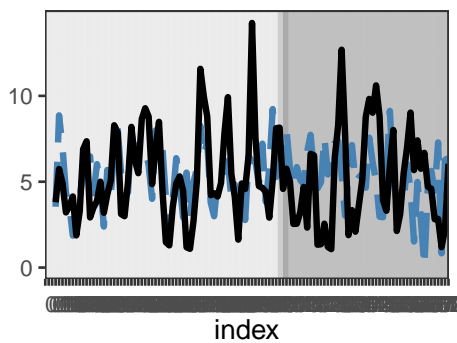

— Treated — Estimated Y(0)

### Washington

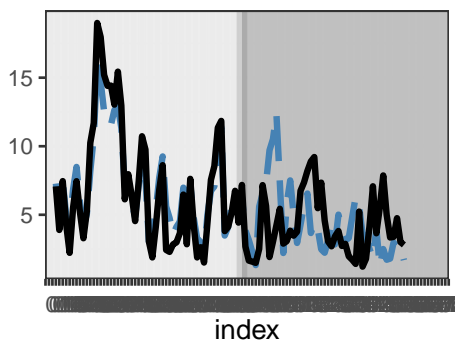

— Treated — Estimated Y(0)

### California

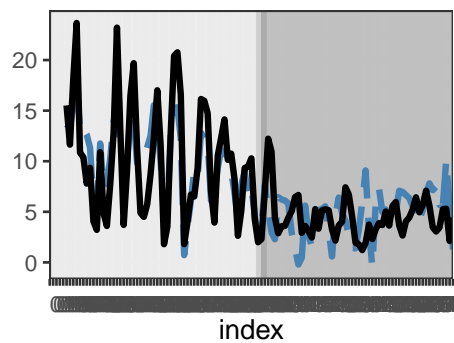

— Treated — Estimated Y(0)

### Indiana

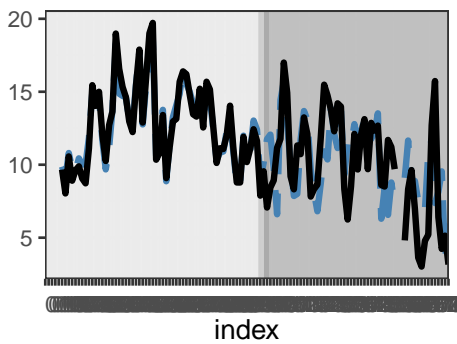

— Treated — Estimated Y(0)

### California

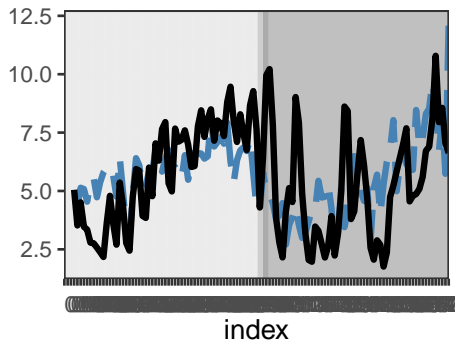

— Treated — Estimated Y(0)

### Arizona

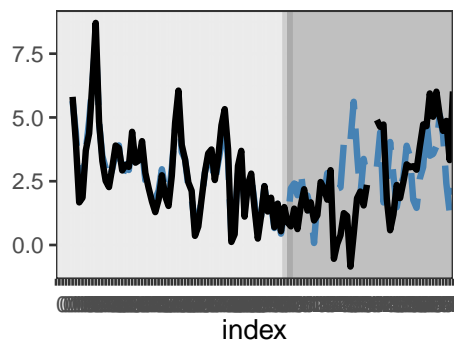

— Treated — Estimated Y(0)

### Arizona

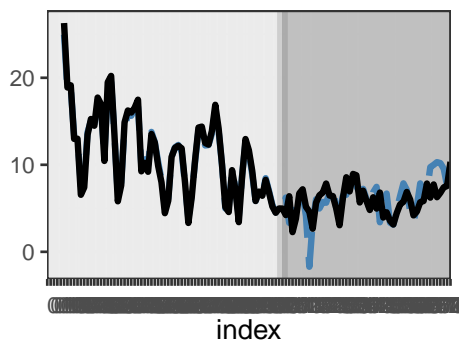

— Treated — Estimated Y(0)

### Mississippi

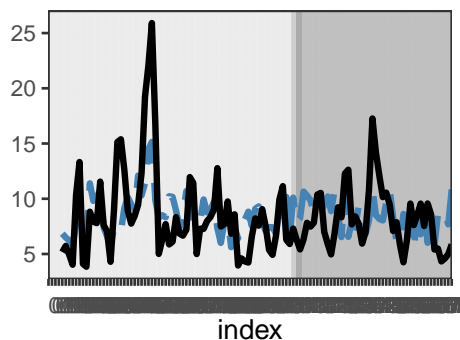

— Treated — Estimated Y(0)

### Vermont

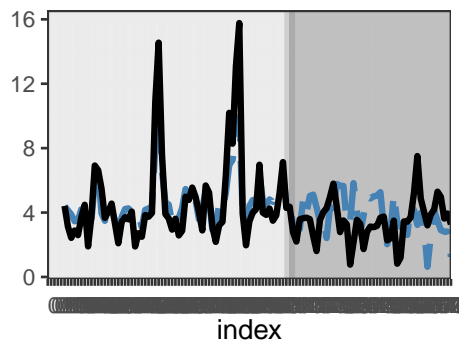

— Treated — Estimated Y(0)

### South Dakota

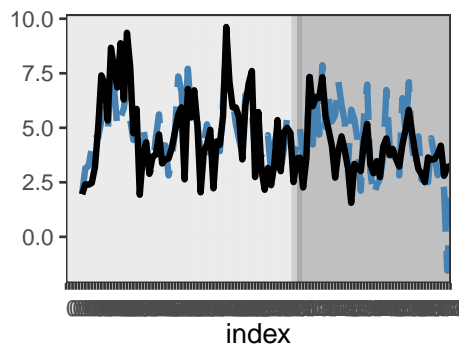

— Treated — Estimated Y(0)

### Tennessee

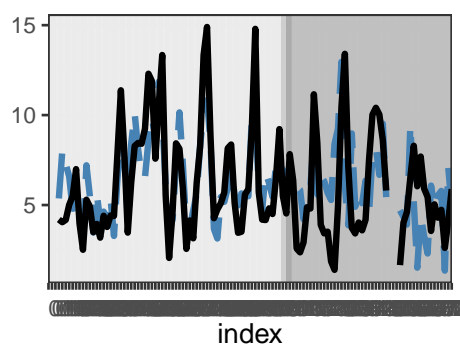

— Treated — Estimated Y(0)

### Oklahoma

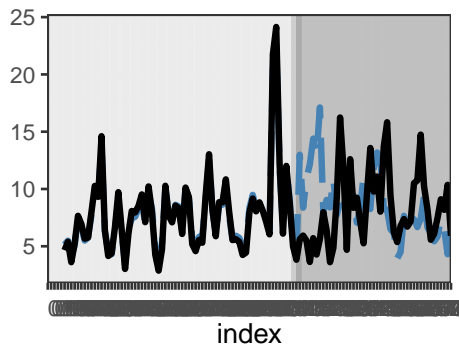

— Treated — Estimated Y(0)

### California

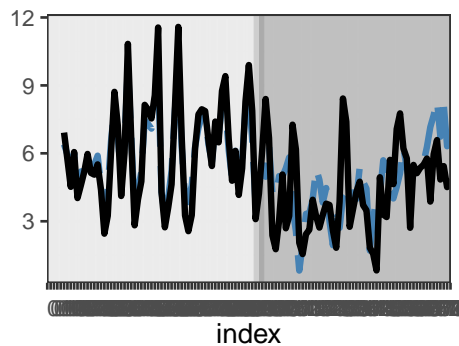

— Treated — Estimated Y(0)

### Florida

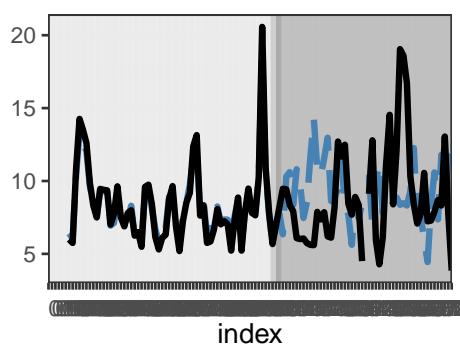

— Treated — Estimated Y(0)

### California

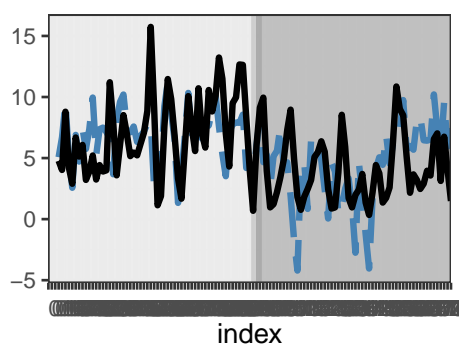

— Treated — Estimated Y(0)

### California

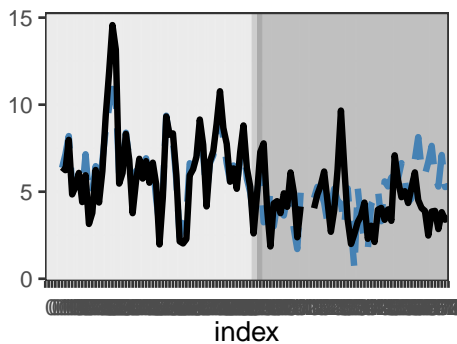

— Treated — Estimated Y(0)

### South Carolina

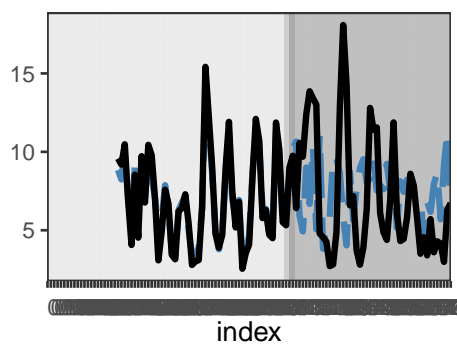

— Treated — Estimated Y(0)

### North Dakota

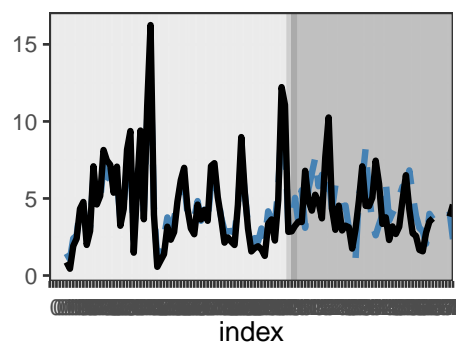

— Treated — Estimated Y(0)

### Colorado

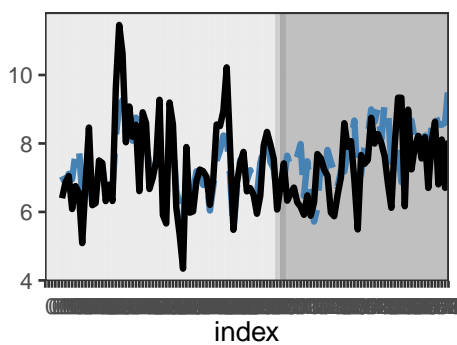

— Treated — Estimated Y(0)

### Florida

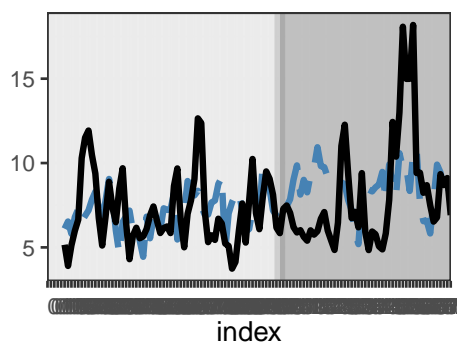

— Treated — Estimated Y(0)

### Kentucky

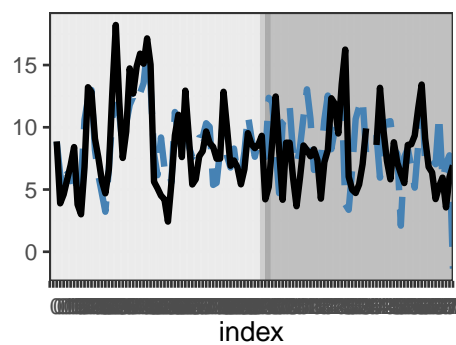

— Treated — Estimated Y(0)

### California

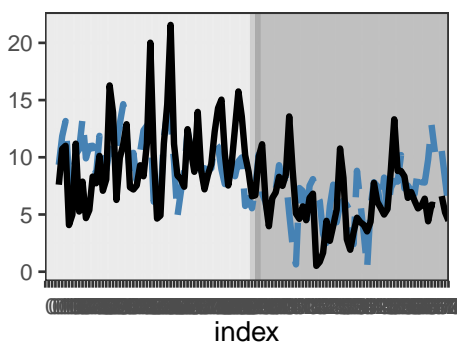

— Treated — Estimated Y(0)

### New Mexico

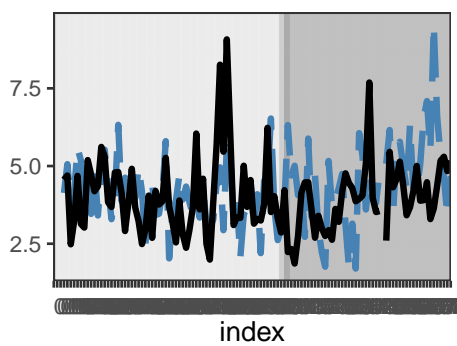

— Treated — Estimated Y(0)

### California

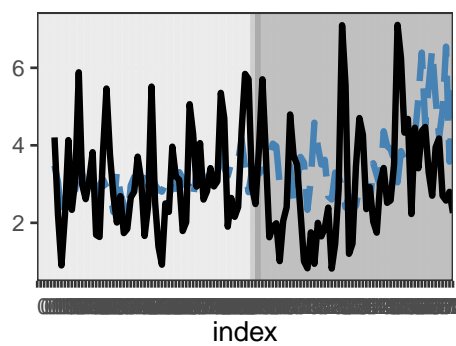

— Treated — Estimated Y(0)

### Maine

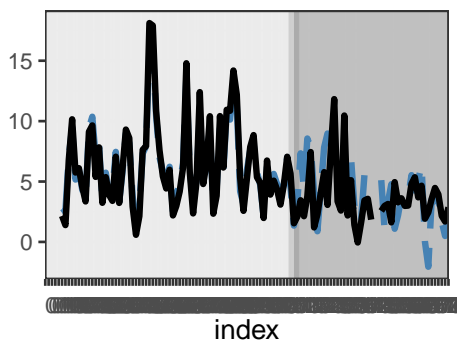

— Treated — Estimated Y(0)

### Georgia

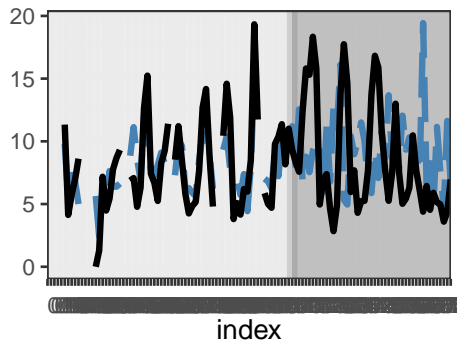

— Treated — Estimated Y(0)

### California

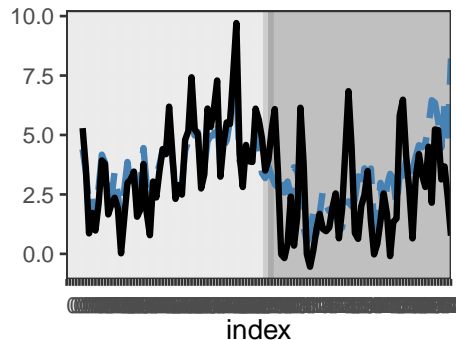

— Treated — Estimated Y(0)

### New Mexico

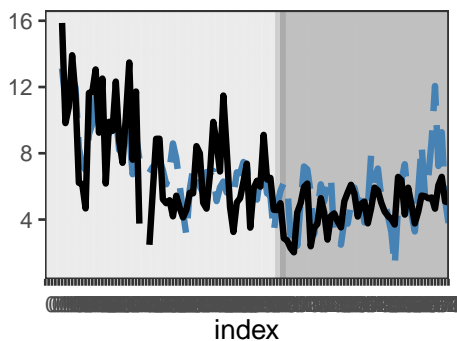

— Treated — Estimated Y(0)

### California

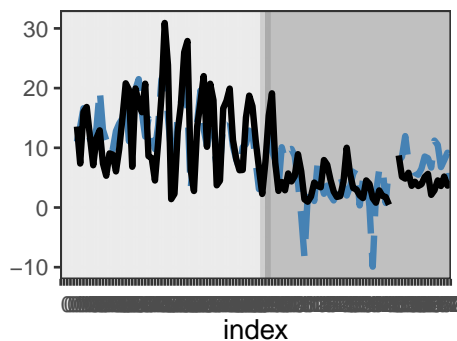

— Treated — Estimated Y(0)

### Maine

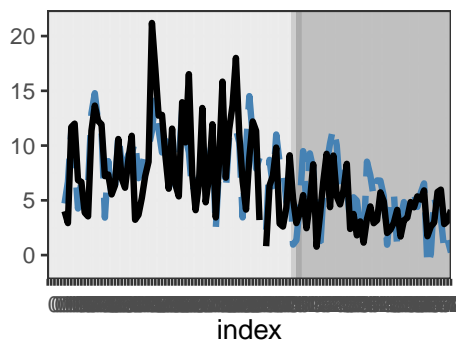

— Treated — Estimated Y(0)

### Vermont

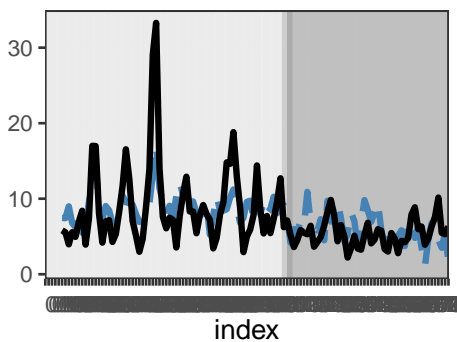

— Treated — Estimated Y(0)

### California

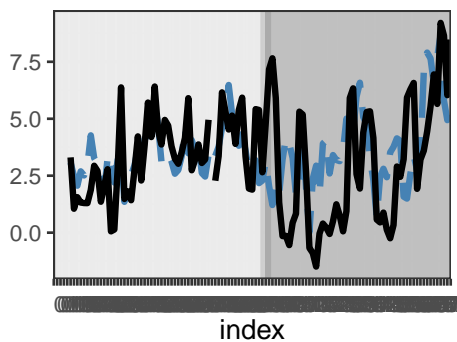

— Treated — Estimated Y(0)

### California

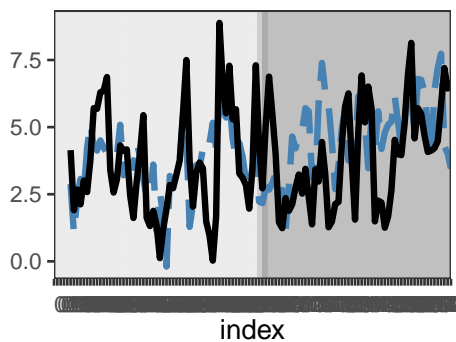

— Treated — Estimated Y(0)

### Florida

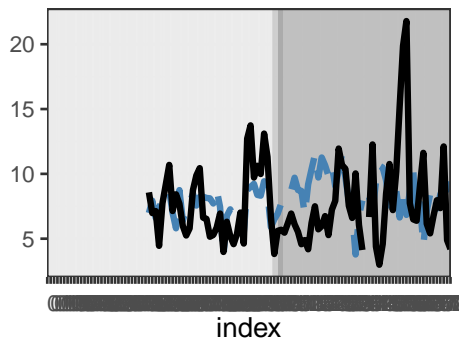

— Treated — Estimated Y(0)

### North Carolina

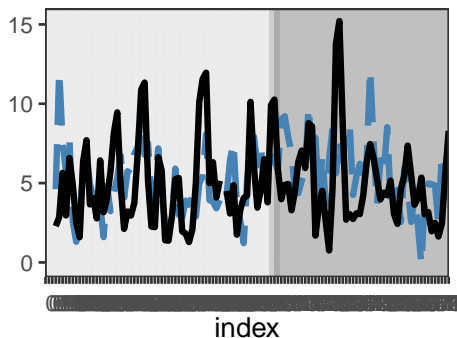

— Treated — Estimated Y(0)

### Idaho

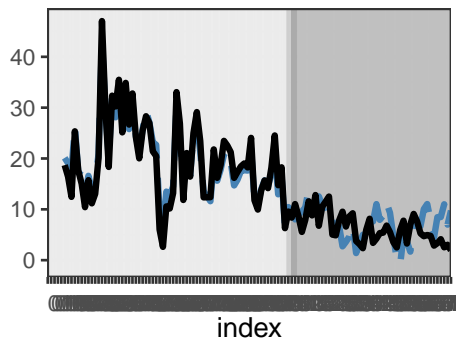

— Treated — Estimated Y(0)

### California

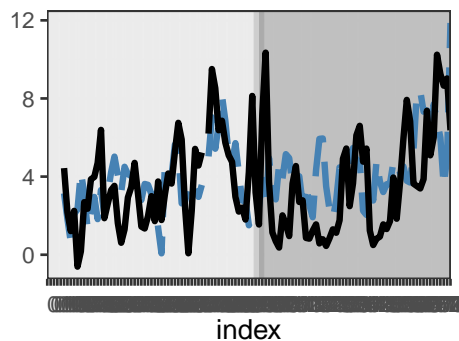

— Treated — Estimated Y(0)

### California

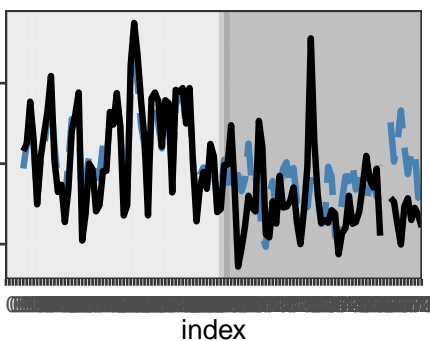

— Treated — Estimated Y(0)

### California

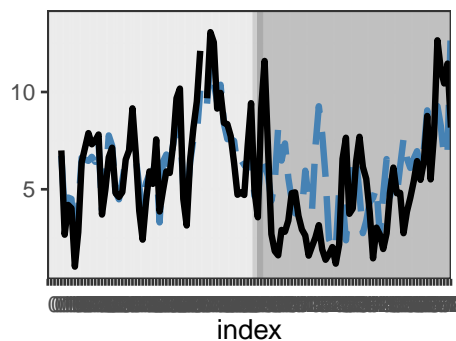

— Treated — Estimated Y(0)

### California

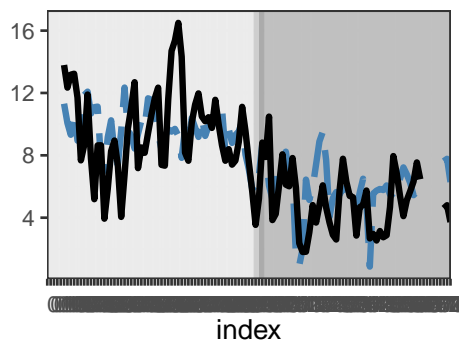

— Treated — Estimated Y(0)

### California

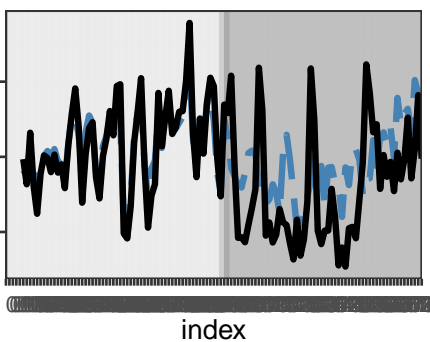

— Treated — Estimated Y(0)

### North Carolina

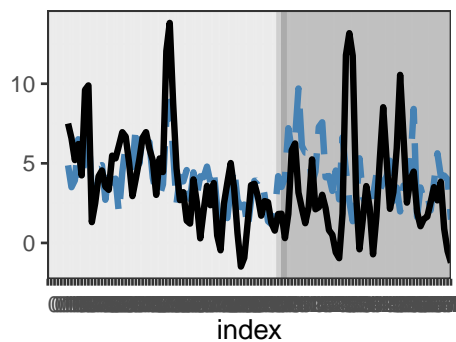

— Treated — Estimated Y(0)

### Florida

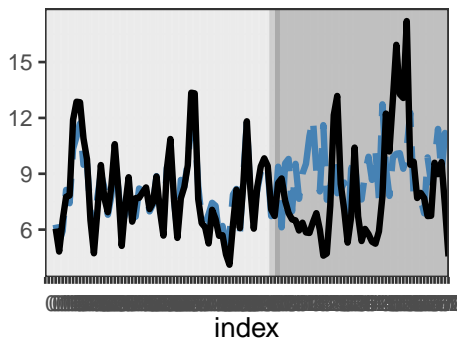

— Treated — Estimated Y(0)

### Arizona

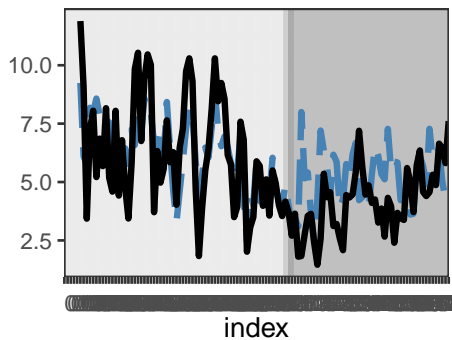

— Treated — Estimated Y(0)

### California

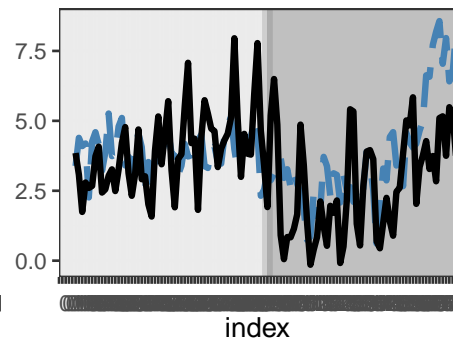

— Treated — Estimated Y(0)

### Florida

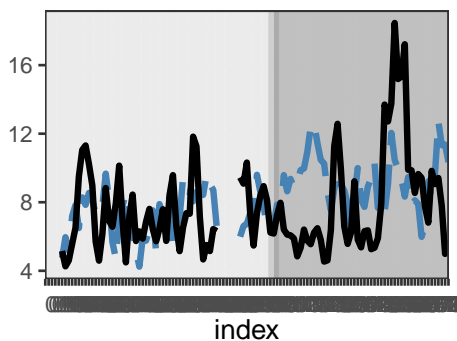

— Treated — Estimated Y(0)

### California

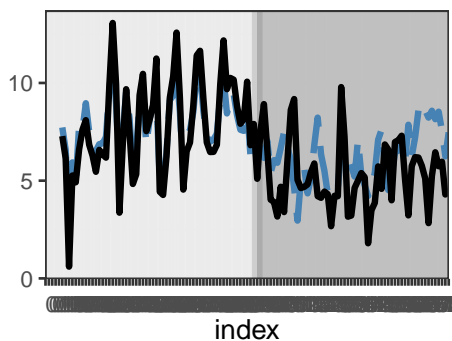

— Treated — Estimated Y(0)

### New Mexico

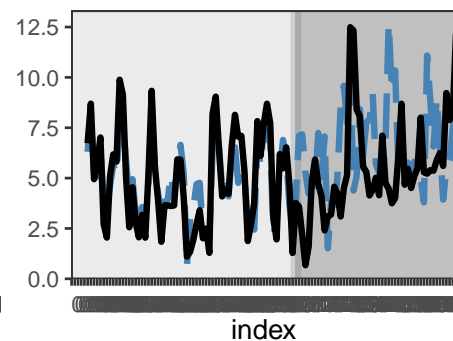

— Treated — Estimated Y(0)

### Pennsylvania

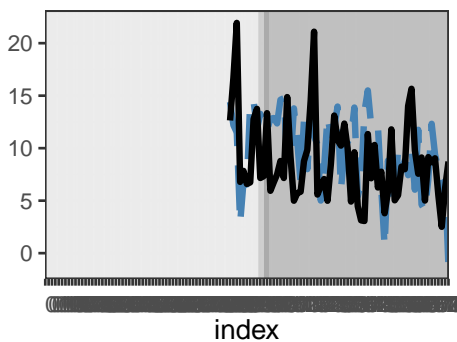

— Treated — Estimated Y(0)

### California

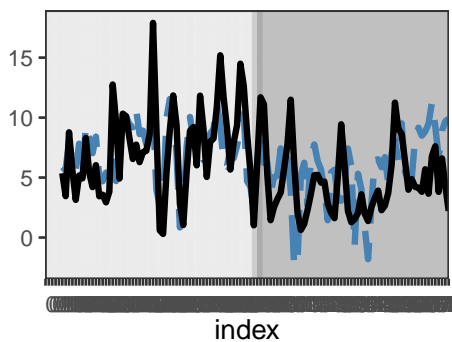

— Treated — Estimated Y(0)

### New Jersey

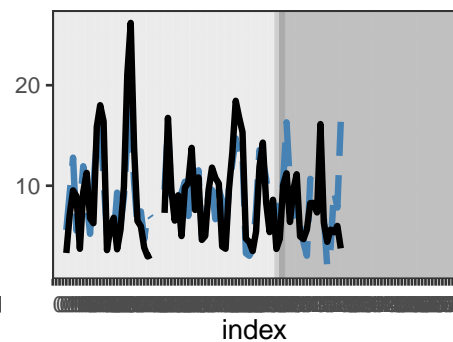

— Treated — Estimated Y(0)

### California

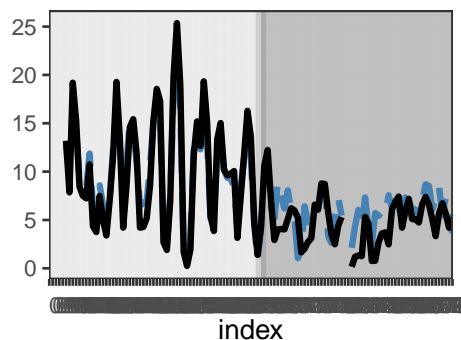

— Treated — Estimated Y(0)

### California

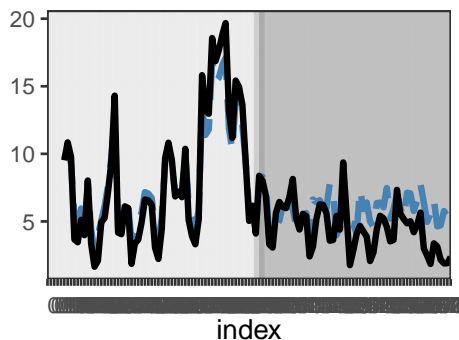

— Treated — Estimated Y(0)

### California

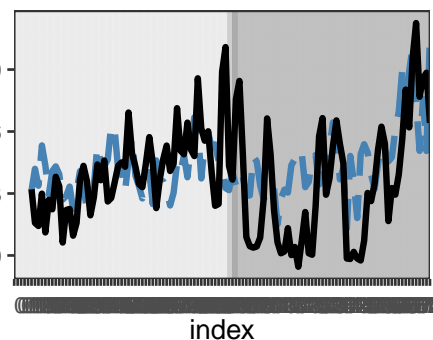

— Treated — Estimated Y(0)

### New Mexico

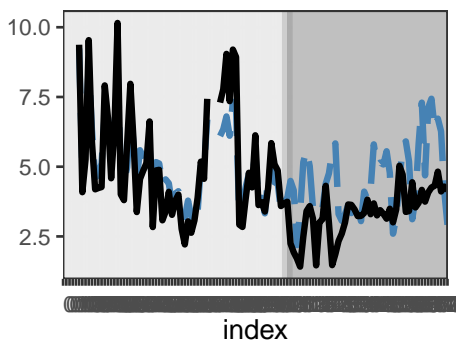

— Treated — Estimated Y(0)

### Nevada

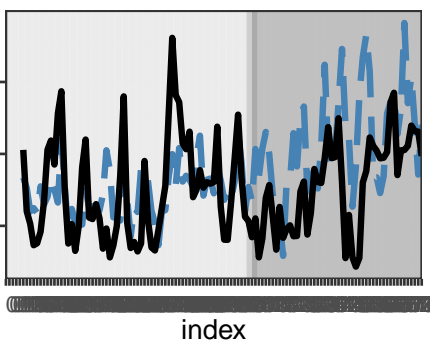

— Treated — Estimated Y(0)

### Arizona

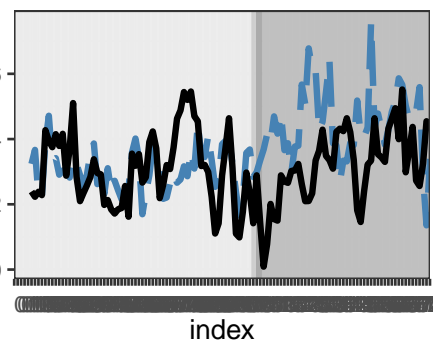

— Treated — Estimated Y(0)

### Arizona

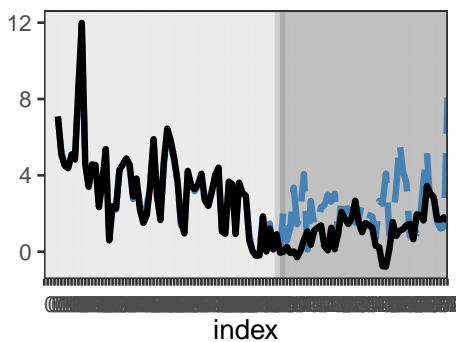

— Treated — Estimated Y(0)

### California

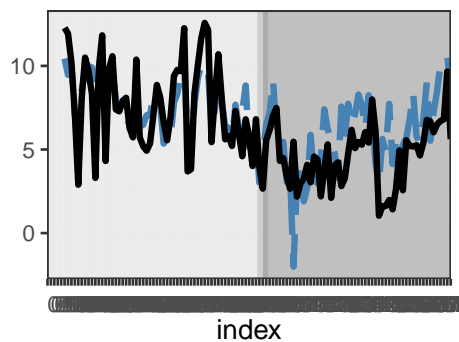

— Treated — Estimated Y(0)

### New York

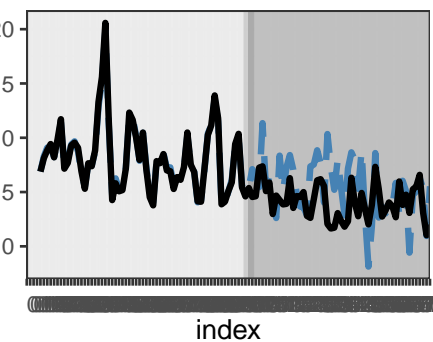

— Treated — Estimated Y(0)



### Arizona

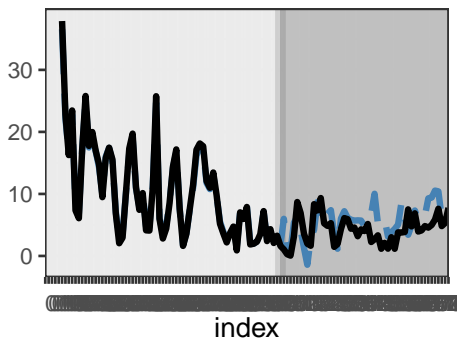

— Treated — Estimated Y(0)

### Utah

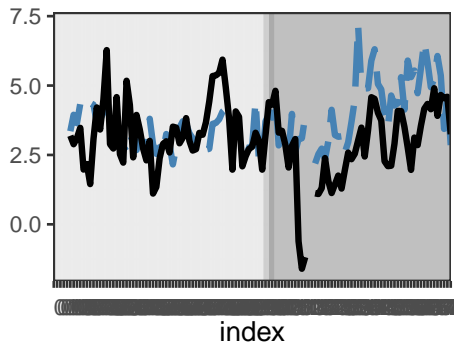

— Treated — Estimated Y(0)

### Arizona

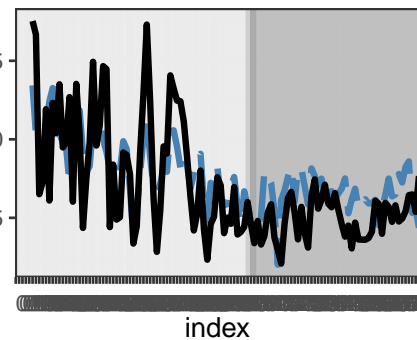

— Treated — Estimated Y(0)

### Arizona

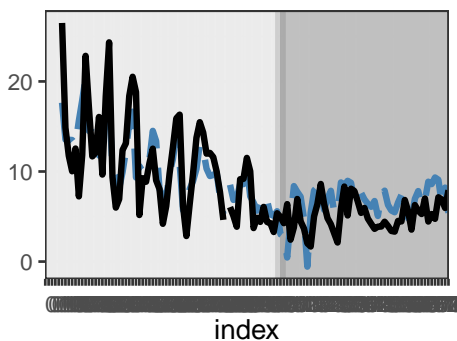

— Treated — Estimated Y(0)

### Arizona

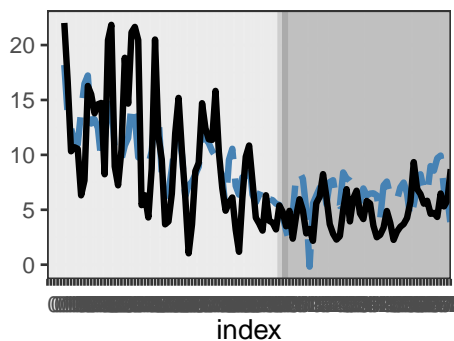

— Treated — Estimated Y(0)

### Utah

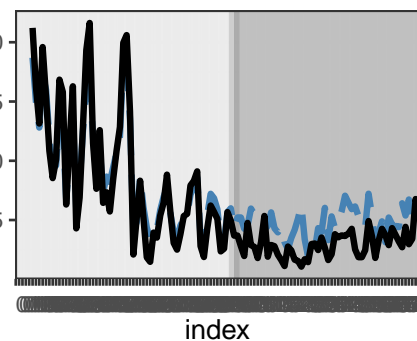

— Treated — Estimated Y(0)

### California

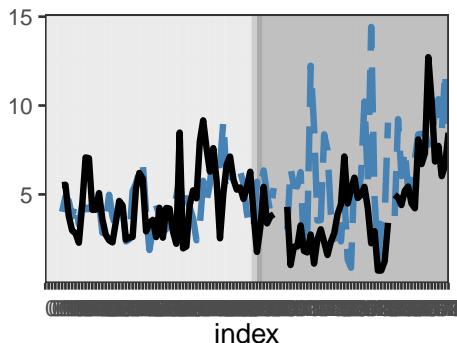

— Treated — Estimated Y(0)

### Arizona

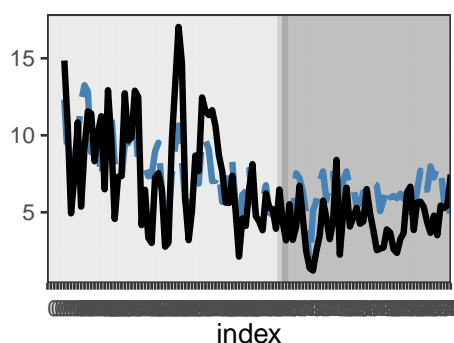

— Treated — Estimated Y(0)

### Montana

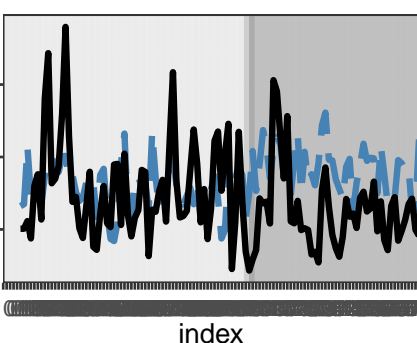

— Treated — Estimated Y(0)

### Arizona

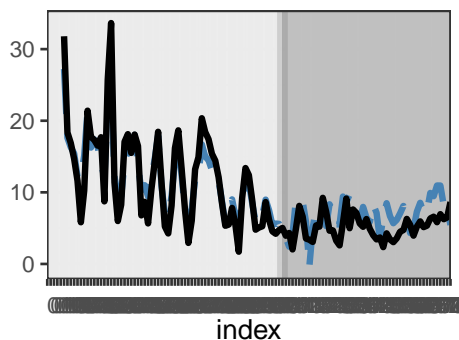

— Treated — Estimated Y(0)

### Nevada

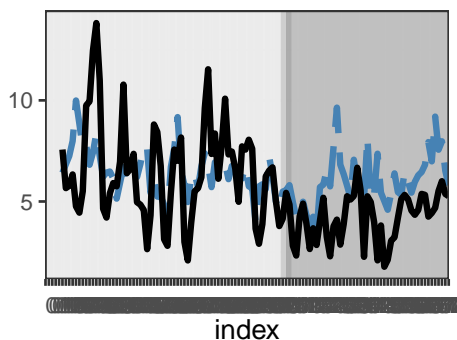

— Treated — Estimated Y(0)

### Arizona

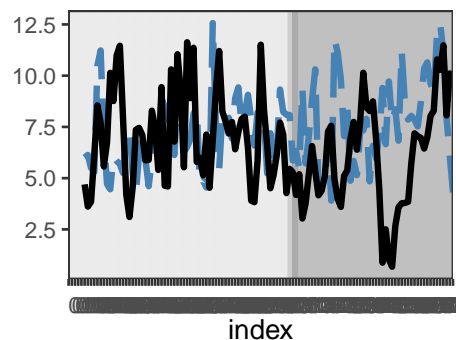

— Treated — Estimated Y(0)

### Ohio

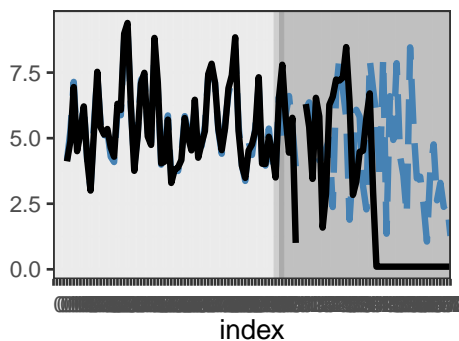

— Treated — Estimated Y(0)

### South Carolina

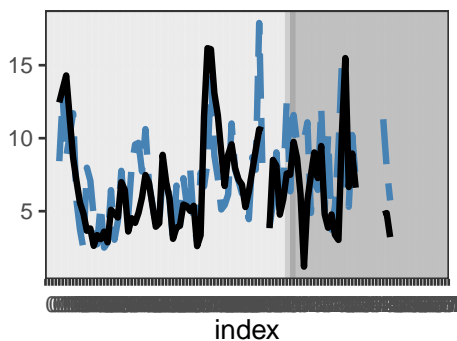

— Treated — Estimated Y(0)

### New Mexico

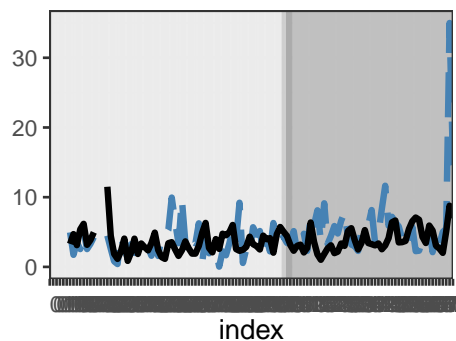

— Treated — Estimated Y(0)

### California

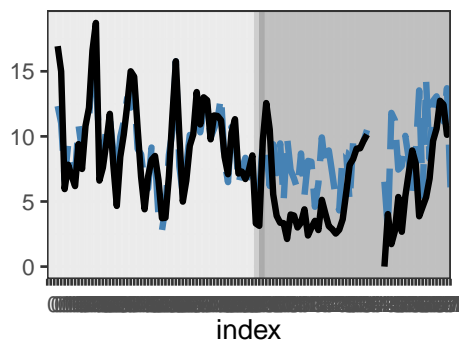

— Treated — Estimated Y(0)

### California

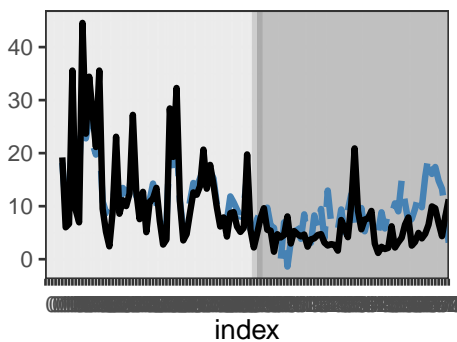

— Treated — Estimated Y(0)

### California

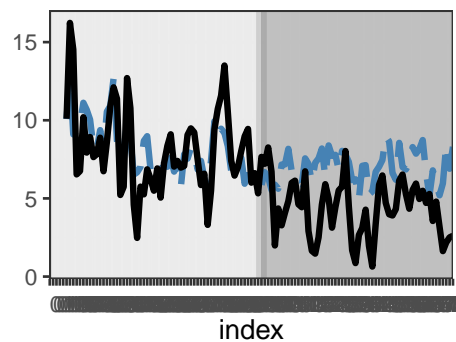

— Treated — Estimated Y(0)

### Nevada

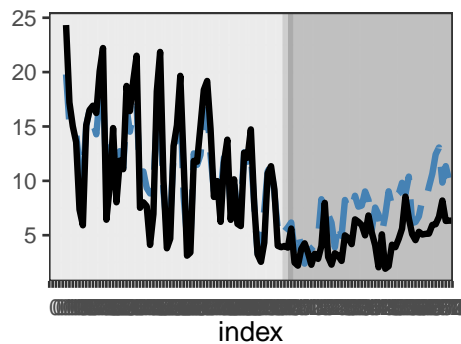

— Treated — Estimated Y(0)

### California

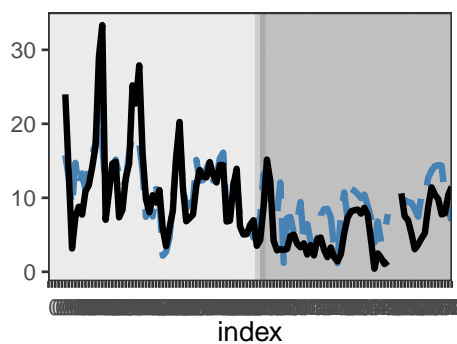

— Treated — Estimated Y(0)

### California

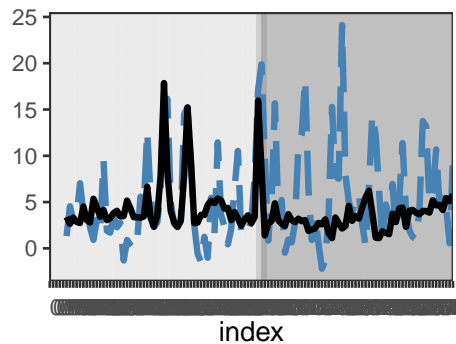

— Treated — Estimated Y(0)

### California

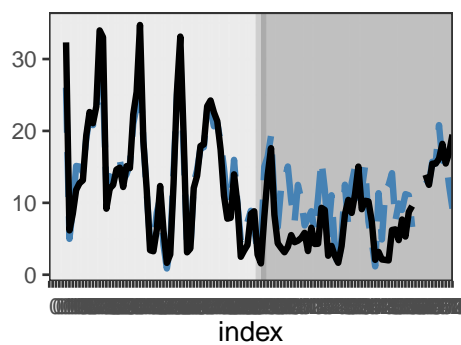

— Treated — Estimated Y(0)

### California

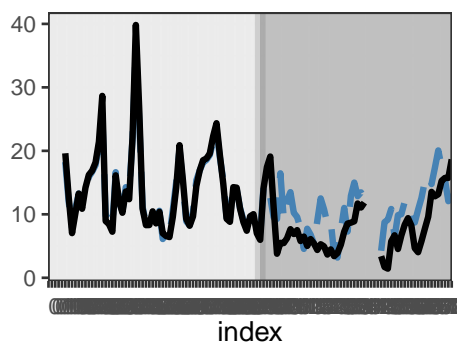

— Treated — Estimated Y(0)

### California

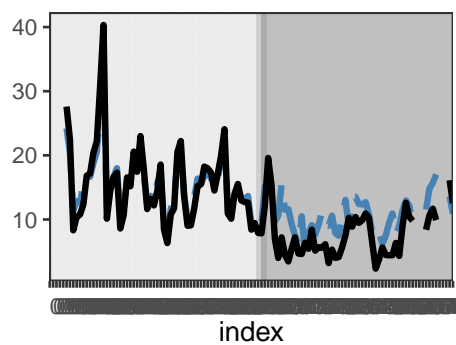

— Treated — Estimated Y(0)

### California

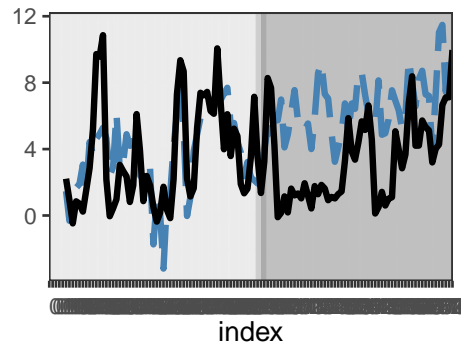

— Treated — Estimated Y(0)

### California

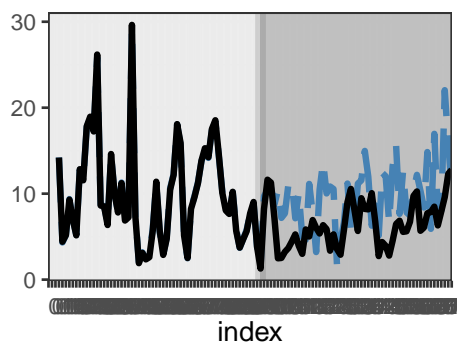

— Treated — Estimated Y(0)

### California

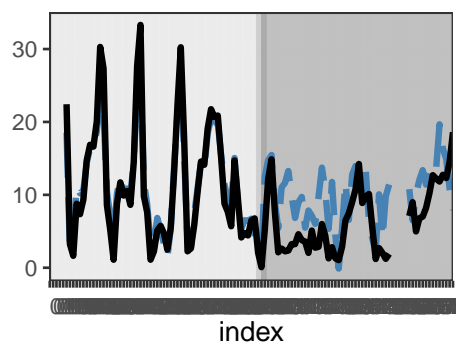

— Treated — Estimated Y(0)

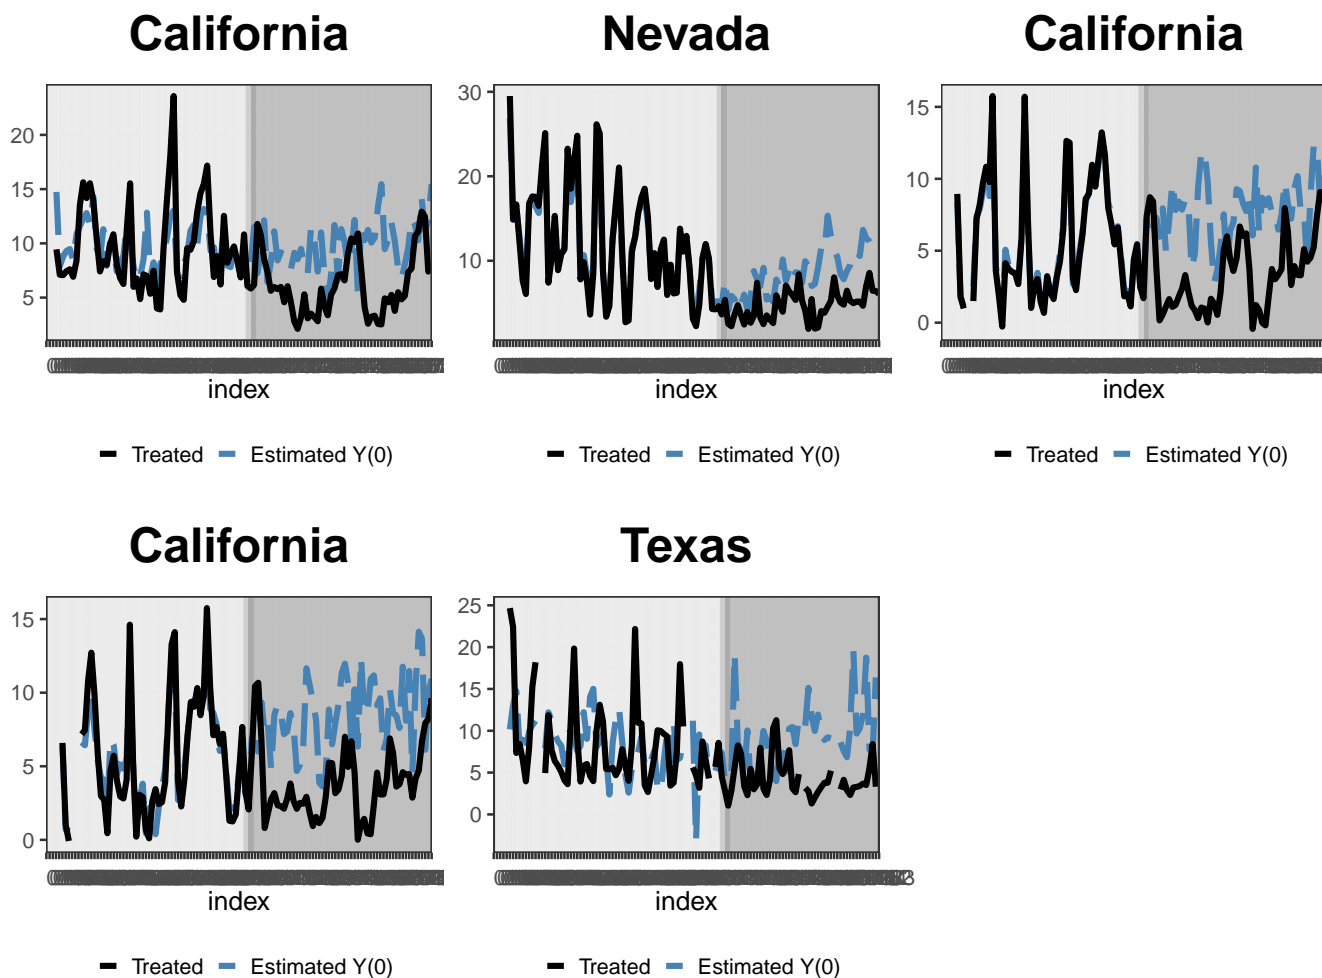

**Figure 1.** Plots of observed and counterfactual PM<sub>2.5</sub> concentrations at each of the 455 monitor sites in 2020. The black lines shown are the observed levels, the blue dotted lines are the counterfactuals, and dark gray areas indicate the lockdown period while light gray areas indicate the pre-lockdown period in 2020.
